# Supplementary material for: [3 + 1 + 1] cyclization of vinyl oxiranes with azides and CO by tandem palladium catalysis: efficient synthesis of oxazolidinones
Source: Royal Society of Chemistry journal article supplement (doi:10.1039/d1qo00591j), 2021-01-01

## *Supporting Information*

### **[3+1+1] Cyclization of Vinyl Oxiranes with Azides and CO by Tandem Palladium Catalysis: Efficient Synthesis of Oxazolidinones**

Zheng-Yang Gu,<sup>1,2</sup> and Ji-Bao Xia <sup>\*,2</sup>

<sup>1</sup>College of Textiles and Clothing & Key Laboratory for Advanced Technology in Environmental Protection of Jiangsu Province, Yancheng Institute of Technology, Yancheng, 224051, China

<sup>2</sup>State Key Laboratory for Oxo Synthesis and Selective Oxidation, Center for Excellence in Molecular Synthesis, Suzhou Research Institute of LICP, Lanzhou Institute of Chemical Physics (LICP), University of Chinese Academy of Sciences, Chinese Academy of Sciences, Lanzhou 730000, China

Corresponding Author: jibaomia@licp.cas.cn

#### **Table of Contents**

|      |                                                                                                            |     |
|------|------------------------------------------------------------------------------------------------------------|-----|
| I.   | General Information-----                                                                                   | S1  |
| II.  | Mechanistic Studies-----                                                                                   | S2  |
| III. | General Procedure for the Synthesis of Starting Materials-----                                             | S2  |
| IV.  | General Procedure for the Synthesis of Oxazolidinones and Characterization<br>Data of Oxazolidinones ----- | S5  |
| V.   | Synthetic Applications-----                                                                                | S16 |
| VI.  | Copy of NMR Spectra -----                                                                                  | S19 |

## I. General Information

All intermolecular amidation reactions were carried out under atmospheric pressure of carbon monoxide (CO) in oven-dried Schlenk tube. Thin layer chromatography (TLC) employed glass 0.25 mm silica gel plates. Flash chromatography columns were packed with 200-300 mesh silica gel in petroleum (bp. 60-90 °C). The High Resolution MS analyses were performed on Thermo Fisher Scientific LTQ FT Ultra with DART Positive Mode or Agilent 6530 Accurate-Mass Q-TOF LC/MS with ESI mode. NMR spectra were recorded on a 400 MHz for  $^1\text{H}$  NMR and 100 MHz for  $^{13}\text{C}$  NMR, using tetramethylsilane as an internal reference DMSO- $d_6$  and  $\text{CDCl}_3$  as solvent. Chemical shift values for protons are reported in parts per million (ppm,  $\delta$  scale) downfield from tetramethylsilane and are referenced to residual proton of DMSO- $d_6$  ( $\delta$  2.50) and residual proton ( $\delta$  7.26) in  $\text{CDCl}_3$ . Multiplicity is indicated by one or more of the following: s (singlet); d (doublet); t (triplet); q (quartet); p (pentet); m (multiplet); br (broad). Carbon nuclear magnetic resonance spectra ( $^{13}\text{C}$  NMR) were recorded at 100 MHz. Chemical shifts for carbons are reported in parts per million (ppm,  $\delta$  scale) downfield from tetramethylsilane and are referenced to the carbon resonance of DMSO- $d_6$  ( $\delta$  40.00) and  $\text{CDCl}_3$  (77.16). Materials were purchased from Tokyo Chemical Industry Co., Aldrich Inc., Alfa Aesar, Adamas, or other commercial suppliers and used as received unless otherwise noted. Sulfonyl azides were purchased if commercially available or prepared from sulfonyl chlorides and sodium azide according to the well-established methods.

## II. Mechanistic Studies

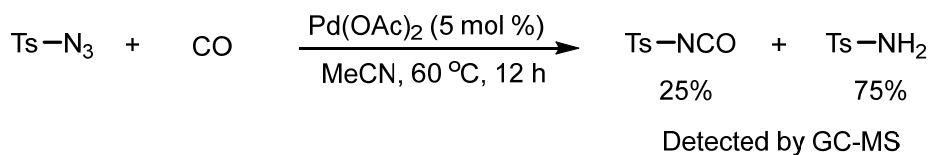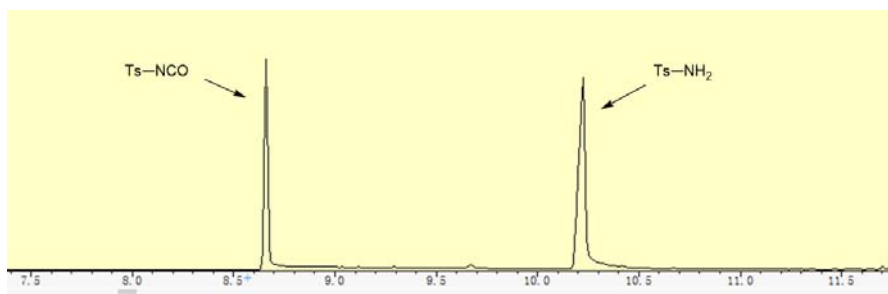

Scheme S1. Control experiments.

## III. General Procedure for the Synthesis of Starting Materials

### General Procedure for the Synthesis of Vinyl Oxiranes **1c** and **1d**.<sup>1</sup>

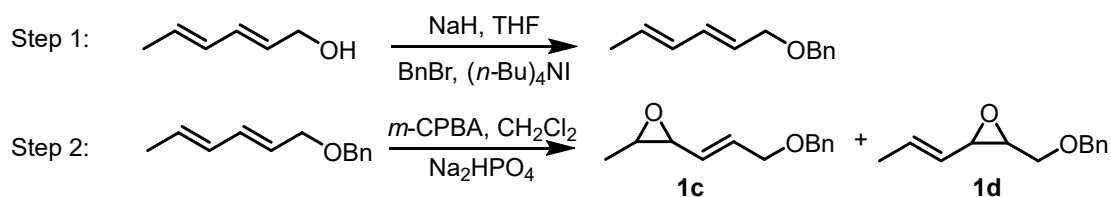

**Step 1:** A 100 mL flask equipped with a stir bar containing THF (20 mL), tetrabutylammonium iodide (0.46g, 1.25 mmol) and sodium hydride (60% dispersion in mineral oil, 0.6 g, 15 mmol), and then a solution of (2*E*, 4*E*)-2,4-hexadien-1-ol (0.98 g, 10 mmol) in THF was slowly added. After 20 min, benzyl bromide (1.88 g, 11 mmol) were added. After 4 hours, the reaction was quenched with water and diluted with diethyl ether. The layers were separated, and the aqueous layer was extracted (2x) with diethyl ether. The combined organic portions were then washed with brine, dried over MgSO<sub>4</sub>, and the solvent was removed *in vacuo*. The crude product was purified by chromatography to give the product (*E,E*)-1-benzyloxy-2,4-hexadiene as a colorless oil (1.6 g, 85%).

**Step 2:** To a 100 mL RBF equipped with a stir bar was added methylene chloride (20

mL), (*E,E*)-1-benzyloxy-2,4-hexadiene (0.94 g, 5 mmol), Na<sub>2</sub>HPO<sub>4</sub> (1.2 g, equal mass with *m*-CPBA), and *m*-CPBA (85%, 1.2 g, 5.5 mmol). After 1 hour, the reaction was cooled to 0 °C and filtered through celite. It was then diluted with additional diethyl ether and washed with 1 M NaOH (1x), a saturated NaHCO<sub>3</sub> solution (2x), water, and dried over MgSO<sub>4</sub>. The solvent was removed *in vacuo* to give a clear oil (1.0 g, 98%) that was a 1.5:1 (**1c**:**1d**) mixture of regioisomers. The regioisomeric vinyl oxiranes could be separated by column chromatography (10-20% Et<sub>2</sub>O : 90-80% pentane).

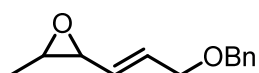

**(*E*)-2-(3-(Benzyloxy)prop-1-en-1-yl)-3-methyloxirane 1c (>20:1 dr):** <sup>1</sup>H NMR (400 MHz, CDCl<sub>3</sub>) δ 7.33 (d, *J* = 3.9 Hz, 5H), 6.02 (dt, *J* = 15.6, 5.6 Hz, 1H), 5.49 (ddt, *J* = 15.6, 7.9, 1.6 Hz, 1H), 4.51 (s, 2H), 4.03 (dd, *J* = 5.7, 1.6 Hz, 2H), 3.08 (dd, *J* = 7.9, 2.1 Hz, 1H), 2.91 (qd, *J* = 5.2, 2.2 Hz, 1H), 1.33 (d, *J* = 5.2 Hz, 3H). The other analytical data are in accordance with the literature.<sup>1</sup>

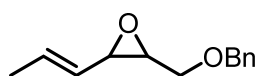

**(*E*)-2-((Benzyloxy)methyl)-3-(prop-1-en-1-yl)oxirane 1d (>20:1 dr):** <sup>1</sup>H NMR (400 MHz, CDCl<sub>3</sub>) δ 7.40 – 7.24 (m, 5H), 5.95 (dq, *J* = 15.4, 6.6 Hz, 1H), 5.21 (ddd, *J* = 15.4, 8.2, 1.7 Hz, 1H), 4.64 – 4.50 (m, 2H), 3.75 (dd, *J* = 11.5, 3.2 Hz, 1H), 3.51 (dd, *J* = 11.5, 5.5 Hz, 1H), 3.25 (dd, *J* = 8.3, 2.2 Hz, 1H), 3.10 (ddd, *J* = 5.5, 3.2, 2.2 Hz, 1H), 1.74 (dd, *J* = 6.6, 1.7 Hz, 3H). The other analytical data are in accordance with the literature.<sup>1</sup>

### General Procedure for the Synthesis of Vinyl Oxiranes 1f–i.<sup>2</sup>

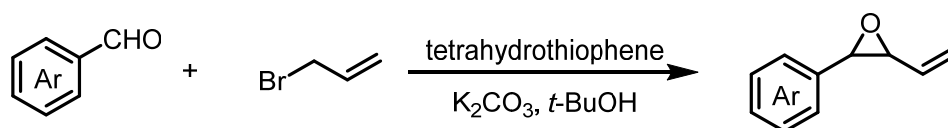

To a Schlenk tube were added tetrahydrothiophene (57 mg, 0.6 mmol), allylbromide (1.68 mL, 19.4 mmol), corresponding aromatic aldehyde (6.5 mmol), dry K<sub>2</sub>CO<sub>3</sub> (powdered, 1.07 g, 7.8 mmol) and *t*-BuOH (2 mL, was distilled over sodium) under

N<sub>2</sub> atmosphere. The resulting mixture was refluxed for 12 hours, and then filtered rapidly through a short silica gel column (ethyl acetate as the eluent). The filtrate was concentrated and the residue was purified by chromatography (hexane/ethyl acetate, 200/1, v/v) on silica gel to afford the desired product.

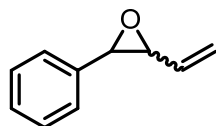

**2-Phenyl-3-vinyloxirane 1f (3:1 dr):** For major: <sup>1</sup>H NMR (400 MHz, CDCl<sub>3</sub>) δ 7.32 – 7.12 (m, 5H), 5.63 (ddd, *J* = 17.6, 10.1, 7.8 Hz, 1H), 5.48 – 5.37 (m, 1H), 5.24 (d, *J* = 10.4 Hz, 1H), 3.67 (s, 1H), 3.26 (d, *J* = 7.4 Hz, 1H). For minor: <sup>1</sup>H NMR (400 MHz, CDCl<sub>3</sub>) δ 7.32 – 7.12 (m, 5H), 5.50 – 5.39 (m, 1H), 5.36 – 5.27 (m, 1H), 5.17 (d, *J* = 10.2 Hz, 1H), 4.14 (d, *J* = 4.2 Hz, 1H), 3.56 (dd, *J* = 8.2, 4.3 Hz, 1H). The other analytical data are in accordance with the literature.<sup>2</sup>

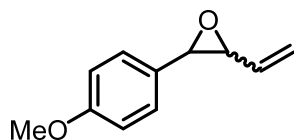

**2-(4-Methoxyphenyl)-3-vinyloxirane 1g (1:1 dr):** For major: <sup>1</sup>H NMR (400 MHz, CDCl<sub>3</sub>) δ 7.20 (d, *J* = 8.6 Hz, 2H), 6.88 (d, *J* = 8.4 Hz, 2H), 5.72 (ddd, *J* = 17.5, 10.3, 7.3 Hz, 1H), 5.57 – 5.46 (m, 1H), 5.35 – 5.19 (m, 1H), 3.79 (s, 3H), 3.71 (s, 1H), 3.35 (dd, *J* = 7.4, 1.9 Hz, 1H). For minor: <sup>1</sup>H NMR (400 MHz, CDCl<sub>3</sub>) δ 7.25 (d, *J* = 8.6 Hz, 2H), 6.88 (d, *J* = 8.4 Hz, 2H), 5.57 – 5.46 (m, 1H), 5.46 – 5.35 (m, 1H), 5.34 – 5.18 (m, 1H), 4.18 (d, *J* = 4.1 Hz, 1H), 3.79 (s, 3H), 3.61 (dd, *J* = 8.0, 4.1 Hz, 1H). The other analytical data are in accordance with the literature.<sup>2</sup>

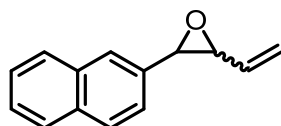

**2-(Naphthalen-2-yl)-3-vinyloxirane 1h (1.8:1 dr):** For major: <sup>1</sup>H NMR (400 MHz, CDCl<sub>3</sub>) δ 7.85 (m, 4H), 7.51 (m, 2H), 7.38 (dd, *J* = 8.6, 2.6 Hz, 1H), 5.92 – 5.69 (m, 1H), 5.67 – 5.54 (m, 1H), 5.40 (dd, *J* = 10.5, 2.9 Hz, 1H), 3.97 (s, 1H), 3.50 (dd, *J* =

7.7, 2.9 Hz, 1H).  $^{13}\text{C}$  NMR (101 MHz,  $\text{CDCl}_3$ )  $\delta$  135.2, 133.4, 133.1, 132.2, 128.5, 128.0, 127.9, 126.5, 126.2, 125.1, 122.9, 119.7, 63.1, 60.6. **For minor:**  $^1\text{H}$  NMR (400 MHz,  $\text{CDCl}_3$ )  $\delta$  7.85 (m, 4H), 7.51 (m, 3H), 5.67 – 5.52 (m, 1H), 5.52 – 5.43 (m, 1H), 5.28 (dd,  $J = 10.3, 2.6$  Hz, 1H), 4.44 (t,  $J = 3.1$  Hz, 1H), 3.80 – 3.66 (m, 1H).  $^{13}\text{C}$  NMR (101 MHz,  $\text{CDCl}_3$ )  $\delta$  134.6, 133.3, 133.1, 132.8, 128.0, 127.9, 126.4, 126.1, 125.5, 124.4, 122.1, 60.1, 59.1.

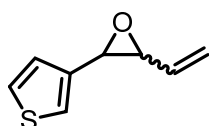

**2-(Thiophen-3-yl)-3-vinyloxirane 1i (2.2:1 dr):** **For major:**  $^1\text{H}$  NMR (400 MHz,  $\text{CDCl}_3$ )  $\delta$  7.28 (dd,  $J = 10.6, 3.5$  Hz, 2H), 6.98 (d,  $J = 4.9$  Hz, 1H), 5.70 (dt,  $J = 17.5, 8.8$  Hz, 1H), 5.52 (d,  $J = 16.7$  Hz, 1H), 5.32 (t,  $J = 9.7$  Hz, 1H), 3.83 (s, 1H), 3.46 (d,  $J = 7.3$  Hz, 1H).  $^{13}\text{C}$  NMR (101 MHz,  $\text{CDCl}_3$ )  $\delta$  139.0, 135.1, 126.5, 125.1, 122.5, 119.7, 62.3, 57.2. **For minor:**  $^1\text{H}$  NMR (400 MHz,  $\text{CDCl}_3$ )  $\delta$  7.28 (dd,  $J = 10.6, 3.5$  Hz, 1H), 7.22 (s, 1H), 7.05 (d,  $J = 5.1$  Hz, 1H), 5.52 (d,  $J = 16.7$  Hz, 2H), 5.32 (t,  $J = 9.7$  Hz, 1H), 4.23 (d,  $J = 4.1$  Hz, 1H), 3.62 (dd,  $J = 7.5, 4.2$  Hz, 1H).  $^{13}\text{C}$  NMR (101 MHz,  $\text{CDCl}_3$ )  $\delta$  136.8, 132.4, 126.0, 122.3, 121.9, 119.7, 59.7, 56.3.

#### IV. General Procedure for the Synthesis of Oxazolidinones and Characterization Data of Oxazolidinones

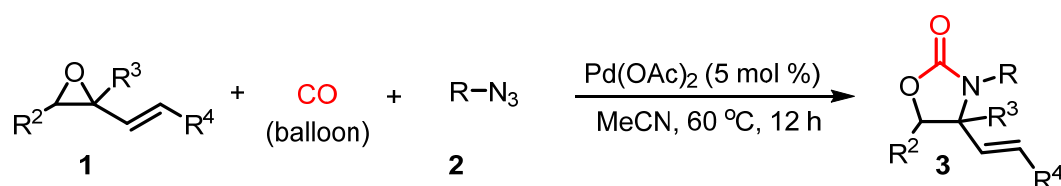

To an oven-dried Schlenk tube (10 mL) was added the organic azide **2** (0.5 mmol),  $\text{Pd}(\text{OAc})_2$  (5.6 mg, 5 mol%). The tube was purged and backfilled with CO (3 cycles) from a balloon. Anhydrous  $\text{CH}_3\text{CN}$  (3.0 mL) was injected into the tube, and then 2-vinyloxiranes **1** (0.75 mmol) was injected into the tube. After stirring at 60 °C for 12 h under CO atmosphere (balloon). The mixture was concentrated under reduced pressure. The residue was purified by column chromatography (petroleum

ether/EtOAc 4:1~2:1) to give the desired product.

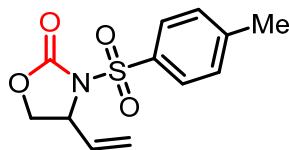

### 3-Tosyl-4-vinyloxazolidin-2-one 3a

Yield = 92% (123.0 mg). White solid.  $^1\text{H}$  NMR (400 MHz,  $\text{CDCl}_3$ )  $\delta$  7.91 (d,  $J$  = 8.4 Hz, 2H), 7.33 (d,  $J$  = 8.4 Hz, 2H), 5.81 (ddd,  $J$  = 16.8, 10.0, 8.4 Hz, 1H), 5.46 (d,  $J$  = 16.8 Hz, 1H), 5.37 (d,  $J$  = 10.0 Hz, 1H), 4.90 (td,  $J$  = 8.0, 3.6 Hz, 1H), 4.48 (t,  $J$  = 8.4 Hz, 1H), 4.03 (dd,  $J$  = 8.8, 4.0 Hz, 1H), 2.43 (s, 3H).  $^{13}\text{C}$  NMR (101 MHz,  $\text{CDCl}_3$ )  $\delta$  151.9, 145.7, 135.1, 133.7, 129.8, 128.7, 120.9, 68.2, 59.7, 21.8. The other analytical data are in accordance with the literature.<sup>3</sup>

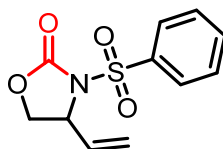

### 3-(Phenylsulfonyl)-4-vinyloxazolidin-2-one 3b

Yield = 87% (110.6 mg). White solid.  $^1\text{H}$  NMR (400 MHz,  $\text{CDCl}_3$ )  $\delta$  8.04 – 8.02 (m, 2H), 7.69 – 7.61 (m, 1H), 7.56 – 7.52 (m, 2H), 5.80 (ddd,  $J$  = 16.8, 10.0, 8.4 Hz, 1H), 5.46 (d,  $J$  = 17.2 Hz, 1H), 5.37 (d,  $J$  = 10.0 Hz, 1H), 4.92 (td,  $J$  = 8.4, 4.0 Hz, 1H), 4.49 (t,  $J$  = 8.8 Hz, 1H), 4.04 (dd,  $J$  = 8.8, 3.6 Hz, 1H). The other analytical data are in accordance with the literature.<sup>3</sup>

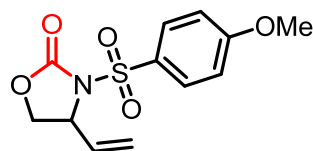

### 3-((4-Methoxyphenyl)sulfonyl)-4-vinyloxazolidin-2-one 3c

Yield = 89% (126.1 mg). White solid.  $^1\text{H}$  NMR (400 MHz,  $\text{CDCl}_3$ )  $\delta$  7.95 (d,  $J$  = 8.8 Hz, 2H), 6.98 (d,  $J$  = 8.8 Hz, 2H), 5.81 (ddd,  $J$  = 16.8, 10.0, 8.4 Hz, 1H), 5.46 (d,  $J$  = 16.8 Hz, 1H), 5.37 (d,  $J$  = 10.0 Hz, 1H), 4.89 (td,  $J$  = 8.0, 3.6 Hz, 1H), 4.47 (t,  $J$  = 8.8 Hz, 1H), 4.03 (dd,  $J$  = 8.8, 4.0 Hz, 1H), 3.87 (s, 3H);  $^{13}\text{C}$  NMR (100 MHz,  $\text{CDCl}_3$ )  $\delta$

164.4, 152.0, 133.8, 131.1, 129.4, 120.7, 114.3, 68.1, 59.7, 55.8. HRMS (ESI) calculated for C<sub>12</sub>H<sub>14</sub>NO<sub>5</sub>S (M+H)<sup>+</sup> 284.0587, found 284.0583.

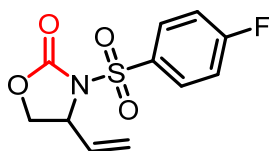

### 3-((4-Fluorophenyl)sulfonyl)-4-vinyloxazolidin-2-one 3d

Yield = 77% (104.5 mg). White solid. <sup>1</sup>H NMR (400 MHz, CDCl<sub>3</sub>) δ 8.09 – 8.04 (m, 2H), 7.24 – 7.18 (m, 2H), 5.80 (ddd, *J* = 16.8, 10.0, 8.4 Hz, 1H), 5.48 (d, *J* = 16.8 Hz, 1H), 5.39 (d, *J* = 10.0 Hz, 1H), 4.92 (td, *J* = 8.4, 3.6 Hz, 1H), 4.52 (t, *J* = 8.8 Hz, 1H), 4.06 (dd, *J* = 8.8, 3.6 Hz, 1H). The other analytical data are in accordance with the literature.<sup>3</sup>

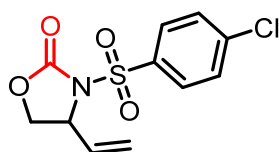

### 3-((4-Chlorophenyl)sulfonyl)-4-vinyloxazolidin-2-one 3e

Yield = 64% (92.1 mg). White solid. <sup>1</sup>H NMR (400 MHz, CDCl<sub>3</sub>) δ 7.98 (d, *J* = 8.8 Hz, 2H), 7.51 (d, *J* = 8.8 Hz, 2H), 5.80 (ddd, *J* = 16.8, 10.0, 8.4 Hz, 1H), 5.48 (d, *J* = 16.8 Hz, 1H), 5.40 (d, *J* = 10.0 Hz, 1H), 4.92 (td, *J* = 8.4, 3.6 Hz, 1H), 4.52 (t, *J* = 8.4 Hz, 1H), 4.06 (dd, *J* = 8.8, 3.6 Hz, 1H). The other analytical data are in accordance with the literature.<sup>3</sup>

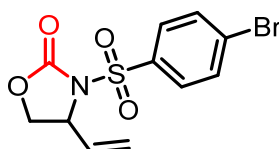

### 3-((4-Bromophenyl)sulfonyl)-4-vinyloxazolidin-2-one 3f

Yield = 62% (103.0 mg). White solid. <sup>1</sup>H NMR (400 MHz, CDCl<sub>3</sub>) δ 7.89 (d, *J* = 8.8 Hz, 2H), 7.68 (d, *J* = 8.8 Hz, 2H), 5.79 (ddd, *J* = 16.8, 10.0, 8.4 Hz, 1H), 5.48 (d, *J* = 16.8 Hz, 1H), 5.39 (d, *J* = 10.0 Hz, 1H), 4.92 (td, *J* = 8.4, 3.6 Hz, 1H), 4.52 (t, *J* = 8.4 Hz, 1H), 4.06 (dd, *J* = 8.8, 3.6 Hz, 1H); <sup>13</sup>C NMR (100 MHz, CDCl<sub>3</sub>) δ 151.7, 137.0,



133.4, 132.5, 130.3, 129.9, 121.3, 68.3, 59.7. HRMS (ESI) calculated for  $C_{11}H_{11}BrNO_4S$  ( $M+H$ )<sup>+</sup> 331.9587, found 331.9585.

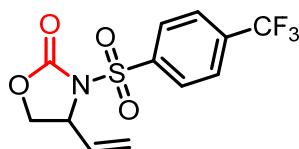

### 3-((4-(Trifluoromethyl)phenyl)sulfonyl)-4-vinyloxazolidin-2-one 3g

Yield = 51% (81.9 mg). White solid. <sup>1</sup>H NMR (400 MHz, CDCl<sub>3</sub>) δ 8.18 (d, *J* = 8.4 Hz, 2H), 7.81 (d, *J* = 8.4 Hz, 2H), 5.80 (ddd, *J* = 16.8, 10.0, 8.4 Hz, 1H), 5.51 (d, *J* = 16.8 Hz, 1H), 5.42 (d, *J* = 10.0 Hz, 1H), 4.96 (td, *J* = 8.4, 3.6 Hz, 1H), 4.55 (t, *J* = 8.8 Hz, 1H), 4.09 (dd, *J* = 8.8, 3.6 Hz, 1H). <sup>13</sup>C NMR (100 MHz, CDCl<sub>3</sub>) δ 151.6, 141.5, 136.0 (q, *J* = 33.1 Hz), 133.2, 129.4, 126.3 (q, *J* = 3.7 Hz), 123.2 (q, *J* = 271.5 Hz), 121.6, 68.4, 59.8. HRMS (ESI) calculated for  $C_{12}H_{10}F_3NO_4SNa$  ( $M+Na$ )<sup>+</sup> 344.0175, found 344.0167.

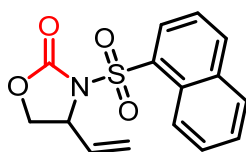

### 3-(Naphthalen-1-ylsulfonyl)-4-vinyloxazolidin-2-one 3h

Yield = 74% (112.2 mg). White solid. <sup>1</sup>H NMR (400 MHz, CDCl<sub>3</sub>) δ 8.73 (d, *J* = 8.4 Hz, 1H), 8.46 (d, *J* = 7.2 Hz, 1H), 8.14 (d, *J* = 8.4 Hz, 1H), 7.96 (d, *J* = 8.4 Hz, 1H), 7.72 – 7.68 (m, 1H), 7.64 – 7.57 (m, 2H), 5.89 (ddd, *J* = 16.8, 10.0, 8.0 Hz, 1H), 5.52 (d, *J* = 16.8 Hz, 1H), 5.37 (d, *J* = 10.0 Hz, 1H), 5.02 (td, *J* = 8.0, 4.4 Hz, 1H), 4.39 (t, *J* = 8.4 Hz, 1H), 4.02 (dd, *J* = 8.8, 4.4 Hz, 1H). <sup>13</sup>C NMR (100 MHz, CDCl<sub>3</sub>) δ 151.6, 136.2, 134.2, 133.9, 133.3, 132.6, 129.4, 129.0, 128.5, 127.2, 124.2, 124.0, 120.6, 67.8, 59.9. HRMS (ESI) calcd for  $C_{15}H_{14}NO_4S$  ( $M+H$ )<sup>+</sup> 304.0638, found 304.0638.

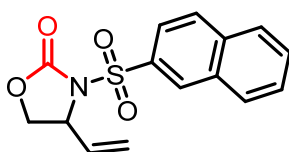

### 3-(Naphthalen-2-ylsulfonyl)-4-vinyloxazolidin-2-one 3i

Yield = 72% (114.3 mg). White solid.  $^1\text{H}$  NMR (400 MHz,  $\text{CDCl}_3$ )  $\delta$  8.61 (s, 1H), 7.99 – 7.94 (m, 3H), 7.89 (d,  $J$  = 8.0 Hz, 1H), 7.67 – 7.58 (m, 2H), 5.81 (ddd,  $J$  = 16.8, 10.0, 8.4 Hz, 1H), 5.49 (d,  $J$  = 16.8 Hz, 1H), 5.37 (d,  $J$  = 10.0 Hz, 1H), 4.96 (td,  $J$  = 8.4, 4.0 Hz, 1H), 4.48 (t,  $J$  = 8.8 Hz, 1H), 4.02 (dd,  $J$  = 8.8, 4.0 Hz, 1H).  $^{13}\text{C}$  NMR (100 MHz,  $\text{CDCl}_3$ )  $\delta$  151.9, 135.6, 134.8, 133.7, 131.9, 130.9, 129.7, 129.4, 128.0, 127.8, 122.8, 120.9, 120.8, 68.2, 59.7. HRMS (ESI) calcd for  $\text{C}_{15}\text{H}_{14}\text{NO}_4\text{S}$  ( $\text{M}+\text{H}$ ) $^+$  304.0638, found 304.0646.

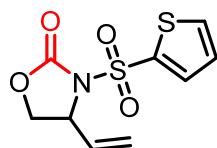

### 3-(Thiophen-2-ylsulfonyl)-4-vinyloxazolidin-2-one 3j

Yield = 67% (86.9 mg). Colorless oil.  $^1\text{H}$  NMR (400 MHz,  $\text{CDCl}_3$ )  $\delta$  7.86 (dd,  $J$  = 4.0, 1.6 Hz, 1H), 7.72 (dd,  $J$  = 4.8, 1.6 Hz, 1H), 7.13 (dd,  $J$  = 4.8, 4.0 Hz, 1H), 5.87 (ddd,  $J$  = 16.8, 10.0, 8.4 Hz, 1H), 5.48 (d,  $J$  = 16.8 Hz, 1H), 5.40 (d,  $J$  = 10.0 Hz, 1H), 4.90 (td,  $J$  = 8.4, 4.0 Hz, 1H), 4.50 (t,  $J$  = 8.4 Hz, 1H), 4.07 (dd,  $J$  = 8.8, 4.0 Hz, 1H).  $^{13}\text{C}$  NMR (100 MHz,  $\text{CDCl}_3$ )  $\delta$  151.6, 137.7, 135.8, 134.8, 133.2, 127.7, 121.2, 68.1, 60.0. HRMS (ESI) calcd for  $\text{C}_9\text{H}_9\text{NO}_4\text{S}_2\text{Na}$  ( $\text{M}+\text{Na}$ ) $^+$  281.9865, found 281.9866.

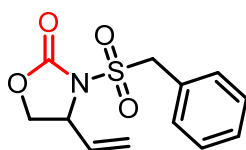

### 3-(Benzylsulfonyl)-4-vinyloxazolidin-2-one 3k

Yield = 77% (102.6 mg). White solid.  $^1\text{H}$  NMR (400 MHz,  $\text{CDCl}_3$ )  $\delta$  7.42 – 7.37 (m, 5H), 5.30 (ddd,  $J$  = 16.8, 10.0, 8.0 Hz, 1H), 5.17 (d,  $J$  = 16.8 Hz, 1H), 5.07 (d,  $J$  = 10.0 Hz, 1H), 4.74 – 4.63 (m, 2H), 4.33 – 4.26 (m, 2H), 4.00 – 3.92 (m, 1H).  $^{13}\text{C}$  NMR (100 MHz,  $\text{CDCl}_3$ )  $\delta$  152.9, 133.1, 131.1, 129.6, 129.1, 127.4, 120.2, 68.5, 59.3, 58.8. HRMS (ESI) calcd for  $\text{C}_{12}\text{H}_{14}\text{NO}_4\text{S}$  ( $\text{M}+\text{H}$ ) $^+$  268.0638, found 268.0635.

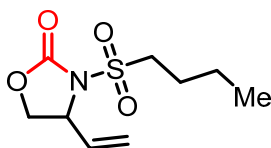

### 3-(Butylsulfonyl)-4-vinyloxazolidin-2-one 3l

Yield = 71% (82.9 mg). White solid.  $^1\text{H}$  NMR (400 MHz,  $\text{CDCl}_3$ )  $\delta$  5.93 (ddd,  $J = 16.8, 10.0, 8.4$  Hz, 1H), 5.46 (d,  $J = 16.8$  Hz, 1H), 5.39 (d,  $J = 10.0$  Hz, 1H), 4.85 (td,  $J = 8.4, 4.0$  Hz, 1H), 4.56 (t,  $J = 8.8$  Hz, 1H), 4.13 (dd,  $J = 8.8, 3.6$  Hz, 1H), 3.51 – 3.28 m, 2H), 1.85 – 1.75 (m, 2H), 1.50 – 1.40 (m, 2H), 0.93 (t,  $J = 7.6$  Hz, 3H).  $^{13}\text{C}$  NMR (100 MHz,  $\text{CDCl}_3$ )  $\delta$  152.7, 133.6, 121.1, 68.5, 58.8, 53.7, 24.7, 21.4, 13.5. HRMS(ESI) calcd for  $\text{C}_9\text{H}_{16}\text{NO}_4\text{S}$  ( $\text{M}+\text{H}$ ) $^+$  234.0795, found 234.0803.

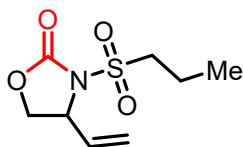

### 3-(Propylsulfonyl)-4-vinyloxazolidin-2-one 3m

Yield = 77% (84.9 mg). Colorless oil.  $^1\text{H}$  NMR (400 MHz,  $\text{CDCl}_3$ )  $\delta$  5.93 (ddd,  $J = 16.8, 10.0, 8.4$  Hz, 1H), 5.46 (d,  $J = 16.8$  Hz, 1H), 5.40 (d,  $J = 10.0$  Hz, 1H), 4.85 (td,  $J = 8.4, 3.6$  Hz, 1H), 4.56 (t,  $J = 8.8$  Hz, 1H), 4.14 (dd,  $J = 8.8, 3.6$  Hz, 1H), 3.49 – 3.27 (m, 2H), 1.92 – 1.81 (m, 2H), 1.05 (t,  $J = 7.2$  Hz, 3H).  $^{13}\text{C}$  NMR (100 MHz,  $\text{CDCl}_3$ )  $\delta$  152.7, 133.5, 121.2, 68.5, 58.8, 55.6, 16.6, 12.8. HRMS (ESI) calcd for  $\text{C}_8\text{H}_{14}\text{NO}_4\text{S}$  ( $\text{M}+\text{H}$ ) $^+$  220.0638, found 220.0636.

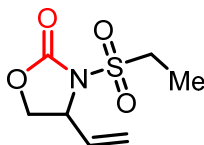

### 3-(Ethylsulfonyl)-4-vinyloxazolidin-2-one 3n

Yield = 68% (69.8 mg). Colorless oil.  $^1\text{H}$  NMR (400 MHz,  $\text{CDCl}_3$ )  $\delta$  5.94 (ddd,  $J = 16.8, 10.0, 8.4$  Hz, 1H), 5.48 (d,  $J = 16.8$  Hz, 1H), 5.42 (d,  $J = 10.0$  Hz, 1H), 4.87 (td,  $J = 8.4, 3.6$  Hz, 1H), 4.58 (t,  $J = 8.8$  Hz, 1H), 4.16 (dd,  $J = 8.8, 3.6$  Hz, 1H), 3.57 – 3.36 (m, 2H), 1.41 (t,  $J = 7.2$  Hz, 3H).  $^{13}\text{C}$  NMR (100 MHz,  $\text{CDCl}_3$ )  $\delta$  152.7, 133.5,

121.4, 68.5, 58.9, 48.5, 7.6. HRMS (ESI) calcd for C<sub>7</sub>H<sub>11</sub>NO<sub>4</sub>SNa (M+Na)<sup>+</sup> 228.0301, found 228.0291.

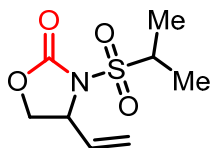

### 3-(Isopropylsulfonyl)-4-vinyloxazolidin-2-one 3o

Yield = 65% (71.3 mg). Colorless oil. <sup>1</sup>H NMR (400 MHz, CDCl<sub>3</sub>) δ 5.94 (ddd, *J* = 16.8, 10.0, 8.4 Hz, 1H), 5.47 (d, *J* = 16.8 Hz, 1H), 5.40 (d, *J* = 10.0 Hz, 1H), 4.86 (td, *J* = 8.4, 4.0 Hz, 1H), 4.58 (t, *J* = 8.8 Hz, 1H), 4.16 (dd, *J* = 8.8, 4.0 Hz, 1H), 3.87 (hept, *J* = 6.8 Hz, 1H), 1.44 (d, *J* = 6.8 Hz, 3H), 1.41 (d, *J* = 6.8 Hz, 3H). <sup>13</sup>C NMR (100 MHz, CDCl<sub>3</sub>) δ 152.9, 133.9, 121.2, 68.5, 59.0, 54.6, 16.2, 15.9. HRMS (ESI) calcd for C<sub>8</sub>H<sub>14</sub>NO<sub>4</sub>S (M+H)<sup>+</sup> 220.0638, found 220.0629.

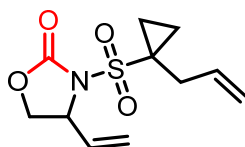

### 3-((1-Allylcyclopropyl)sulfonyl)-4-vinyloxazolidin-2-one 3p

Yield = 62% (79.8 mg). Colorless oil. <sup>1</sup>H NMR (400 MHz, CDCl<sub>3</sub>) δ 5.96 (ddd, *J* = 16.8, 10.0, 8.0 Hz, 1H), 5.79 – 5.67 (m, 1H), 5.45 (d, *J* = 16.8 Hz, 1H), 5.38 (d, *J* = 10.0 Hz, 1H), 5.18 – 5.10 (m, 2H), 4.81 (td, *J* = 8.0, 4.0 Hz, 1H), 4.53 (t, *J* = 8.4 Hz, 1H), 4.11 (dd, *J* = 8.8, 4.0 Hz, 1H), 2.80 (dd, *J* = 15.2, 8.0 Hz, 1H), 2.52 (ddt, *J* = 15.2, 6.4, 1.6 Hz, 1H), 1.74 – 1.63 (m, 2H), 1.06 – 0.94 (m, 2H). <sup>13</sup>C NMR (100 MHz, CDCl<sub>3</sub>) δ 152.4, 134.5, 132.6, 120.4, 119.2, 68.3, 59.4, 40.7, 34.8, 12.0, 11.9. HRMS(ESI) calcd for C<sub>11</sub>H<sub>16</sub>NO<sub>4</sub>S (M+H)<sup>+</sup> 258.0795, found 258.0795.

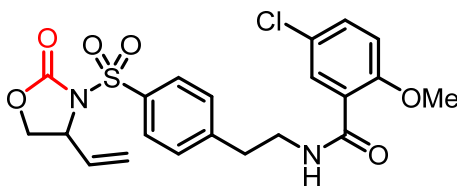

### 5-Chloro-2-methoxy-N-(4-((2-oxo-4-vinyloxazolidin-3-yl)sulfonyl)phenethyl)benzamide

### amide 3q

Yield = 77% (179.0 mg). White solid.  $^1\text{H}$  NMR (400 MHz,  $\text{CDCl}_3$ )  $\delta$  8.13 (d,  $J = 2.8$  Hz, 1H), 7.97 (d,  $J = 8.0$  Hz, 2H), 7.81 (t,  $J = 5.6$  Hz, 1H), 7.41 (d,  $J = 8.0$  Hz, 2H), 7.36 (dd,  $J = 8.8, 2.8$  Hz, 1H), 6.87 (d,  $J = 8.8$  Hz, 1H), 5.81 (ddd,  $J = 16.8, 10.0, 8.4$  Hz, 1H), 5.47 (d,  $J = 16.8$  Hz, 1H), 5.38 (d,  $J = 10.0$  Hz, 1H), 4.91 (td,  $J = 8.4, 4.0$  Hz, 1H), 4.49 (t,  $J = 8.4$  Hz, 1H), 4.04 (dd,  $J = 8.8, 4.0$  Hz, 1H), 3.79 (s, 3H), 3.77 – 3.70 (m, 2H), 3.01 (t,  $J = 6.8$  Hz, 2H).  $^{13}\text{C}$  NMR (100 MHz,  $\text{CDCl}_3$ )  $\delta$  164.1, 156.1, 151.8, 146.9, 136.2, 133.6, 132.5, 132.0, 129.7, 129.0, 126.8, 122.8, 121.0, 113.0, 68.2, 59.7, 56.4, 40.6, 35.8. HRMS (ESI) calcd for  $\text{C}_{21}\text{H}_{22}\text{ClN}_2\text{O}_6\text{S}$  ( $\text{M}+\text{H}$ ) $^+$  465.0882, found 465.0872.

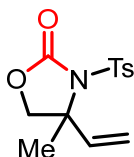

### 4-Methyl-3-tosyl-4-vinyloxazolidin-2-one 3r

Yield = 88% (123.7 mg). White solid.  $^1\text{H}$  NMR (400 MHz,  $\text{CDCl}_3$ )  $\delta$  7.92 (d,  $J = 8.0$  Hz, 2H), 7.31 (d,  $J = 8.0$  Hz, 2H), 6.08 (dd,  $J = 17.6, 10.8$  Hz, 1H), 5.43 – 5.35 (m, 2H), 4.10 (d,  $J = 8.8$  Hz, 1H), 3.99 (d,  $J = 8.8$  Hz, 1H), 2.42 (s, 3H), 1.81 (s, 3H).  $^{13}\text{C}$  NMR (100 MHz,  $\text{CDCl}_3$ )  $\delta$  152.3, 145.4, 138.2, 135.7, 129.5, 129.0, 117.2, 74.5, 66.1, 23.4, 21.7. The other analytical data are in accordance with the literature.<sup>4</sup>

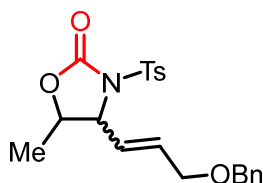

### (*E*)-4-(3-(Benzyloxy)prop-1-en-1-yl)-5-methyl-3-tosyloxazolidin-2-one 3s (3:1 dr)

Yield = 54% (108.4 mg). White solid. **For major:**  $^1\text{H}$  NMR (400 MHz,  $\text{CDCl}_3$ )  $\delta$  7.89 (d,  $J = 8.0$  Hz, 2H), 7.39 – 7.30 (m, 5H), 7.26 (d,  $J = 8.0$  Hz, 2H), 5.99 (dt,  $J = 15.6, 4.8$  Hz, 1H), 5.71 (dd,  $J = 15.6, 8.8$  Hz, 1H), 4.55 (s, 2H), 4.43 (dd,  $J = 8.8, 4.4$  Hz, 1H), 4.30 – 4.24 (m, 1H), 4.06 (d,  $J = 5.2$  Hz, 2H), 2.40 (s, 3H), 1.39 (d,  $J = 6.4$  Hz, 3H).  $^{13}\text{C}$  NMR (100 MHz,  $\text{CDCl}_3$ )  $\delta$  151.4, 145.5, 138.0, 135.1, 133.4, 129.7, 128.6,

128.6, 127.9, 127.8, 127.0, 76.9, 72.8, 69.1, 65.5, 21.8, 19.4. **For minor:**  $^1\text{H}$  NMR (400 MHz,  $\text{CDCl}_3$ )  $\delta$  7.87 (d,  $J = 8.0$  Hz, 2H), 7.39 – 7.30 (m, 5H), 7.22 (d,  $J = 8.0$  Hz, 2H), 6.81 (dd,  $J = 15.6, 8.4$  Hz, 1H), 6.16 (d,  $J = 15.6$  Hz, 1H), 5.53 (dd,  $J = 15.6, 9.6$  Hz, 1H), 5.25 – 5.17 (m, 2H), 4.81 (dt,  $J = 40.8, 6.8$  Hz, 2H), 2.37 (s, 3H), 1.25 (d,  $J = 6.4$  Hz, 3H).  $^{13}\text{C}$  NMR (100 MHz,  $\text{CDCl}_3$ )  $\delta$  146.0, 141.5, 135.2, 129.9, 129.6, 128.9, 128.8, 128.6, 127.7, 125.5, 123.2, 75.9, 75.4, 66.9, 64.1, 63.4, 15.3. The other analytical data are in accordance with the literature.<sup>5</sup>

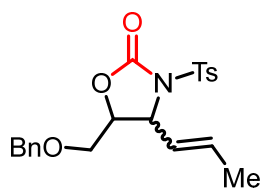

**(E)-5-((Benzyloxy)methyl)-4-(prop-1-en-1-yl)-3-tosyloxazolidin-2-one 3t (1.8:1 dr)**

Yield = 57% (114.4 mg). White solid. **For major:**  $^1\text{H}$  NMR (400 MHz,  $\text{CDCl}_3$ )  $\delta$  7.85 (d,  $J = 8.0$  Hz, 2H), 7.36 – 7.23 (m, 7H), 5.88 (dq,  $J = 13.6, 6.4$  Hz, 1H), 5.43 (dd,  $J = 15.2, 8.4$  Hz, 1H), 4.77 – 4.70 (m, 1H), 4.52 – 4.43 (m, 2H), 4.22 – 4.20 (m, 1H), 3.59 – 3.47 (m, 2H), 2.39 (s, 3H), 1.73 (d,  $J = 6.4$  Hz, 3H).  $^{13}\text{C}$  NMR (100 MHz,  $\text{CDCl}_3$ )  $\delta$  151.6, 145.3, 137.2, 135.4, 134.5, 132.5, 129.5, 128.6, 128.5, 127.8, 122.5, 78.9, 73.6, 68.7, 61.1, 21.7, 17.7. **For minor:**  $^1\text{H}$  NMR (400 MHz,  $\text{CDCl}_3$ )  $\delta$  7.85 (d,  $J = 8.0$  Hz, 2H), 7.36 – 7.23 (m, 7H), 5.88 (dq,  $J = 13.6, 6.4$  Hz, 1H), 5.17 (dd,  $J = 14.0, 9.6$  Hz, 1H), 4.92 – 4.87 (m, 1H), 4.77 – 4.70 (m, 1H), 4.52 – 4.43 (m, 2H), 3.59 – 3.47 (m, 2H), 2.42 (s, 3H), 1.69 (d,  $J = 6.4$  Hz, 3H).  $^{13}\text{C}$  NMR (100 MHz,  $\text{CDCl}_3$ )  $\delta$  151.3, 145.4, 137.3, 135.5, 129.5, 128.8, 128.5, 128.0, 128.0, 127.7, 127.3, 79.0, 73.6, 67.5, 62.1, 55.6, 17.7, 13.2. HRMS(ESI) calcd for  $\text{C}_{21}\text{H}_{24}\text{NO}_5\text{S}$  ( $\text{M}+\text{H}$ )<sup>+</sup> 402.1370, found 402.1362.

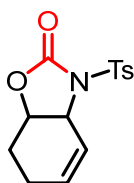

**3-Tosyl-3a,6,7,7a-tetrahydrobenzo[d]oxazol-2(3H)-one 3u**

Yield = 62% (90.9 mg). White solid.  $^1\text{H}$  NMR (400 MHz,  $\text{CDCl}_3$ )  $\delta$  7.94 (d,  $J = 8.4$

Hz, 2H), 7.33 (d,  $J = 8.4$  Hz, 2H), 6.11 – 6.05 (m, 1H), 5.98 – 5.93 (m, 1H), 4.88 – 4.80 (m, 2H), 2.43 (s, 3H), 2.20 – 2.13 (m, 2H), 2.03 – 1.96 (m, 1H), 1.81 – 1.72 (m, 1H). The other analytical data are in accordance with the literature.<sup>4</sup>

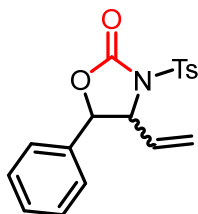

### 5-Phenyl-3-tosyl-4-vinylloxazolidin-2-one 3v (2.6:1 dr)

Yield = 71% (121.9 mg). White solid. **For major:** <sup>1</sup>H NMR (400 MHz, CDCl<sub>3</sub>) 7.90 (d,  $J = 8.0$  Hz, 2H), 7.39 – 7.32 (m, 5H), 7.22 – 7.17 (m, 2H), 5.96 (ddd,  $J = 17.6, 10.0, 8.4$  Hz, 1H), 5.46 – 5.41 (m, 1H), 5.23 – 5.09 (m, 2H), 4.69 (dd,  $J = 8.4, 4.8$  Hz, 1H), 2.46 (s, 3H). <sup>13</sup>C NMR (100 MHz, CDCl<sub>3</sub>)  $\delta$  151.6, 145.7, 136.5, 134.9, 133.7, 129.8, 129.2, 128.6, 126.0, 125.4, 121.1, 80.7, 67.3, 21.8. **For minor:** <sup>1</sup>H NMR (400 MHz, CDCl<sub>3</sub>)  $\delta$  7.95 (d,  $J = 8.0$  Hz, 2H), 7.39 – 7.32 (m, 5H), 7.22 – 7.17 (m, 2H), 5.75 (d,  $J = 7.2$  Hz, 1H), 5.46 – 5.41 (m, 2H), 5.23 – 5.09 (m, 2H), 2.44 (s, 3H). <sup>13</sup>C NMR (100 MHz, CDCl<sub>3</sub>)  $\delta$  151.5, 145.7, 135.1, 132.6, 130.5, 129.7, 129.6, 129.0, 128.7, 122.0, 19.8, 64.6, 21.8. The other analytical data are in accordance with the literature.<sup>6</sup>

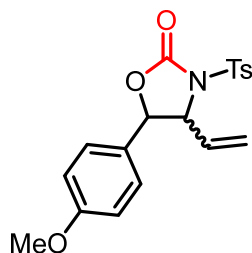

### 5-(4-Methoxyphenyl)-3-tosyl-4-vinylloxazolidin-2-one 3w (2.6:1 dr)

Yield = 75% (140.0 mg). White solid. **For major:** <sup>1</sup>H NMR (400 MHz, CDCl<sub>3</sub>)  $\delta$  7.91 (d,  $J = 8.0$  Hz, 2H), 7.34 (d,  $J = 8.0$  Hz, 2H), 7.13 (d,  $J = 8.4$  Hz, 2H), 6.87 (d,  $J = 8.4$  Hz, 2H), 5.93 (ddd,  $J = 17.6, 10.0, 8.0$  Hz, 1H), 5.43 – 5.37 (m, 1H), 5.26 – 5.22 (m, 1H), 5.04 (d,  $J = 4.8$  Hz, 1H), 4.67 (dd,  $J = 8.4, 4.8$  Hz, 1H), 3.81 (s, 3H), 2.46 (s, 3H). <sup>13</sup>C NMR (100 MHz, CDCl<sub>3</sub>)  $\delta$  160.6, 151.6, 145.7, 135.0, 133.8, 129.8, 128.6, 127.2, 121.0, 114.6, 114.1, 80.9, 67.3, 55.5, 21.8. **For minor:** <sup>1</sup>H NMR (400 MHz, CDCl<sub>3</sub>)  $\delta$  7.94 (d,  $J = 8.0$  Hz, 2H), 7.32 (d,  $J = 8.0$  Hz, 2H), 7.09 (d,  $J = 8.8$  Hz, 2H), 6.85 (d,  $J$

= 8.8 Hz, 2H), 5.69 (d,  $J = 7.2$  Hz, 1H), 5.43 – 5.37 (m, 2H), 5.14 – 5.11 (m, 1H), 4.95 – 4.90 (m, 1H), 3.78 (s, 3H), 2.44 (s, 3H).  $^{13}\text{C}$  NMR (100 MHz,  $\text{CDCl}_3$ )  $\delta$  160.0, 151.6, 145.6, 135.2, 130.7, 129.7, 129.0, 128.2, 127.6, 124.5, 121.8, 79.8, 64.8, 55.4, 21.8. HRMS(ESI) calcd for  $\text{C}_{19}\text{H}_{20}\text{NO}_5\text{S}$  ( $\text{M}+\text{H}$ ) $^+$  374.1057, found 374.1056.

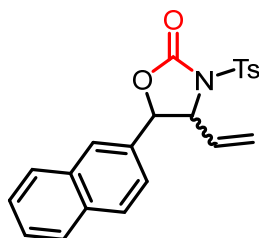

### 5-(Naphthalen-2-yl)-3-tosyl-4-vinyloxazolidin-2-one 3x (2.5:1 dr)

Yield = 74% (145.6 mg). White solid. **For major:**  $^1\text{H}$  NMR (400 MHz,  $\text{CDCl}_3$ )  $\delta$  7.87 – 7.78 (m, 4H), 7.75 – 7.71 (m, 1H), 7.61 (s, 1H), 7.53 – 7.51 (m, 2H), 7.26 – 7.18 (m, 3H), 6.07 – 5.98 (m, 1H), 5.48 – 5.44 (m, 1H), 5.29 – 5.20 (m, 2H), 4.76 (dd,  $J = 7.2$ , 4.4 Hz, 1H), 2.40 (s, 3H).  $^{13}\text{C}$  NMR (100 MHz,  $\text{CDCl}_3$ )  $\delta$  151.7, 145.7, 134.8, 133.8, 133.7, 133.5, 132.9, 129.8, 129.5, 128.5, 128.2, 127.6, 127.1, 127.0, 125.0, 122.2, 121.0, 80.9, 67.3, 21.8. **For minor:**  $^1\text{H}$  NMR (400 MHz,  $\text{CDCl}_3$ )  $\delta$  7.98 – 7.95 (m, 1H), 7.87 – 7.78 (m, 4H), 7.53 – 7.51 (m, 2H), 7.33 – 7.30 (m, 1H), 7.26 – 7.18 (m, 3H), 5.90 – 5.88 (m, 1H), 5.49 – 5.44 (m, 2H), 5.29 – 5.20 (m, 1H), 5.05 – 5.26 (m, 1H), 2.42 (s, 3H).  $^{13}\text{C}$  NMR (100 MHz,  $\text{CDCl}_3$ )  $\delta$  151.5, 145.7, 135.1, 133.3, 132.9, 130.4, 130.0, 129.7, 129.0, 128.6, 128.1, 127.8, 126.8, 126.8, 125.4, 123.3, 79.8, 64.6. HRMS(ESI) calcd for  $\text{C}_{22}\text{H}_{20}\text{NO}_4\text{S}$  ( $\text{M}+\text{H}$ ) $^+$  394.1108, found 394.1096.

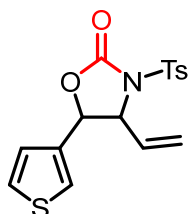

### 5-(Thiophen-3-yl)-3-tosyl-4-vinyloxazolidin-2-one 3y (2.0:1 dr)

Yield = 54% (94.3 mg). Yellow oil. **For major:**  $^1\text{H}$  NMR (400 MHz,  $\text{CDCl}_3$ )  $\delta$  7.89 (d,  $J = 8.4$ , 2H), 7.38 – 7.32 (m, 3H), 7.22 – 7.09 (m, 1H), 6.99 – 83 (m, 1H), 5.98 – 5.88 (m, 1H), 5.49 – 5.28 (m, 2H), 5.23 – 5.16 (m, 1H), 4.81 – 4.67 (m, 1H), 2.45 (s, 3H).  $^{13}\text{C}$  NMR (100 MHz,  $\text{CDCl}_3$ )  $\delta$  151.4, 145.8, 137.3, 134.9, 133.5, 129.8, 128.1, 125.4, 124.4, 123.6, 121.2, 77.5, 66.6, 21.8. **For minor:**  $^1\text{H}$  NMR (400 MHz,  $\text{CDCl}_3$ )  $\delta$  7.94 (d,  $J = 8.0$ , 2H), 7.49 – 7.47 (m, 1H), 7.38 – 7.32 (m, 2H), 7.22 – 7.10 (m, 1H), 6.99 –



6.83 (m, 1H), 5.80 – 5.78 (m, 1H), 5.49 – 5.29 (m, 2H), 5.23 – 5.16 (m, 1H), 5.10 – 5.07 (m, 1H), 2.44 (s, 3H). <sup>13</sup>C NMR (100 MHz, CDCl<sub>3</sub>) δ 151.4, 145.7, 135.1, 133.6, 130.5, 129.7, 129.0, 127.0, 125.4, 123.4, 122.1, 77.3, 64.3, 21.8. HRMS(ESI) calcd for C<sub>16</sub>H<sub>15</sub>NO<sub>4</sub>S<sub>2</sub>Na (M+Na)<sup>+</sup> 372.0335, found 372.0331.

## V. Synthetic Applications

### Scale-up reaction

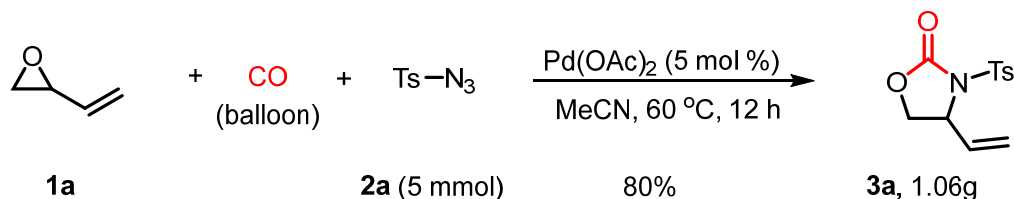

To an oven-dried Schlenk tube (50 mL) was added the organic azide **2a** (5 mmol, 0.99 g), Pd(OAc)<sub>2</sub> (56 mg, 5 mol %). The tube was purged and backfilled with CO (3 cycles) from a balloon. Anhydrous CH<sub>3</sub>CN (5.0 mL) was injected into the tube, and then 2-vinyloxiranes **1a** (7.5 mmol, 0.53 g) was injected into the tube. After stirring at 60 °C for 12 h under CO atmosphere (balloon). The mixture was concentrated under reduced pressure. The residue was purified by column chromatography (petroleum ether/EtOAc 4:1~2:1) to give the desired product **3a** in 80% yield (1.06 g).

### Derivatization of Oxazolidinones **3a**

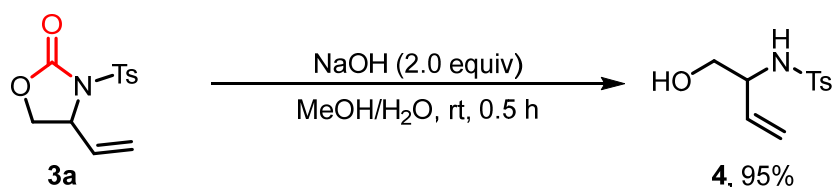

To an oven-dried Schlenk tube (10 mL) was added the **3a** (133.7 mg, 0.5 mmol), NaOH (40.0 mg, 1.0 mmol), and MeOH/H<sub>2</sub>O (4/1, 3.0 mL). After stirring at 25 °C for 0.5 h. The mixture was extracted with EtOAc (3x10 mL), and the organic extracts were combined, dried over Na<sub>2</sub>SO<sub>4</sub> and concentrated under reduced pressure. The residue was purified by column chromatography (petroleum ether/EtOAc 3:1) to give the desired product **4** in 95% yield (120.7 mg) as a colorless oil. <sup>1</sup>H NMR (400 MHz, CDCl<sub>3</sub>) δ 7.76 (d, *J* = 8.0 Hz, 2H), 7.28 (d, *J* = 8.0 Hz, 2H), 5.76 (d, *J* = 7.6 Hz, 1H), 5.59 (ddd, *J* = 16.8, 10.4, 6.4 Hz, 1H), 5.09 – 5.02 (m, 2H), 3.87 (brs, 1H), 3.63 – 3.52 (m, 2H), 3.00 (brs, 1H), 2.41 (s, 3H). <sup>13</sup>C NMR (100 MHz, CDCl<sub>3</sub>) δ 143.5, 137.5, 134.4, 129.7, 127.3, 117.9, 64.8, 57.9, 21.6. The other analytical data are in

accordance with the literature.<sup>7</sup>

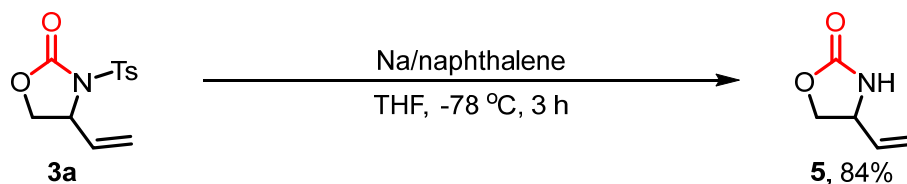

To a stirred solution of naphthalene (0.65 g, 5 mmol) in THF (10 mL) was added sodium (0.175g, 7.5 mmol) at room temperature, and the mixture was stirred for 1h to give a deep green solution of sodium naphthalenide. To a stirred solution of **3a** (133.7 mg, 0.5 mmol) in THF (3 mL) was added the sodium naphthalenide solution (4 mL) at  $-78\text{ }^\circ\text{C}$ , and the mixture was stirred for 3 h at  $-78\text{ }^\circ\text{C}$ . Saturated aqueous  $\text{NaHCO}_3$  was added to quench the reaction, and the mixture was extracted with EtOAc. And the organic extracts were combined, dried over  $\text{Na}_2\text{SO}_4$  and concentrated under reduced pressure. The residue was purified by column chromatography (petroleum ether/EtOAc 1:1) to give the desired product **5** in 84% yield (47.5 mg) as a yellow oil.  $^1\text{H}$  NMR (400 MHz,  $\text{CDCl}_3$ )  $\delta$  6.43 (brs, 1H), 5.80 (ddd,  $J = 16.8, 10.0, 7.2$  Hz, 1H), 5.32 – 5.21 (m, 2H), 4.52 (t,  $J = 8.4$  Hz, 1H), 4.40 – 4.34 (m, 1H), 4.04 (t,  $J = 7.6$  Hz, 1H).  $^{13}\text{C}$  NMR (100 MHz,  $\text{CDCl}_3$ )  $\delta$  160.1, 135.8, 118.7, 70.1, 55.3. The other analytical data are in accordance with the literature.<sup>8</sup>

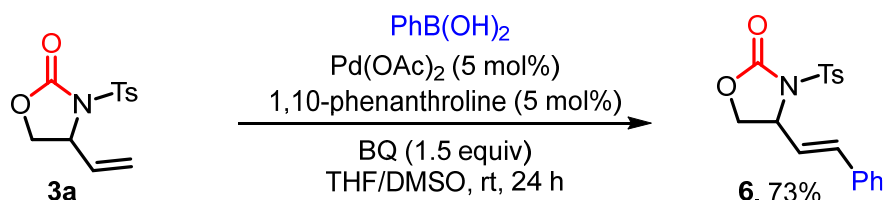

To an oven-dried Schlenk tube (10 mL) was added the **3a** (133.7 mg, 0.5 mmol),  $\text{PhB(OH)}_2$  (91.4 mg, 0.75 mmol),  $\text{Pd(OAc)}_2$  (5.6 mg, 5 mol%), 1,10-phenanthroline (4.5 mg, 5 mol%), benzoquinone (54.1 mg, 0.75 mmol) and THF/DMSO (1:1, 3.0 mL). After stirring at room temperature for 24 h. The mixture was washed with a solution of 1 M NaOH, and extracted with EtOAc. The organic extracts were combined, dried over  $\text{Na}_2\text{SO}_4$  and concentrated under reduced pressure. The residue was purified by column chromatography (petroleum ether/EtOAc 10:1) to give the desired product **6** in 73% yield (125.3 mg) as a white solid.  $^1\text{H}$  NMR (400 MHz,  $\text{CDCl}_3$ )  $\delta$  7.86 (d,  $J = 8.0$  Hz, 2H), 7.36 – 7.30 (m, 5H), 7.21 (d,  $J = 8.0$  Hz, 2H), 6.76 (d,  $J = 15.6$  Hz, 1H), 6.02 – 5.95 (m, 1H), 5.12 – 5.07 (m, 1H), 4.56 (t,  $J = 8.4$  Hz, 1H), 4.14 – 4.10 (m, 1H), 2.40 (s, 3H).  $^{13}\text{C}$  NMR (100 MHz,  $\text{CDCl}_3$ )  $\delta$  151.8, 145.6,

136.2, 135.3, 135.1, 129.7, 129.1, 128.9, 128.9, 127.0, 123.7, 68.4, 59.8, 21.8. The other analytical data are in accordance with the literature.<sup>7</sup>

**Reference:**

1. Brichacek, M., Batory, L. and Njardarson, J. *Angew. Chem. Int. Ed.* **2010**, 49, 1648-1651.
2. Li, K.; Deng, X.-M. and Tang, Y. *Chem. Commun.* **2003**, 2074-2075.
3. Overman, L. E. and Remarchuk, T. P. *J. Am. Chem. Soc.* **2002**, 124, 12-13.
4. Trost, B. M. and Sudhakar, A. R. *J. Am. Chem. Soc.* **1987**, 109, 3792-3794.
5. Olofsson, B. and Somfai, P. *J. Org. Chem.* **2002**, 67, 8574-8583.
6. Xu, D. and Sharpless, K. B. *Tetrahedron Lett.* **1993**, 34, 951-952.
7. Joosten, A.; Persson, A. K. A.; Millet, R.; Johnson, M. T. and Backvall, J. *Chem. Eur. J.* **2012**, 18, 15151-15157.
8. Derrien, N.; Sharley, J. S.; Rubtsov, A. E. and Malkov, A. V. *Org. Lett.* **2017**, 19, 234-237.

## VI. Copy of NMR Spectra

### $^1\text{H}$ NMR (400 MHz, $\text{CDCl}_3$ ) Spectrum of (*E*)-2-(3-(benzyloxy)prop-1-en-1-yl)-3-methyloxirane **1c**

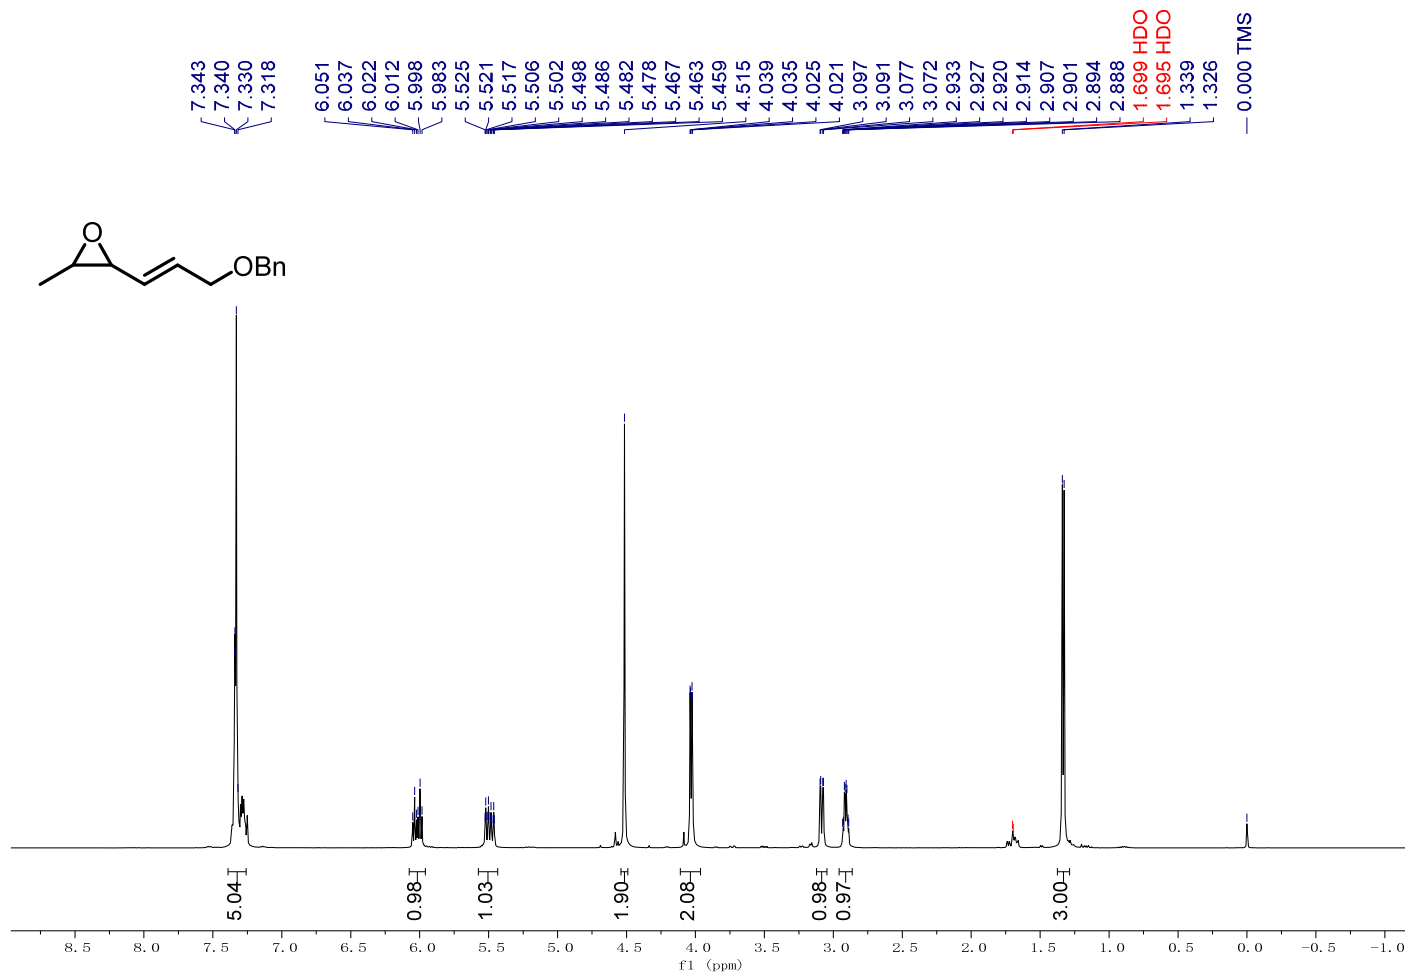

<sup>1</sup>H NMR (400 MHz, CDCl<sub>3</sub>) Spectrum of (*E*)-2-((benzyloxy)methyl)-3-(prop-1-en-1-yl)oxirane 1d

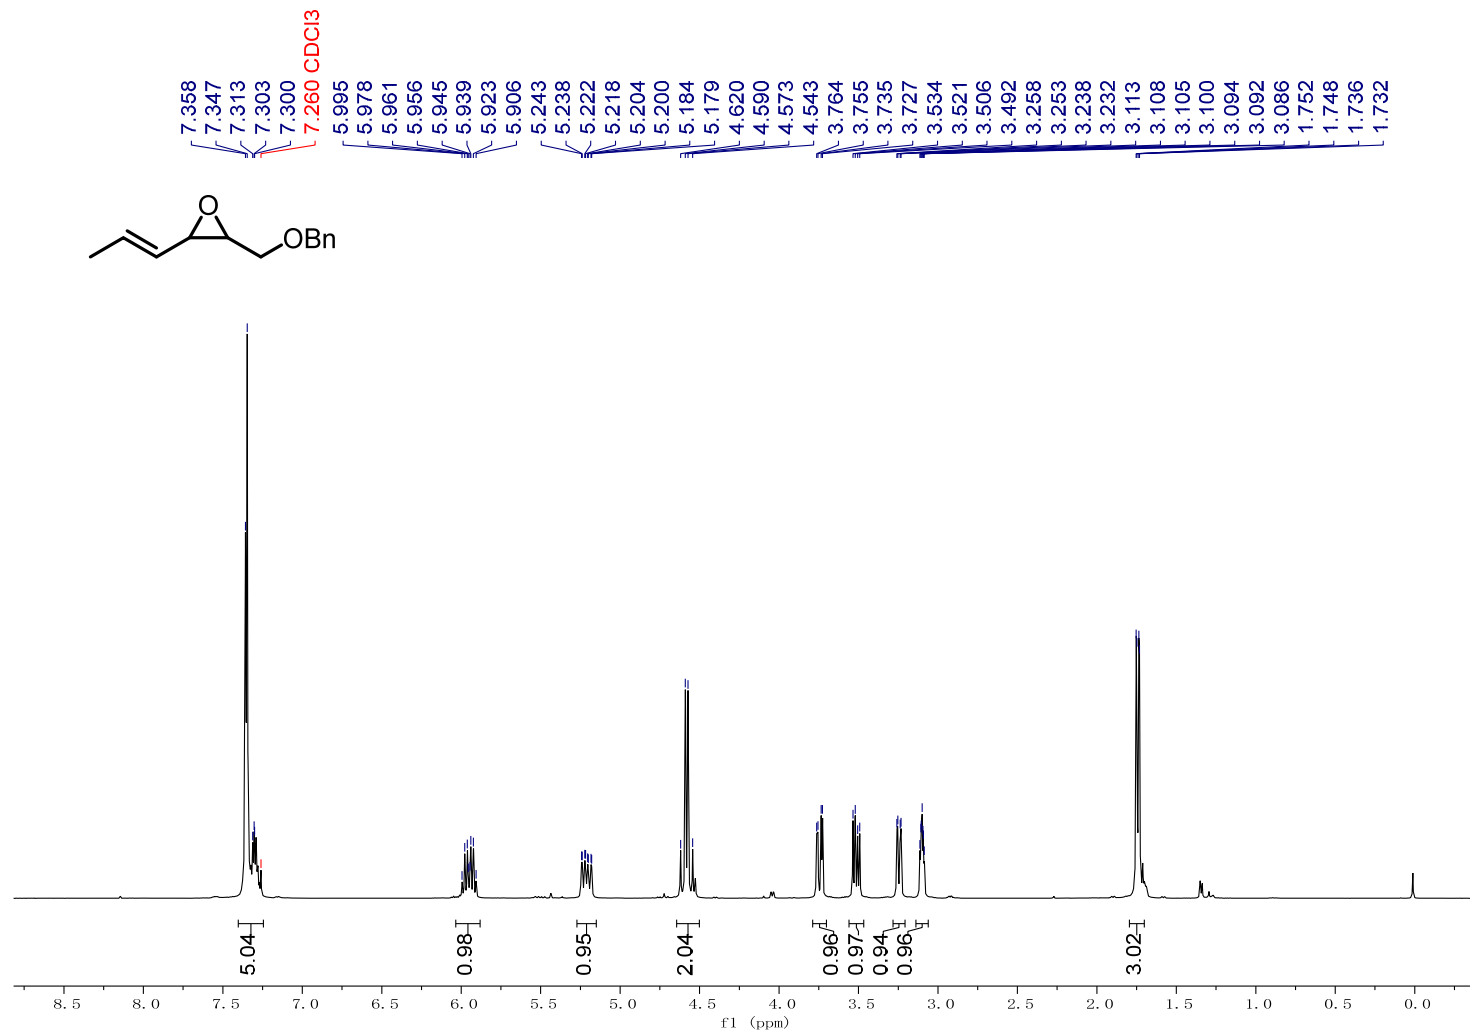

**<sup>1</sup>H NMR (400 MHz, CDCl<sub>3</sub>) Spectrum of 2-phenyl-3-vinylloxirane 1f**

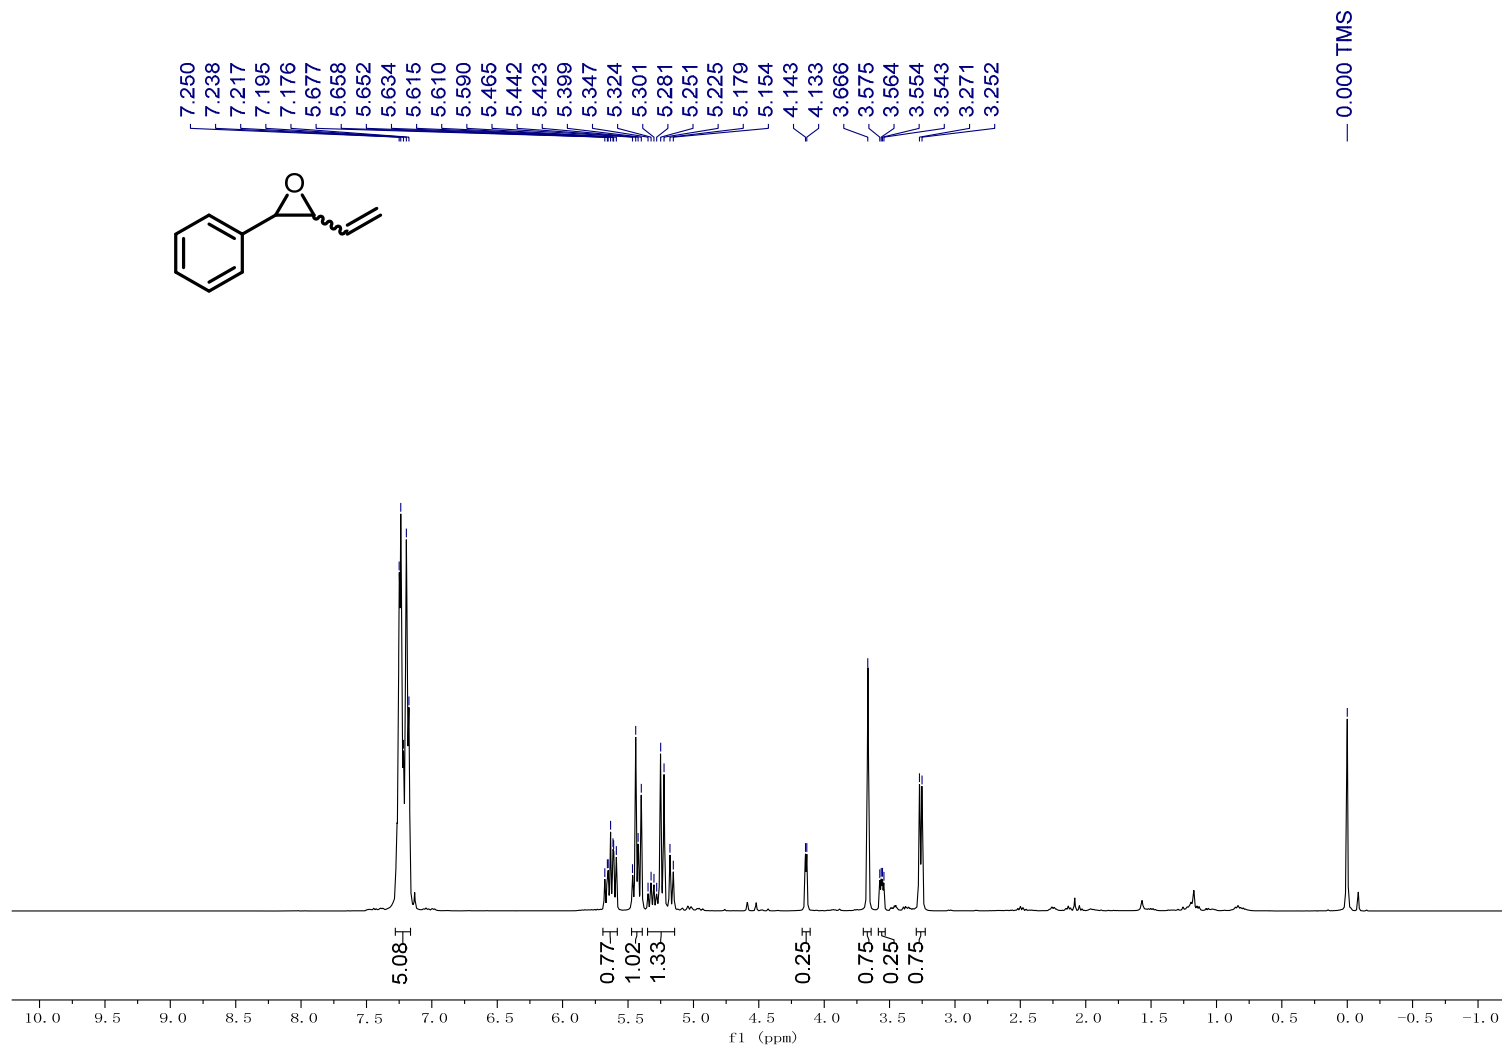

**<sup>1</sup>H NMR (400 MHz, CDCl<sub>3</sub>) Spectrum of 2-(4-methoxyphenyl)-3-vinylloxirane 1g**

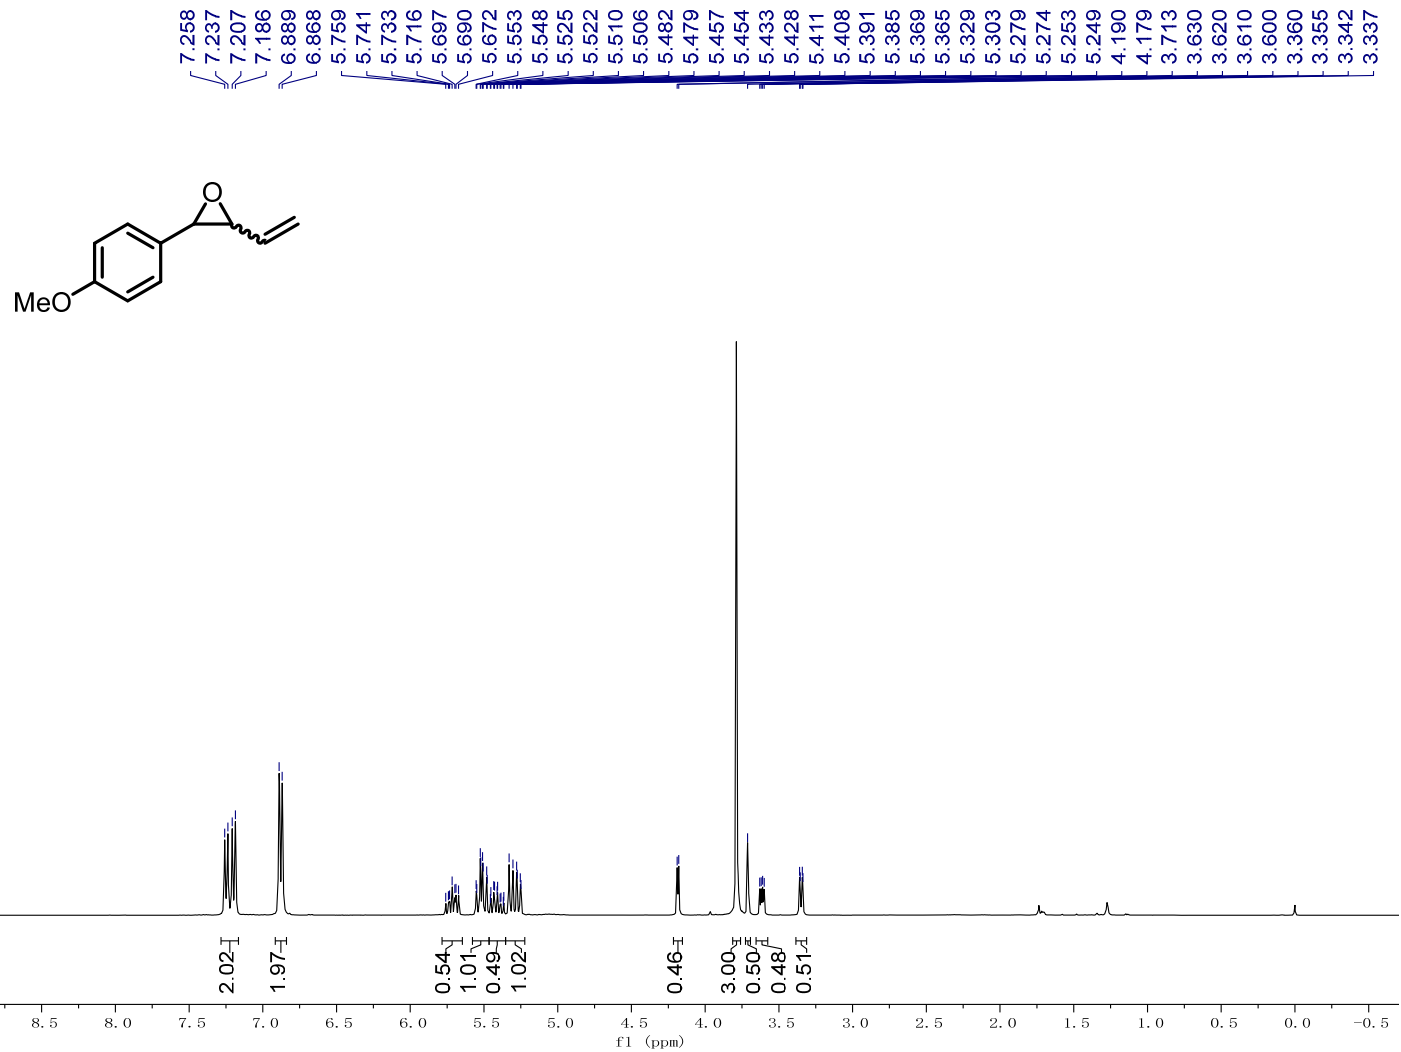

**<sup>1</sup>H NMR (400 MHz, CDCl<sub>3</sub>) Spectrum of 2-(naphthalen-2-yl)-3-vinylloxirane 1h**

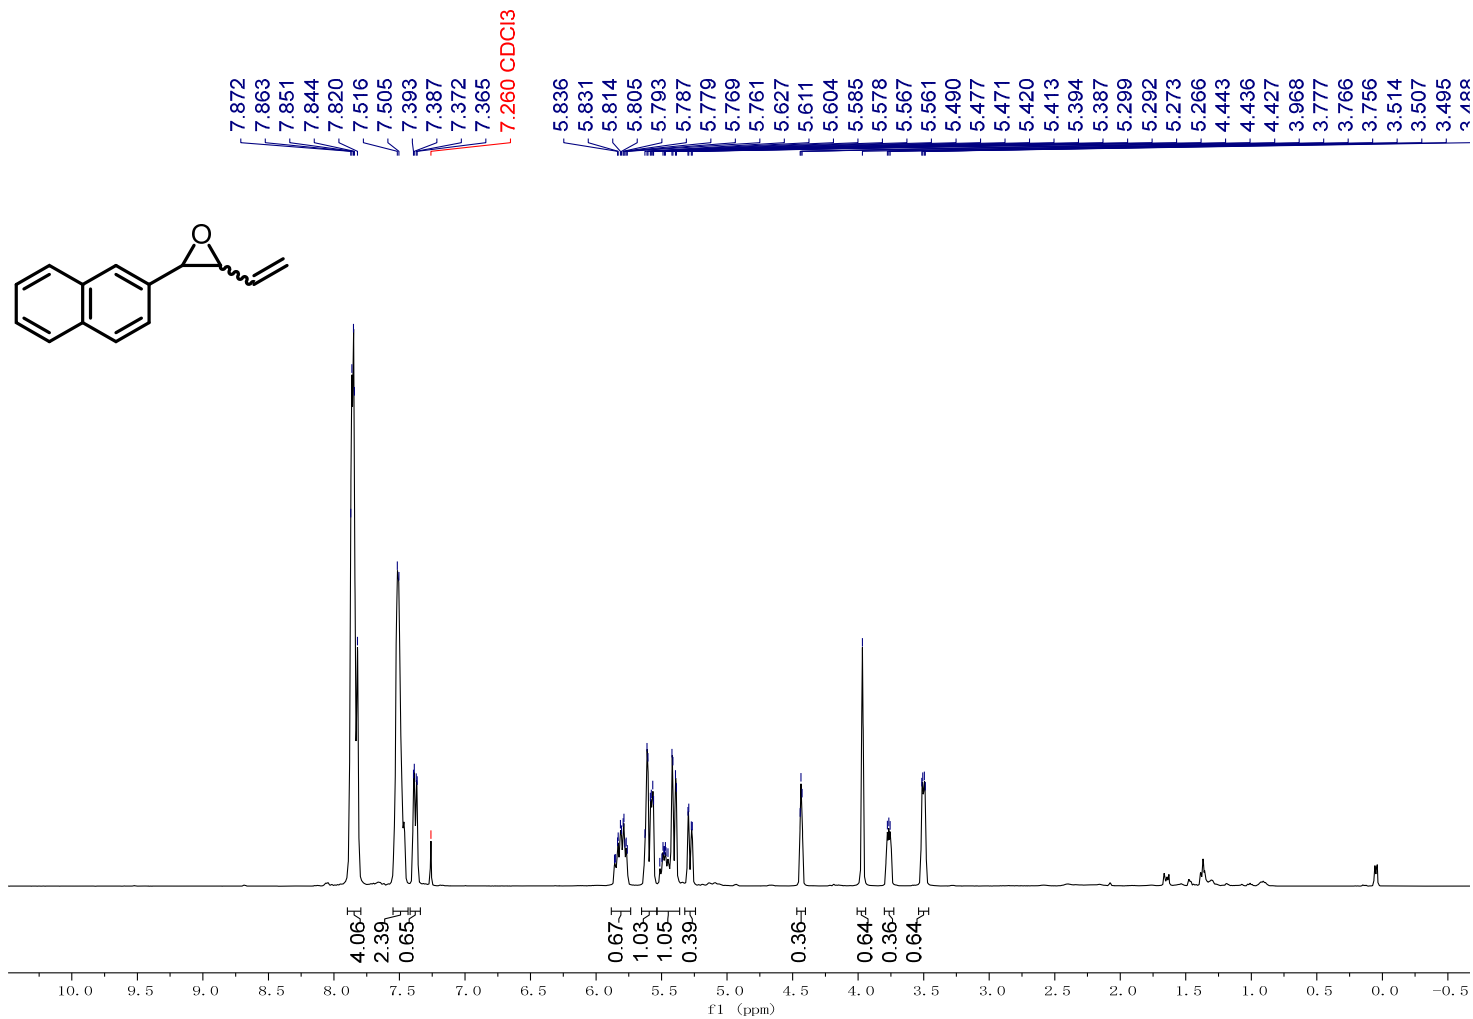



<sup>13</sup>C NMR (100 MHz, CDCl<sub>3</sub>) Spectrum of 2-(naphthalen-2-yl)-3-vinyloxirane 1h

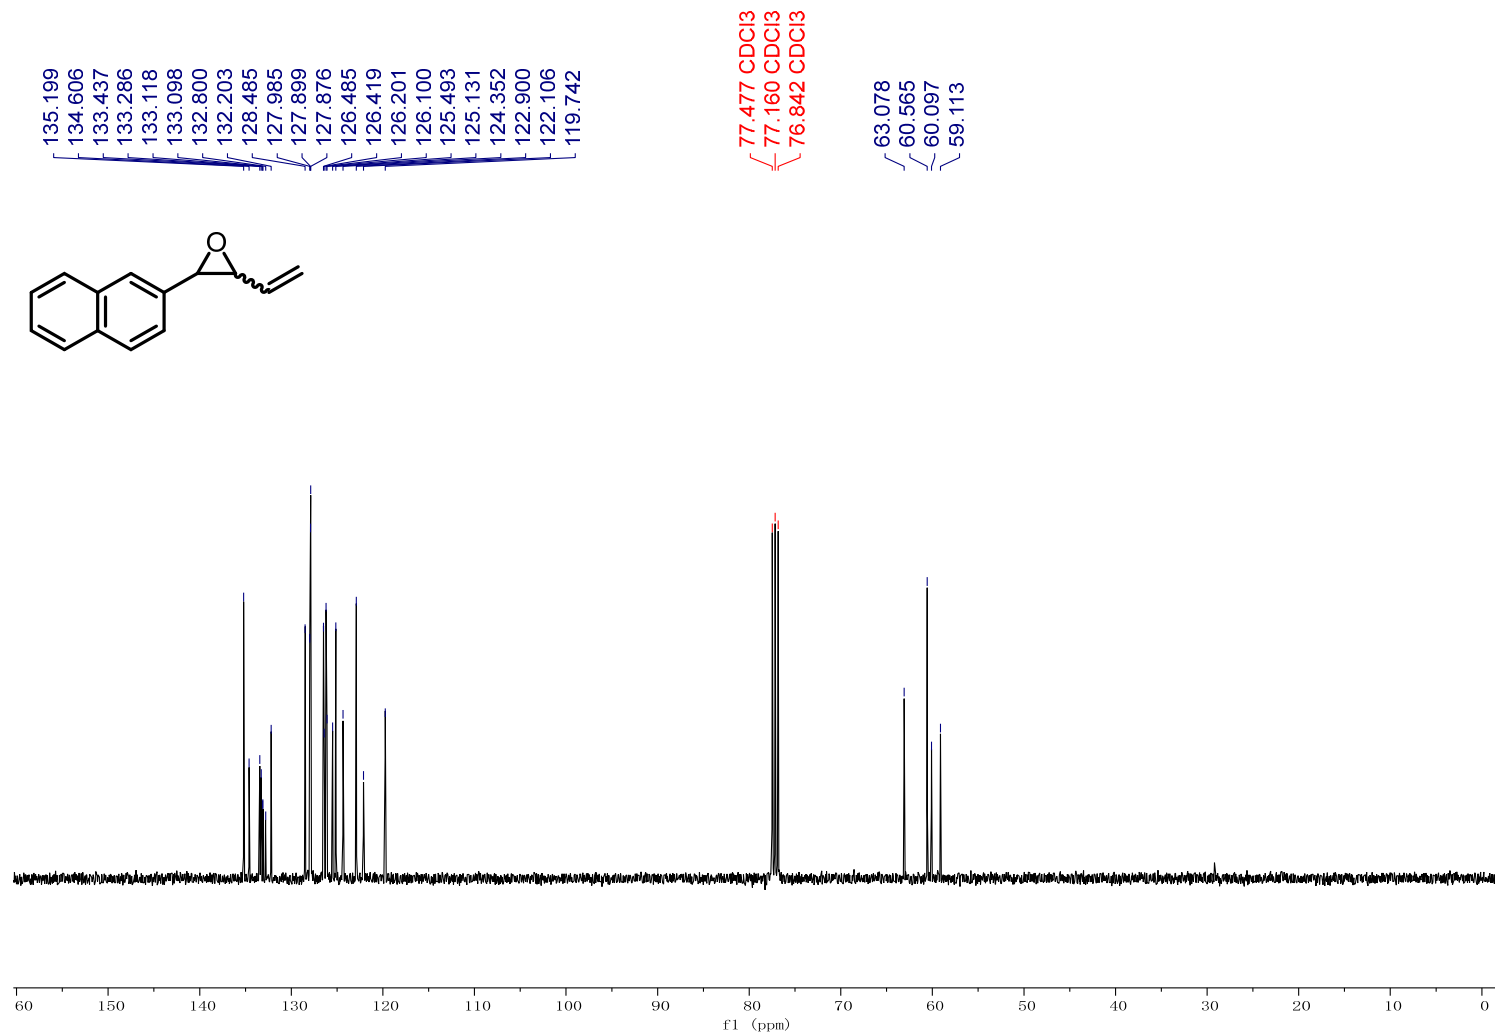

**<sup>1</sup>H NMR (400 MHz, CDCl<sub>3</sub>) Spectrum of 2-(thiophen-3-yl)-3-vinyloxirane 1i**

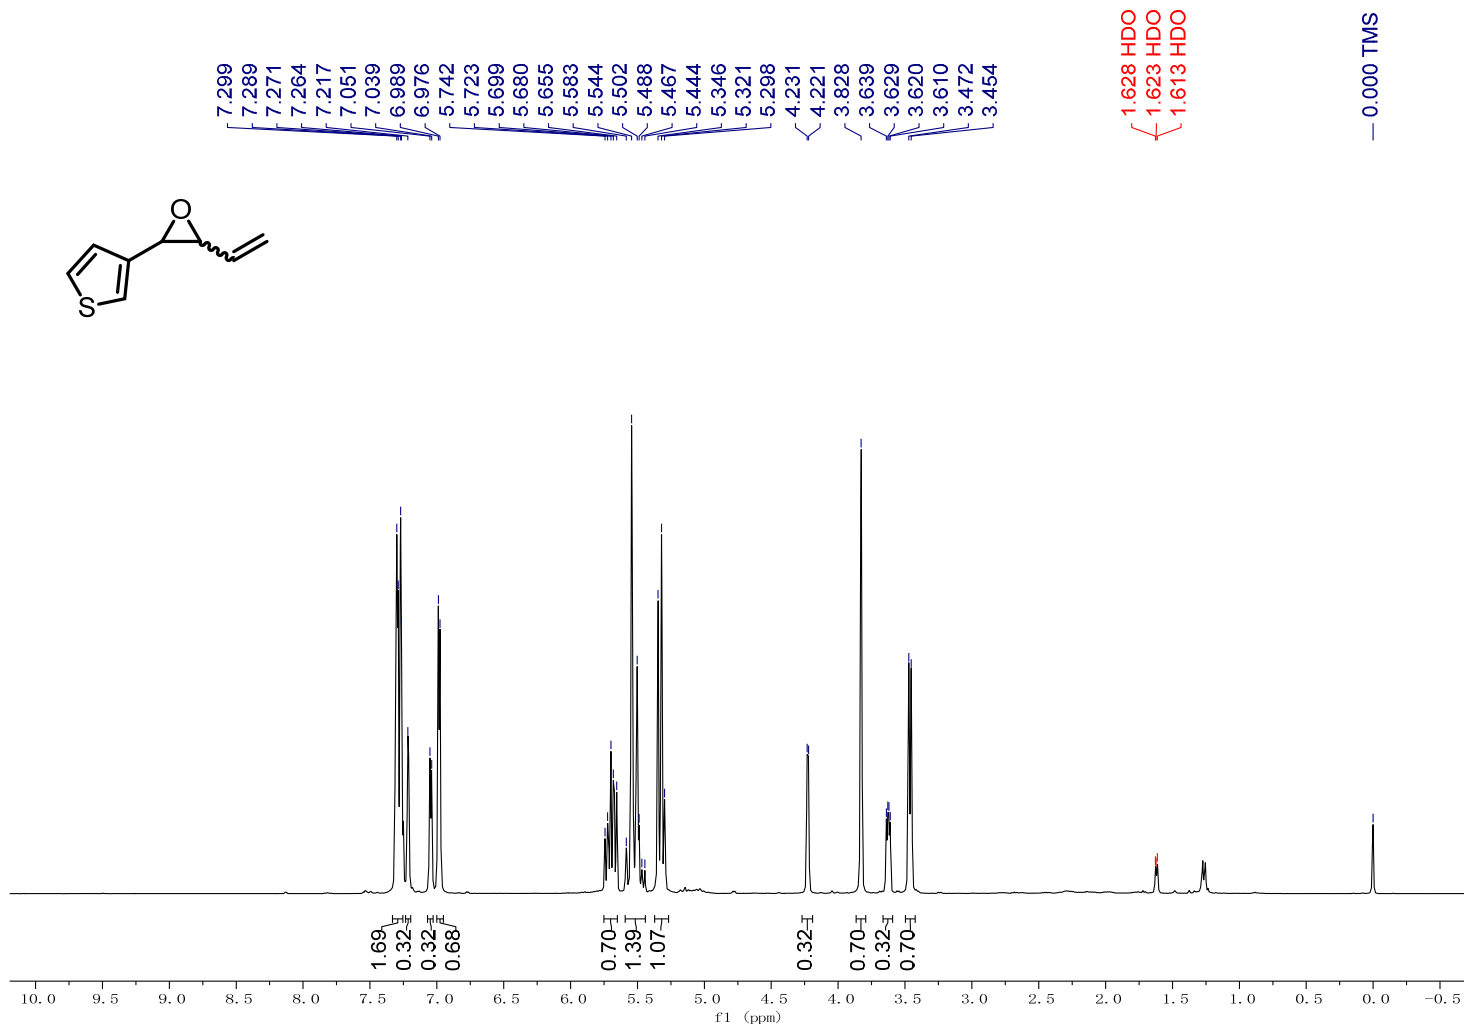

<sup>13</sup>C NMR (100 MHz, CDCl<sub>3</sub>) Spectrum of 2-(thiophen-3-yl)-3-vinyloxirane **1i**

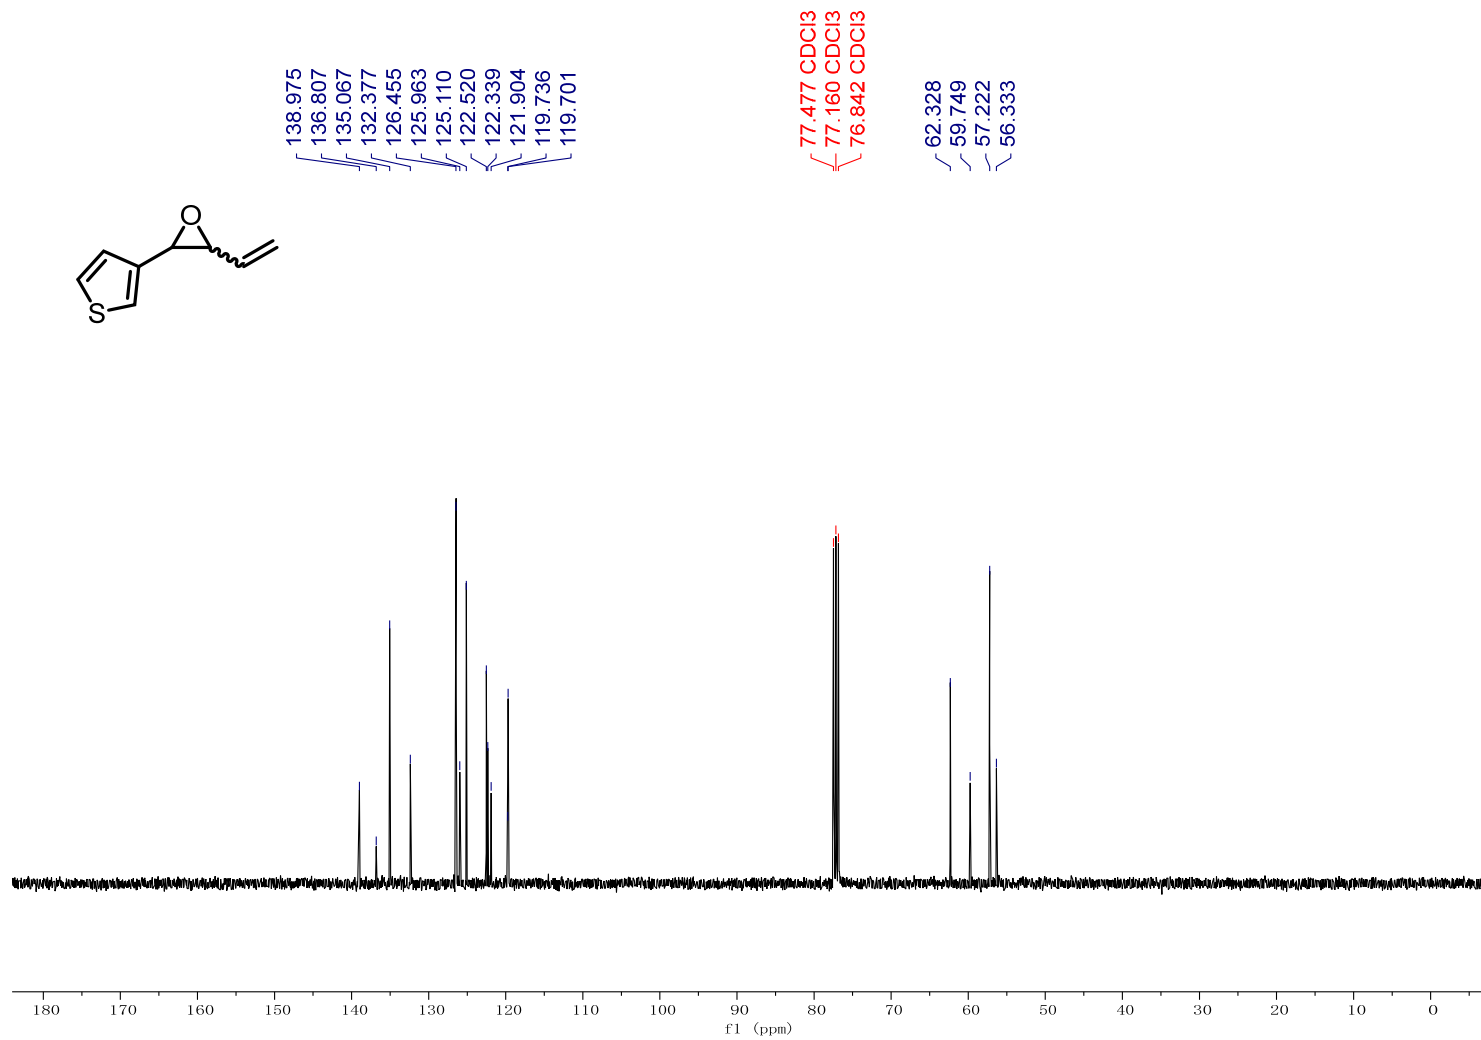

<sup>1</sup>H NMR (400 MHz, CDCl<sub>3</sub>) Spectrum of 3-tosyl-4-vinyloxazolidin-2-one **3a**

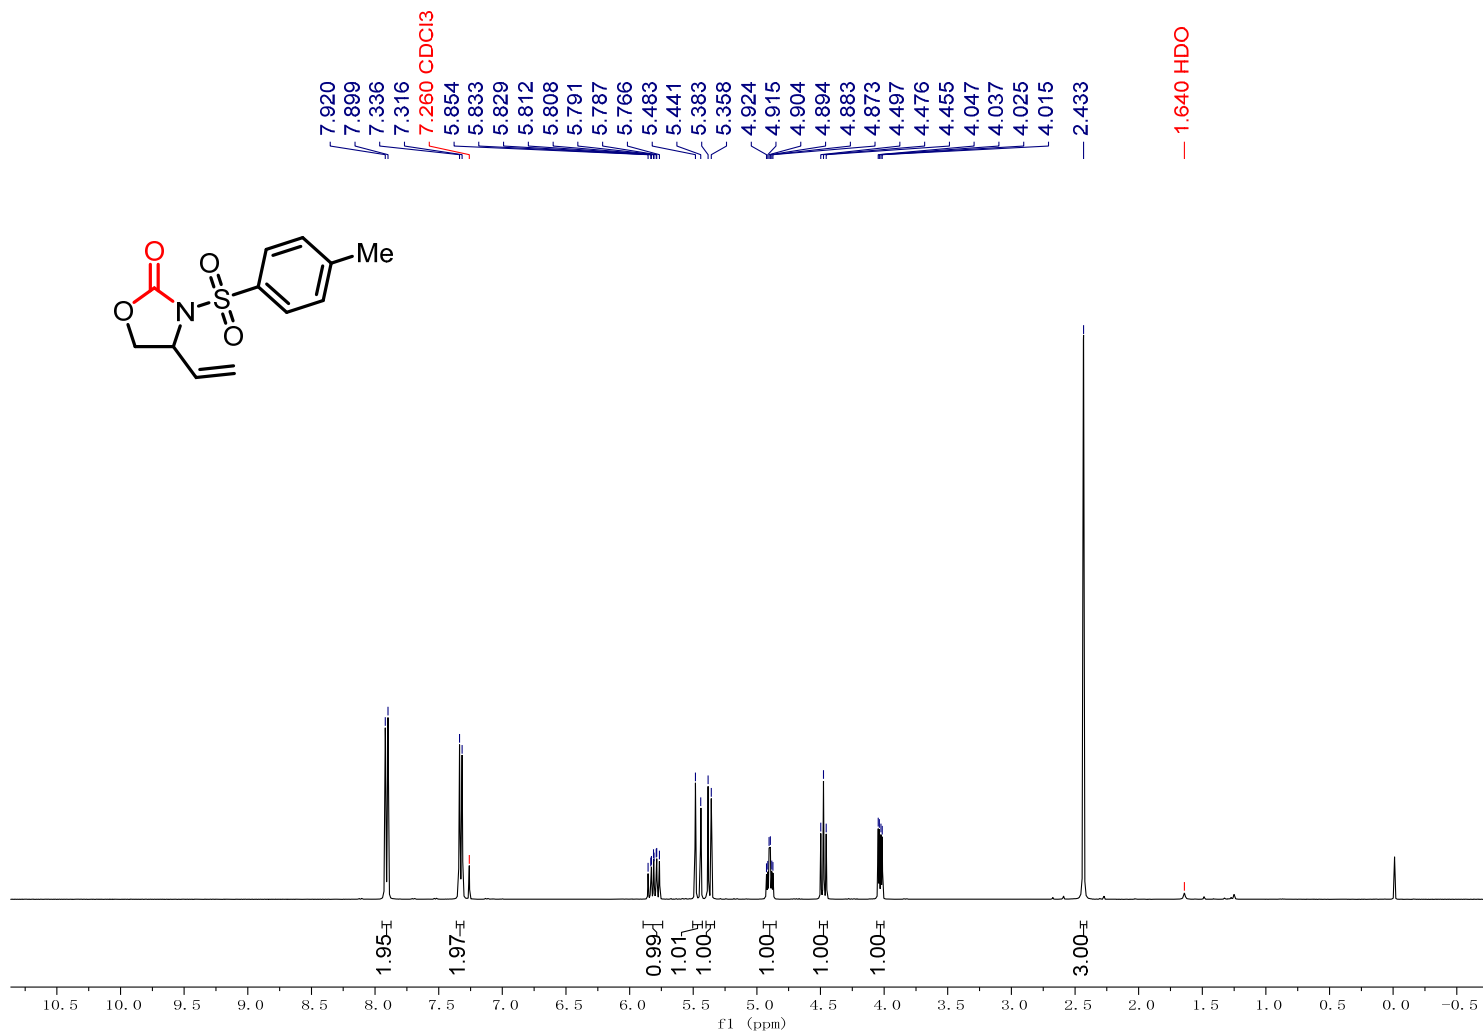

<sup>13</sup>C NMR (100 MHz, CDCl<sub>3</sub>) Spectrum of 3-tosyl-4-vinyloxazolidin-2-one 3a

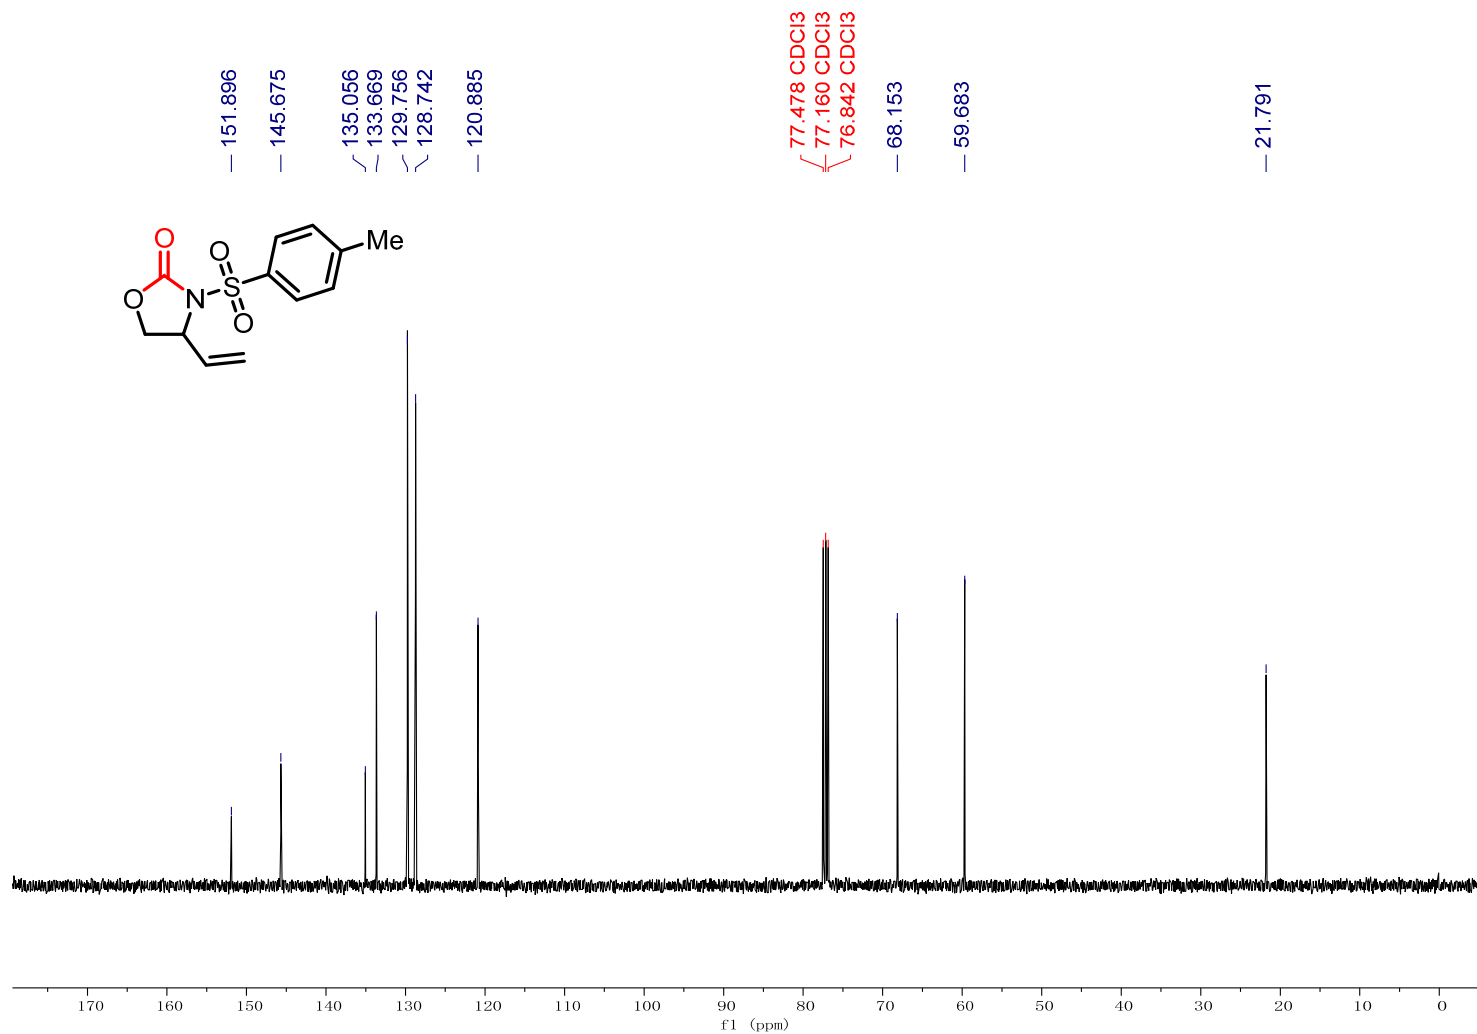

**<sup>1</sup>H NMR (400 MHz, CDCl<sub>3</sub>) Spectrum of 3-(phenylsulfonyl)-4-vinyloxazolidin-2-one 3b**

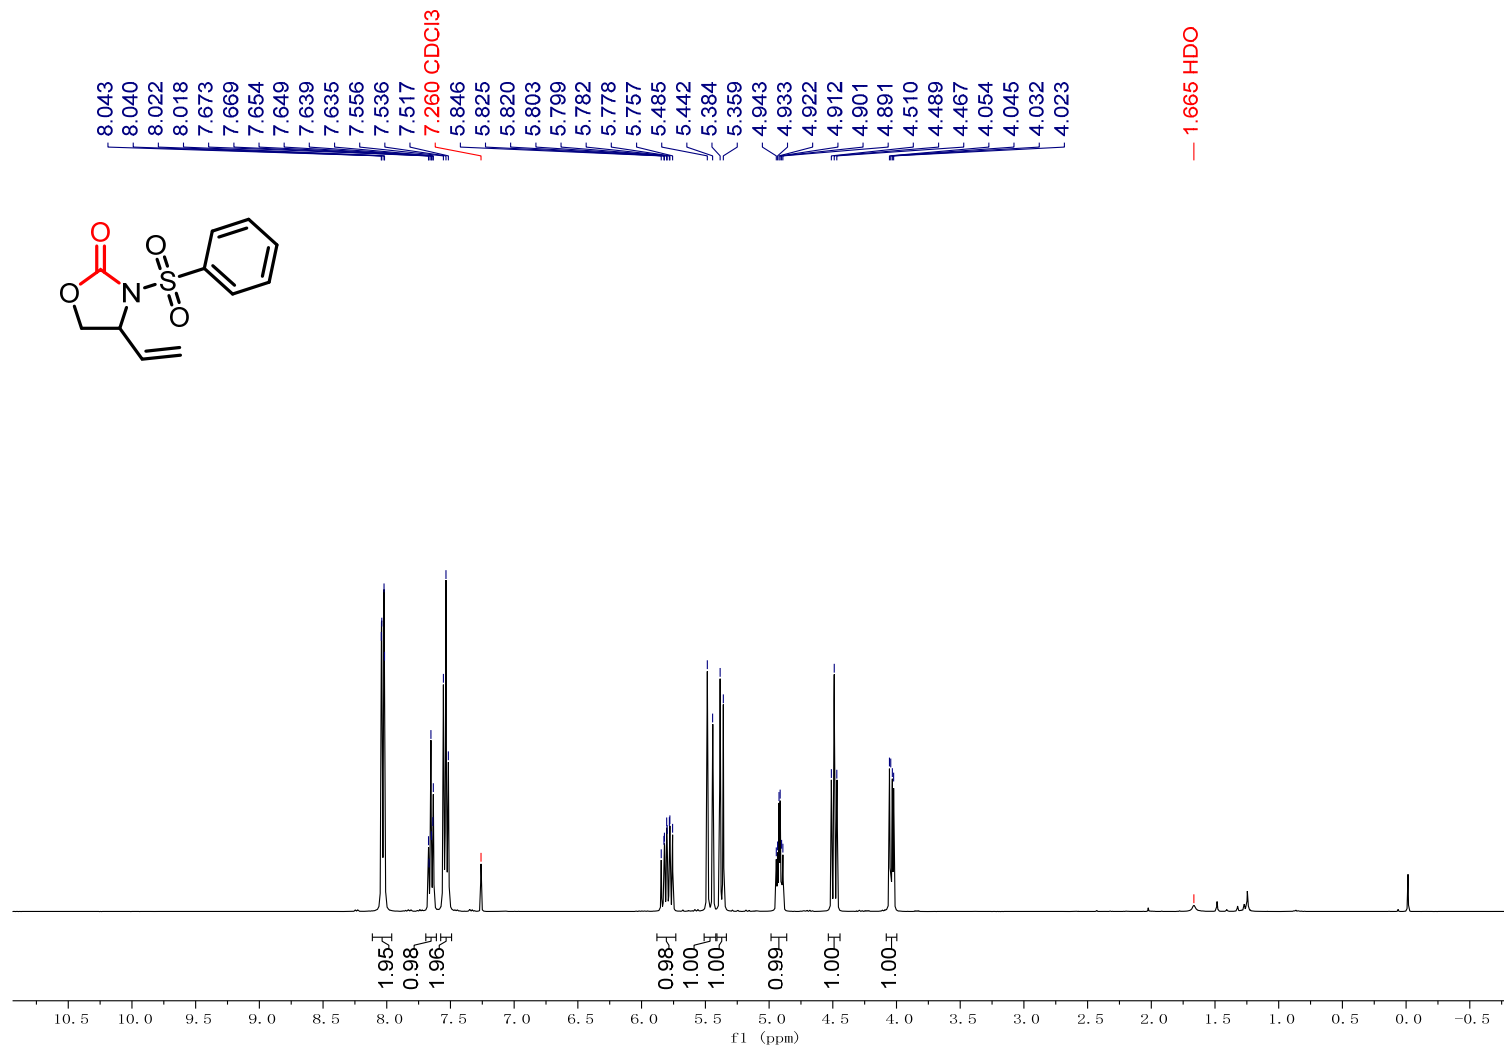

**<sup>1</sup>H NMR (400 MHz, CDCl<sub>3</sub>) Spectrum of 3-((4-methoxyphenyl)sulfonyl)-4-vinylazolidin-2-one 3c**

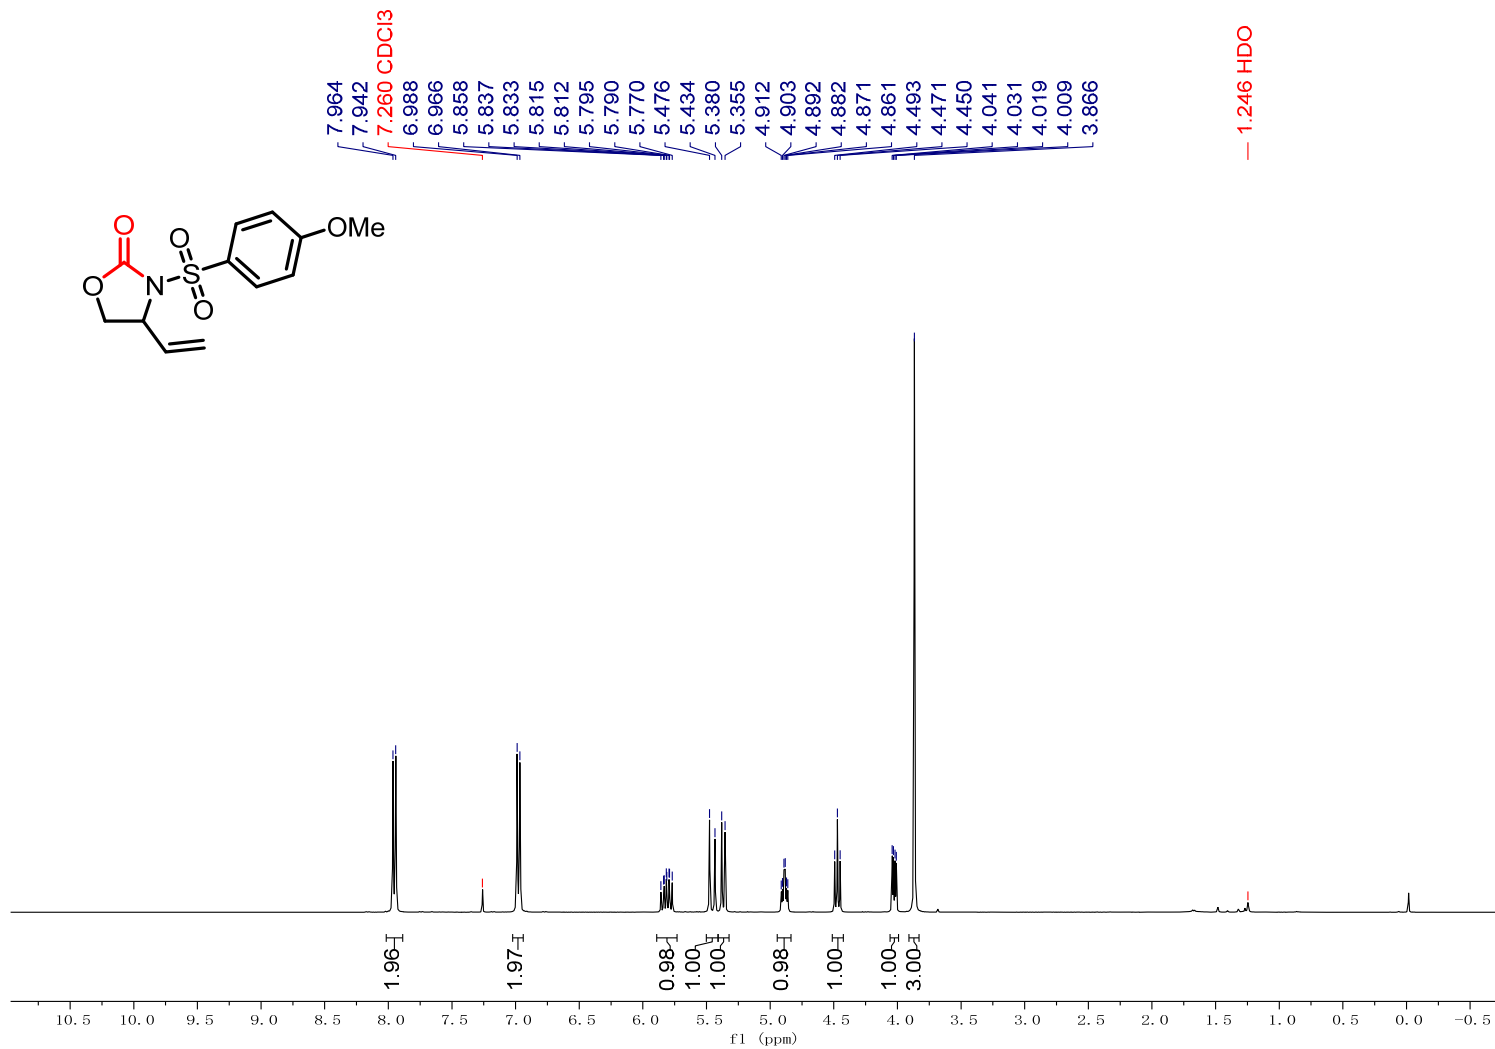

**<sup>13</sup>C NMR (100 MHz, CDCl<sub>3</sub>) Spectrum of 3-((4-methoxyphenyl)sulfonyl)-4-vinylloxazolidin-2-one 3c**

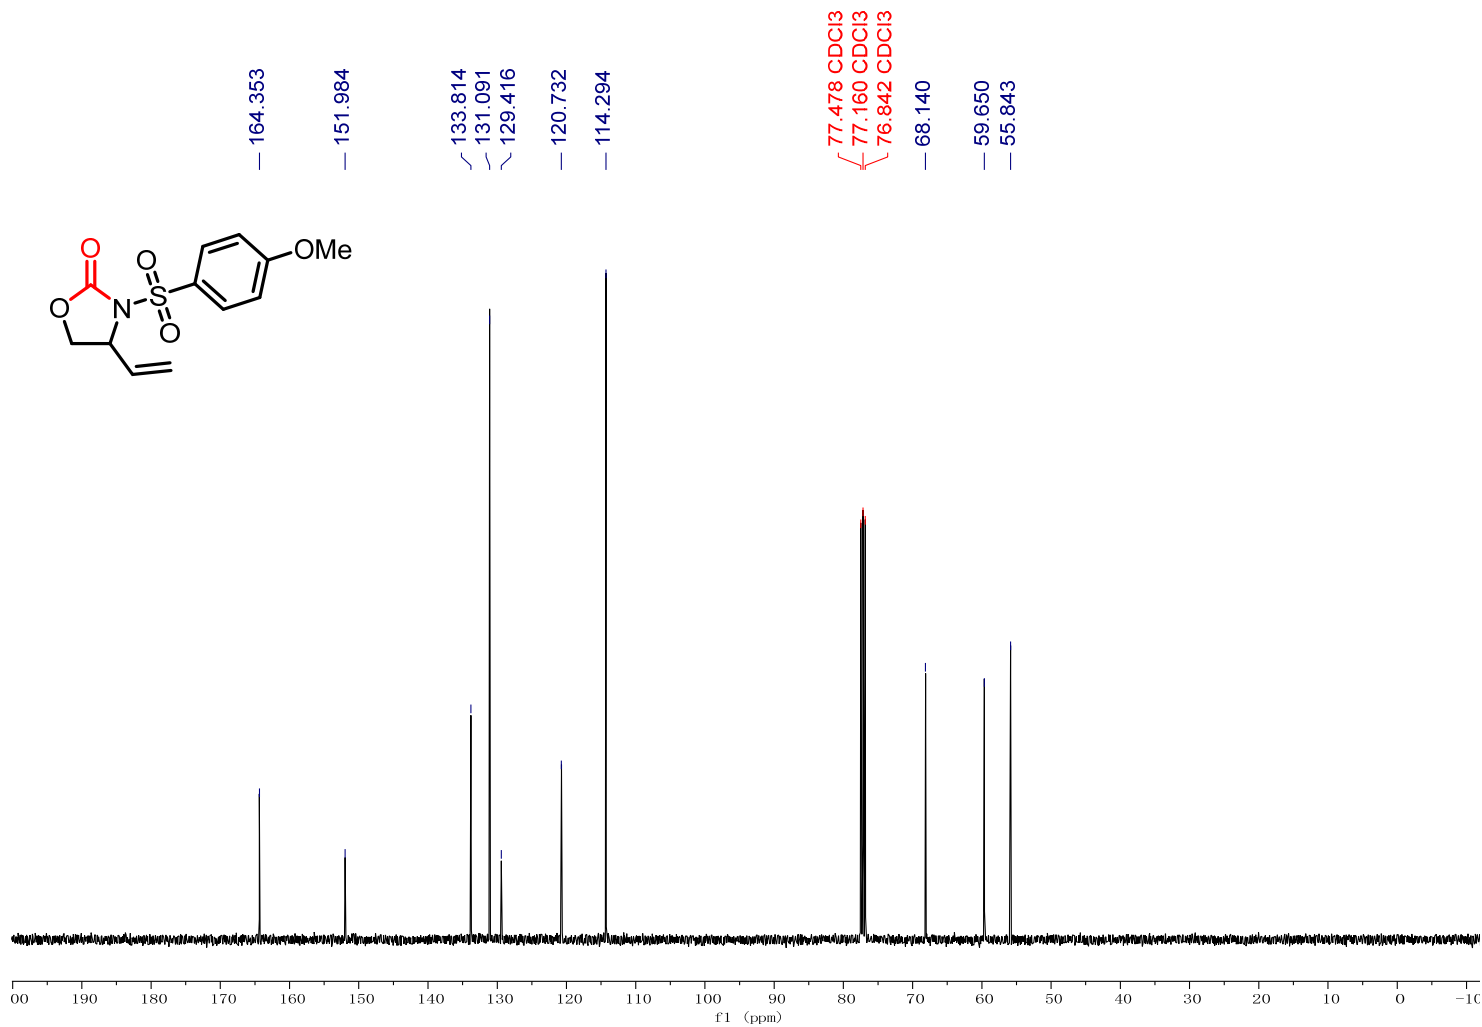



<sup>1</sup>H NMR (400 MHz, CDCl<sub>3</sub>) Spectrum of 3-((4-fluorophenyl)sulfonyl)-4-vinylloxazolidin-2-one 3d

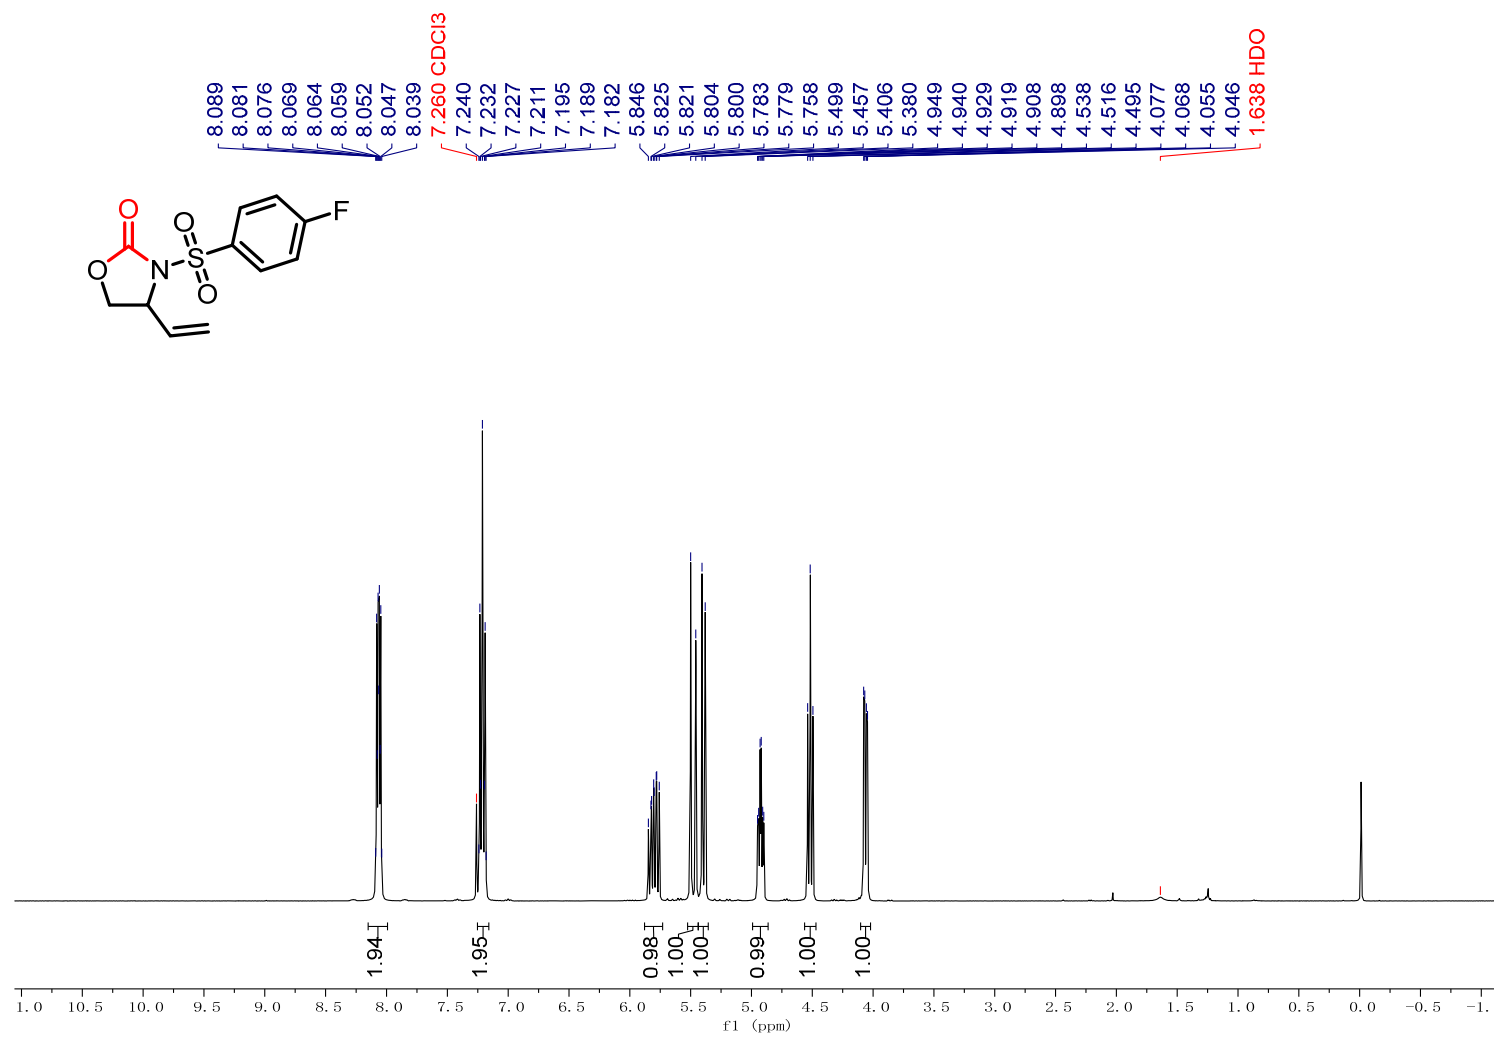

**<sup>1</sup>H NMR (400 MHz, CDCl<sub>3</sub>) Spectrum of 3-((4-chlorophenyl)sulfonyl)-4-vinyloxazolidin-2-one 3e**

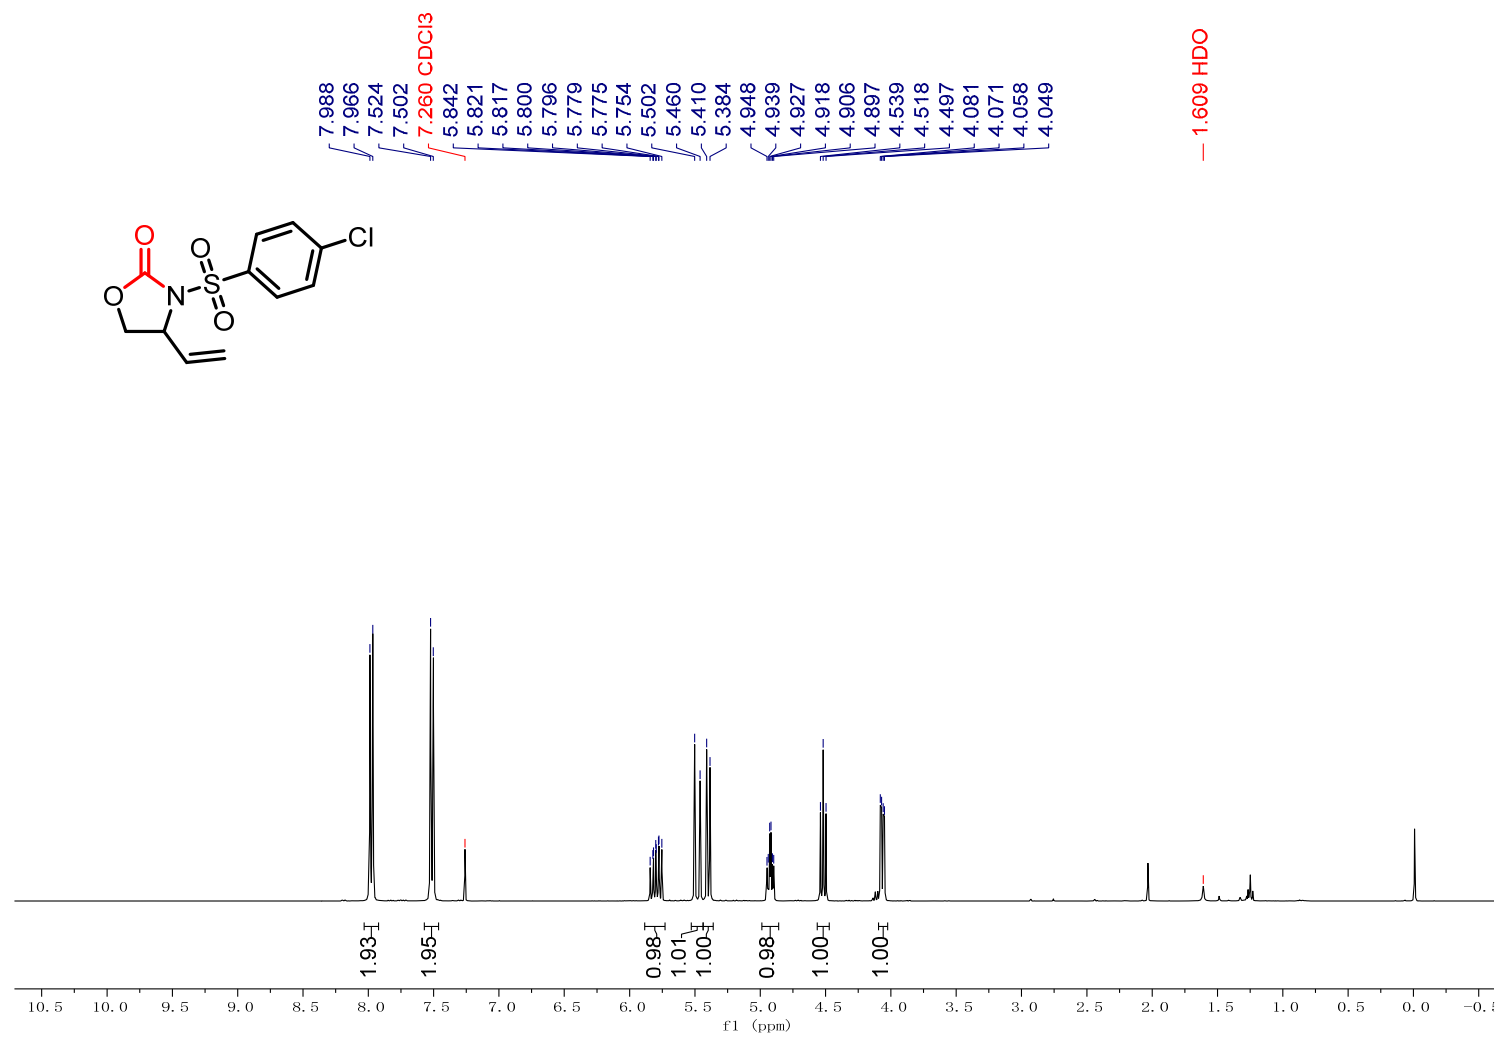

<sup>1</sup>H NMR (400 MHz, CDCl<sub>3</sub>) Spectrum of 3-((4-bromophenyl)sulfonyl)-4-vinyloxazolidin-2-one 3f

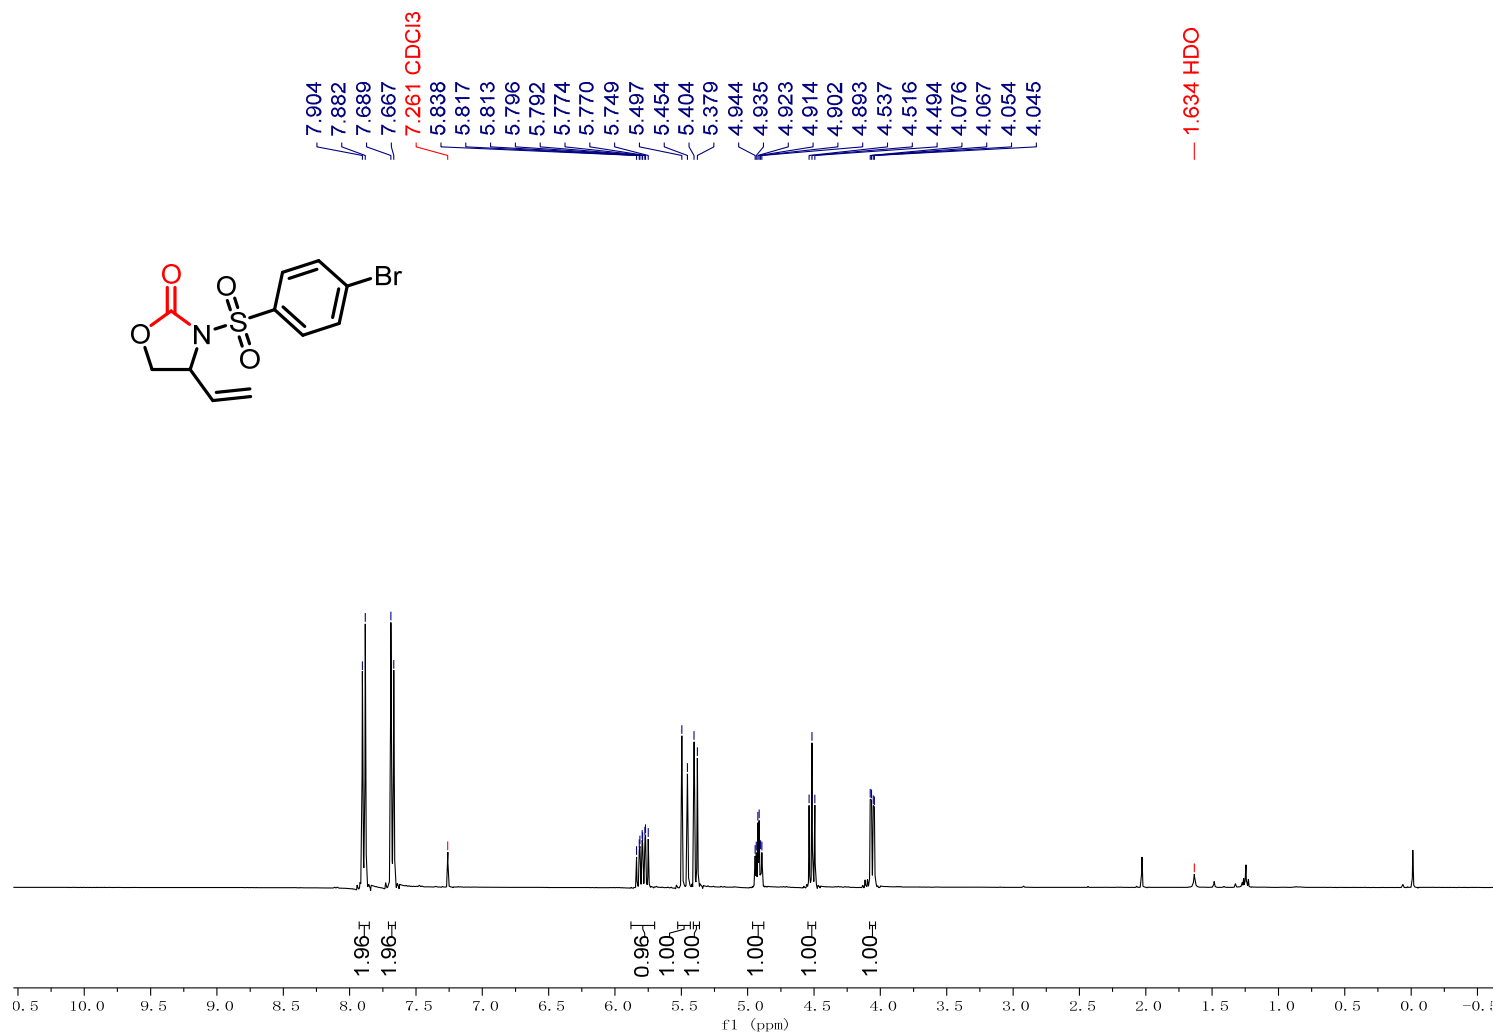

<sup>13</sup>C NMR (100 MHz, CDCl<sub>3</sub>) Spectrum of 3-((4-bromophenyl)sulfonyl)-4-vinylloxazolidin-2-one 3f

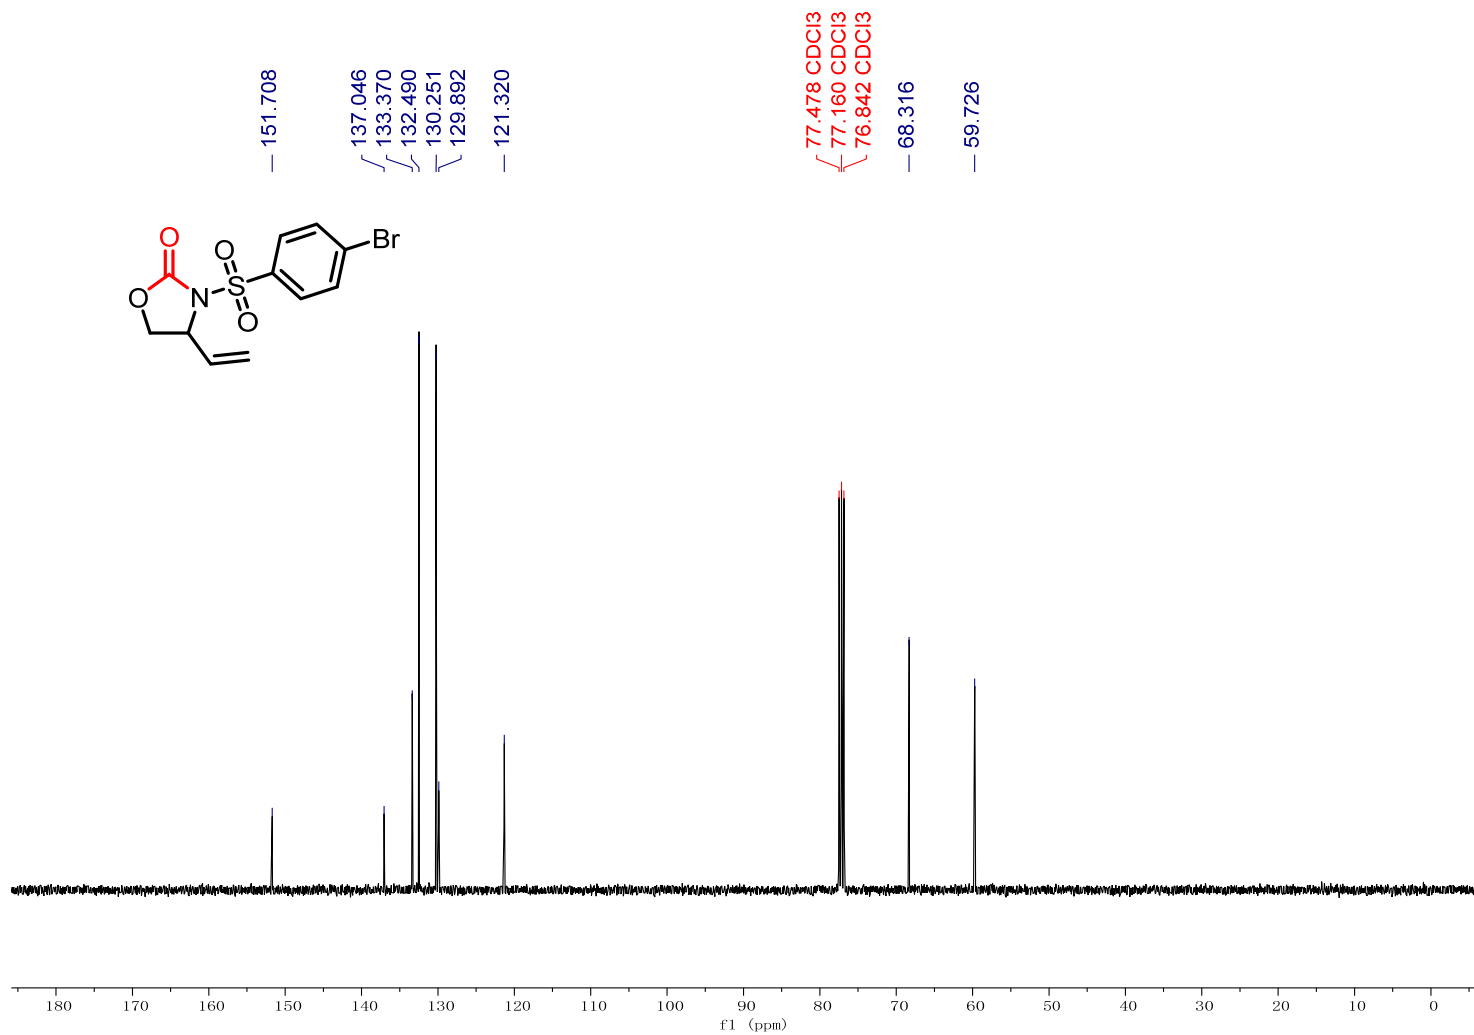

**<sup>1</sup>H NMR (400 MHz, CDCl<sub>3</sub>) Spectrum of 3-((4-(trifluoromethyl)phenyl)sulfonyl)-4-vinylloxazolidin-2-one 3g**

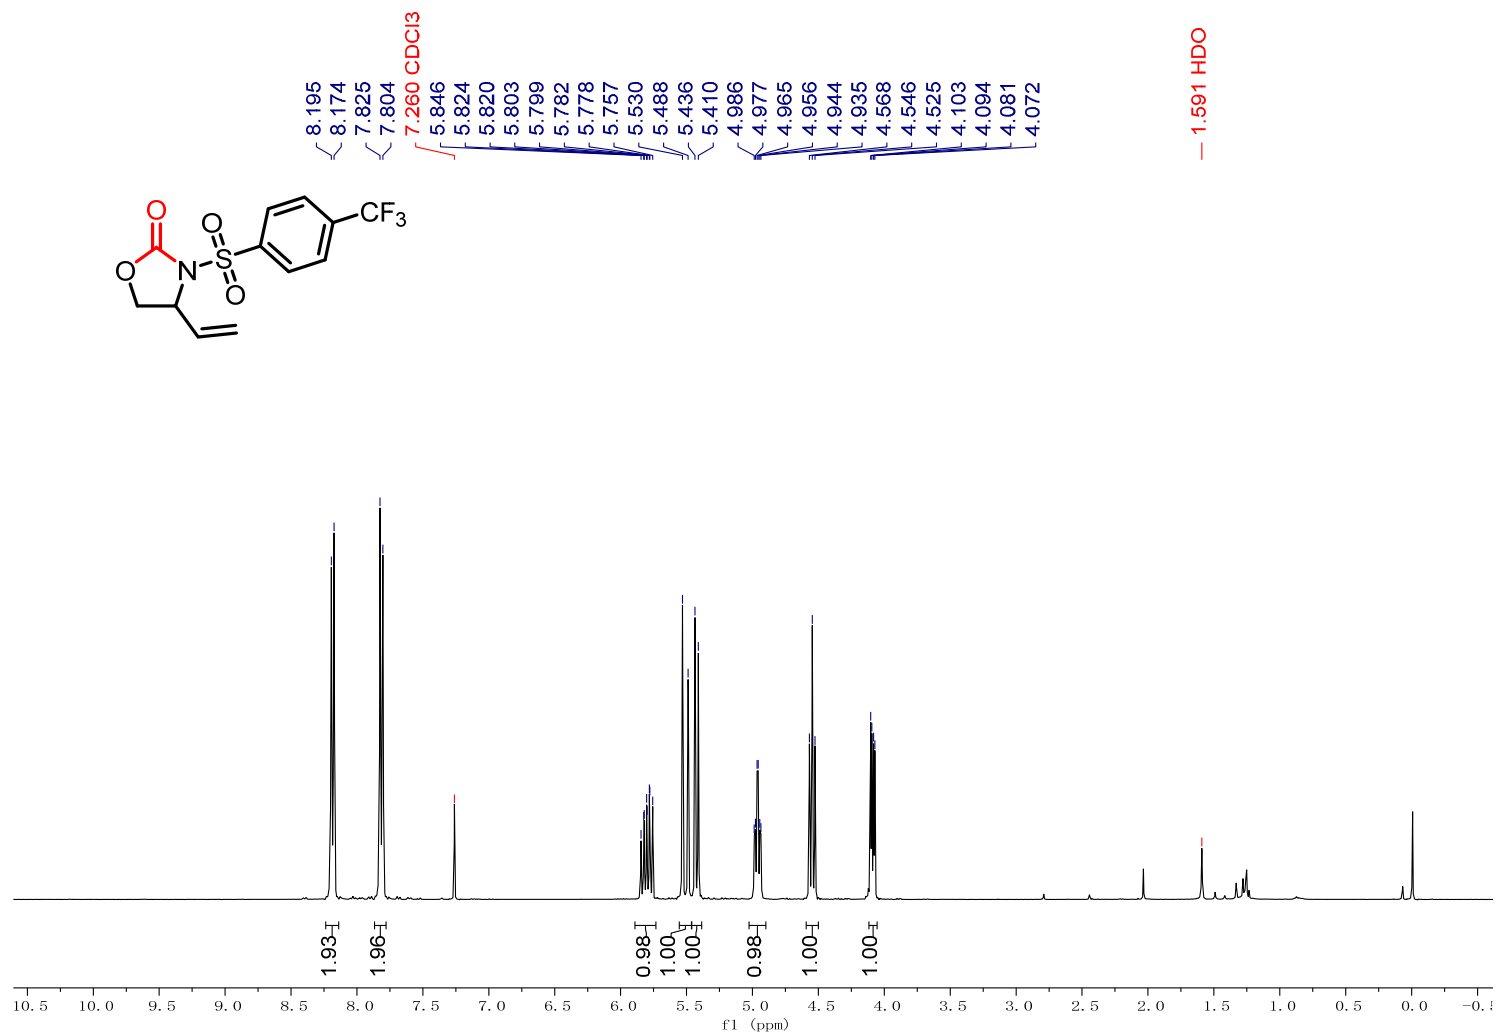

**<sup>13</sup>C NMR (100 MHz, CDCl<sub>3</sub>) Spectrum of 3-((4-(trifluoromethyl)phenyl)sulfonyl)-4-vinylloxazolidin-2-one 3g**

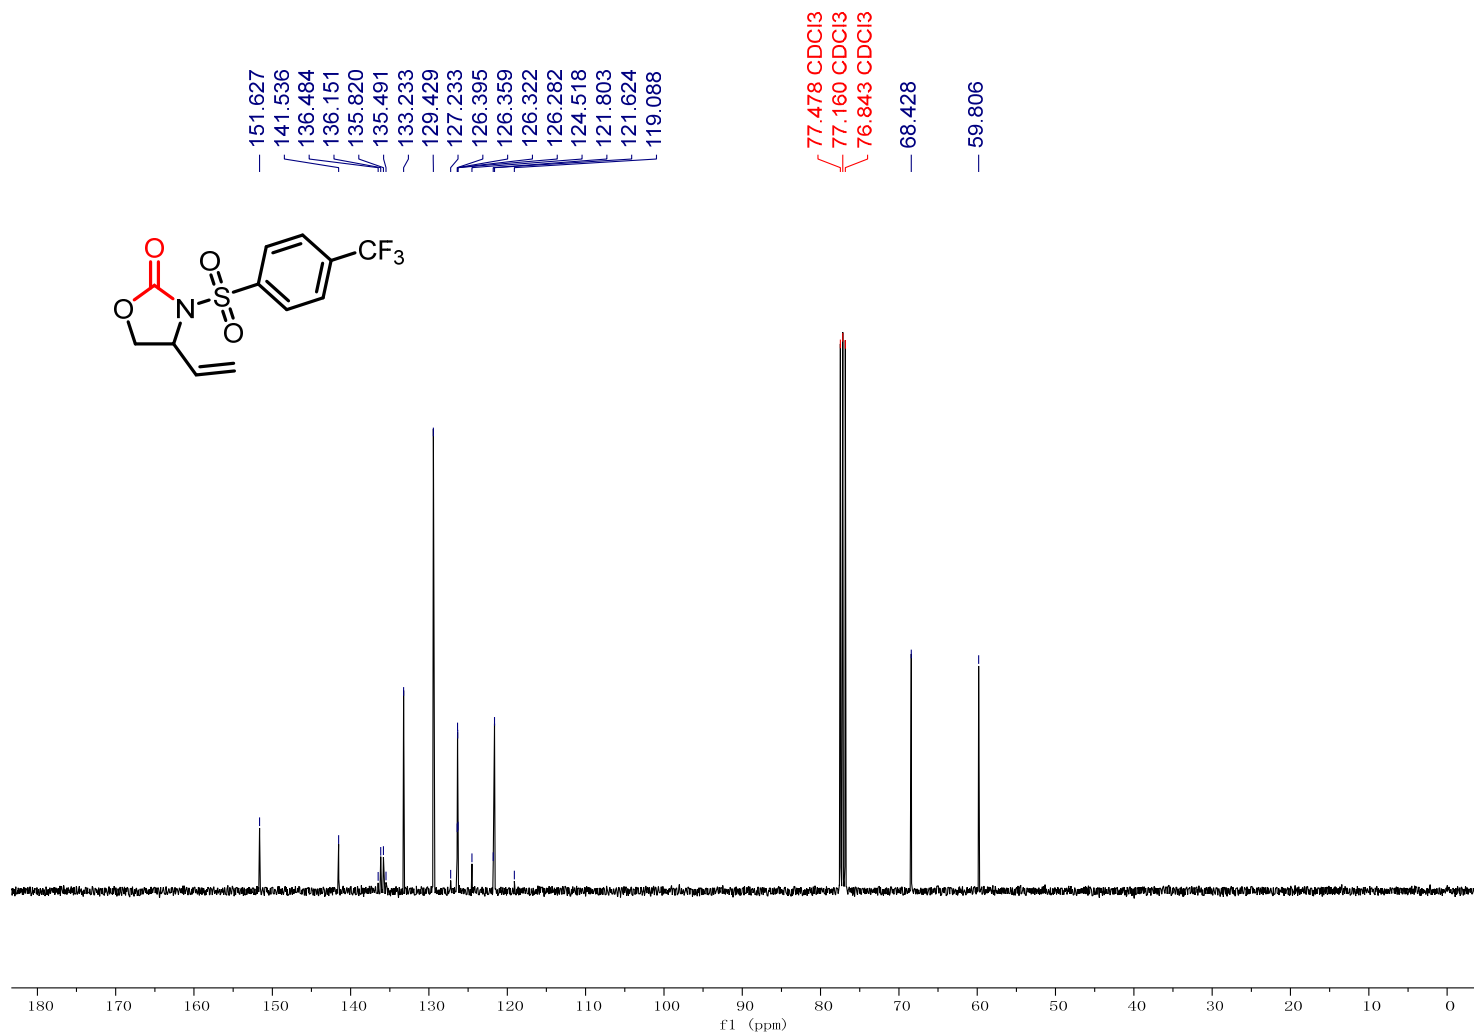

**<sup>1</sup>H NMR (400 MHz, CDCl<sub>3</sub>) Spectrum of 3-(naphthalen-1-ylsulfonyl)-4-vinyloxazolidin-2-one 3h**

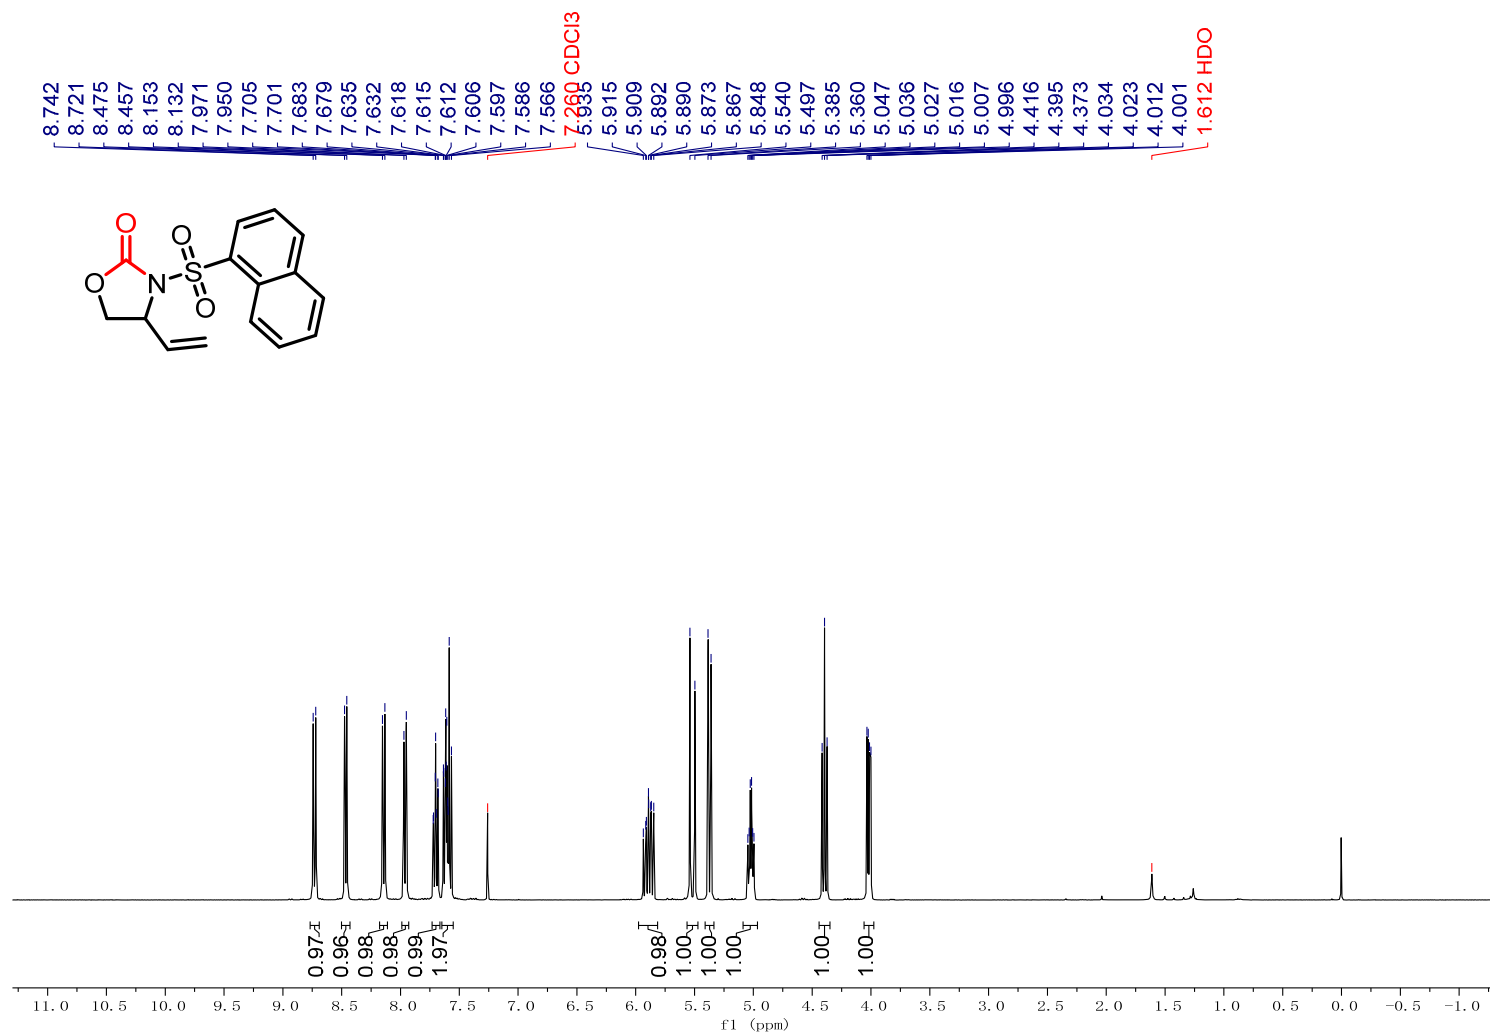

<sup>13</sup>C NMR (100 MHz, CDCl<sub>3</sub>) Spectrum of 3-(naphthalen-1-ylsulfonyl)-4-vinylloxazolidin-2-one 3h

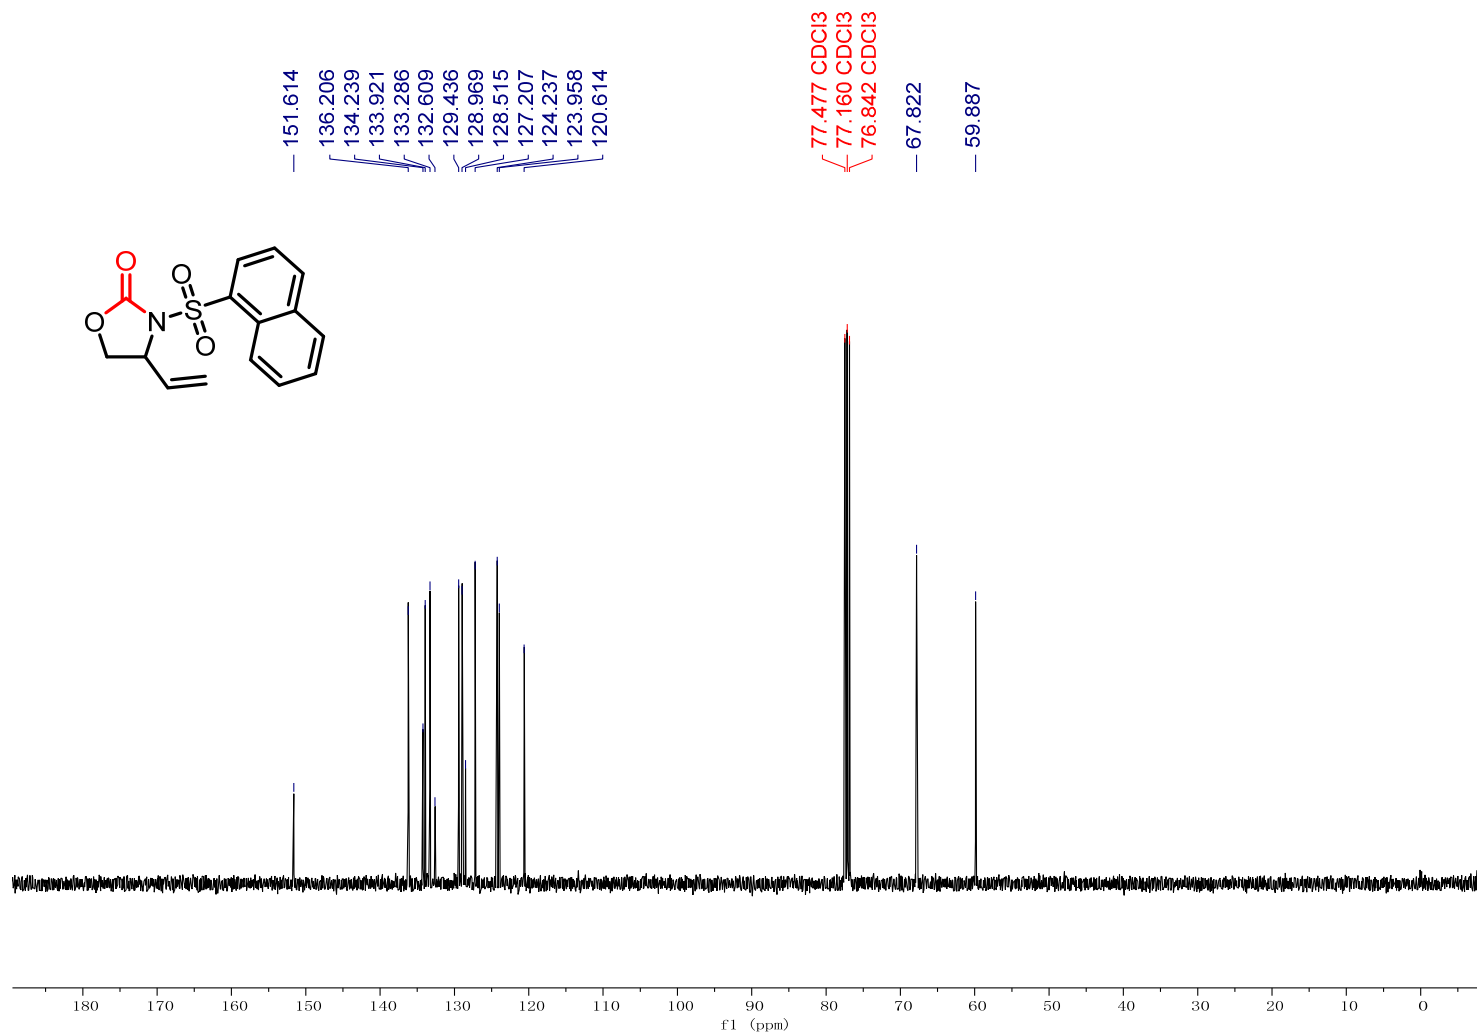



**<sup>1</sup>H NMR (400 MHz, CDCl<sub>3</sub>) Spectrum of 3-(naphthalen-2-ylsulfonyl)-4-vinyloxazolidin-2-one 3i**

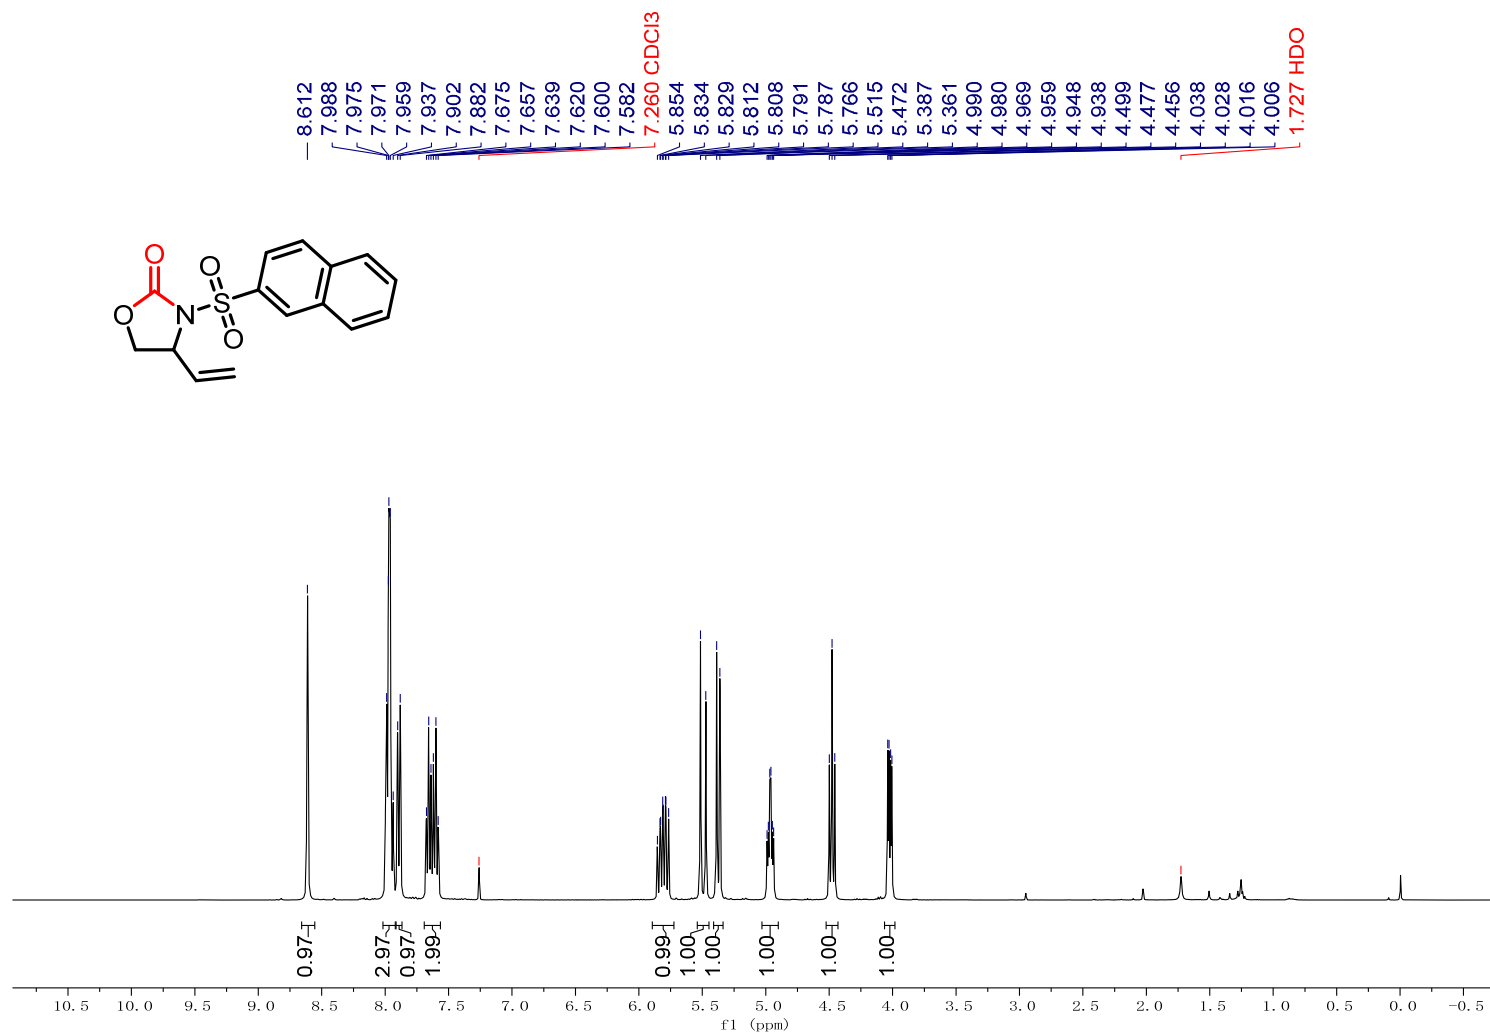

**<sup>13</sup>C NMR (100 MHz, CDCl<sub>3</sub>) Spectrum of 3-(naphthalen-2-ylsulfonyl)-4-vinylloxazolidin-2-one 3i**

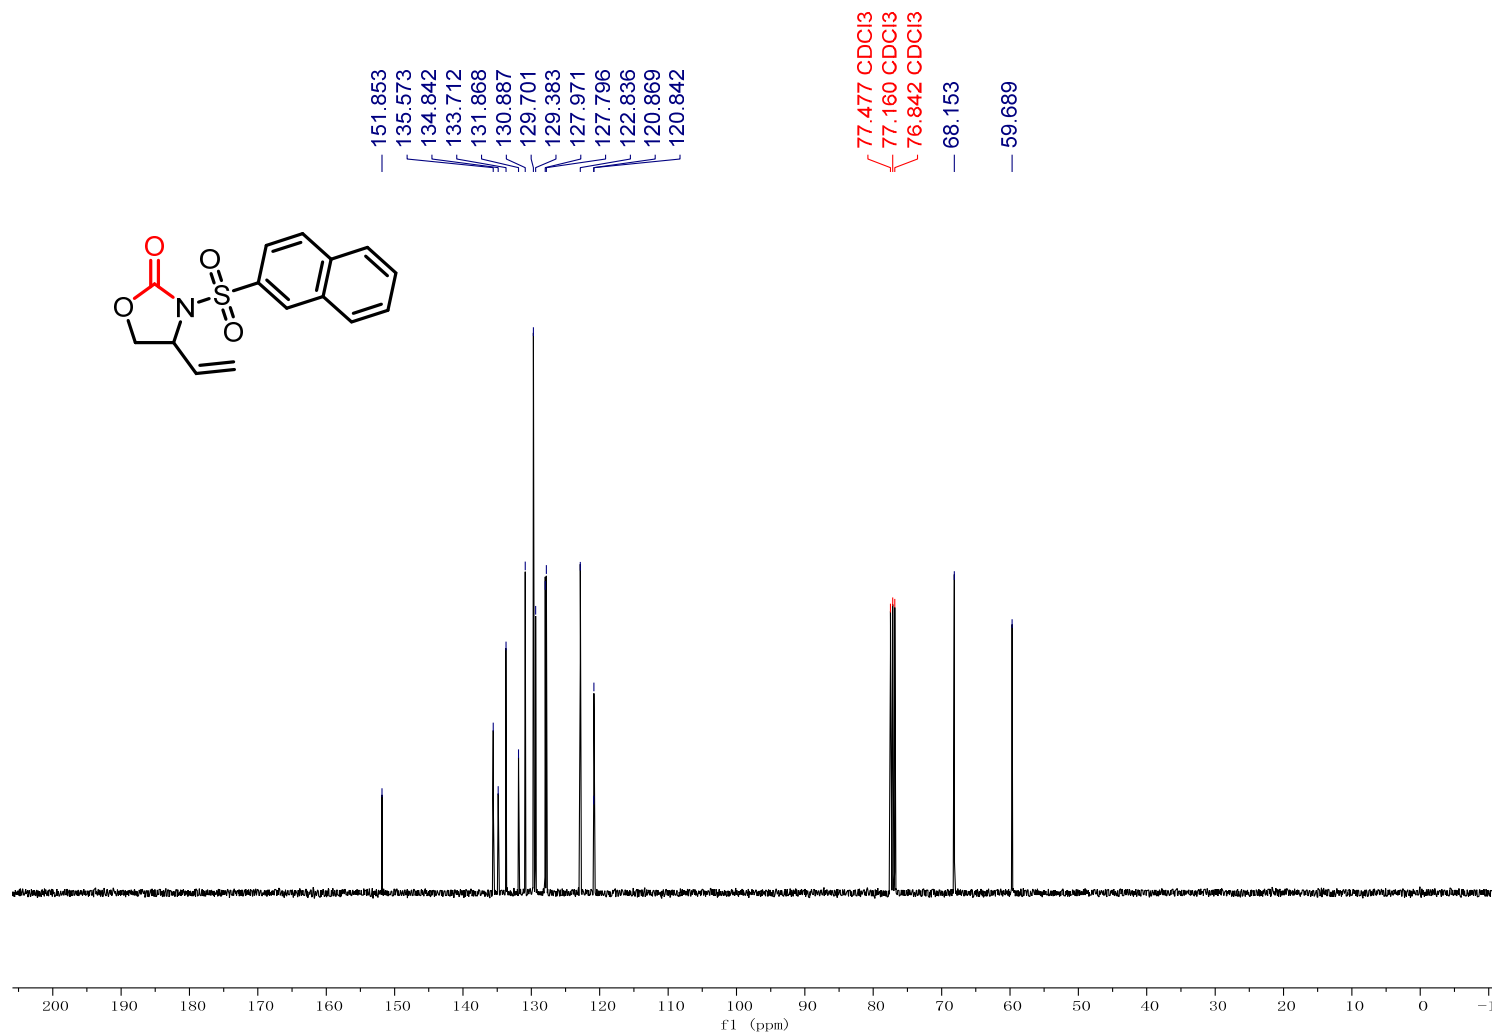

**<sup>1</sup>H NMR (400 MHz, CDCl<sub>3</sub>) Spectrum of 3-(thiophen-2-ylsulfonyl)-4-vinyloxazolidin-2-one 3j**

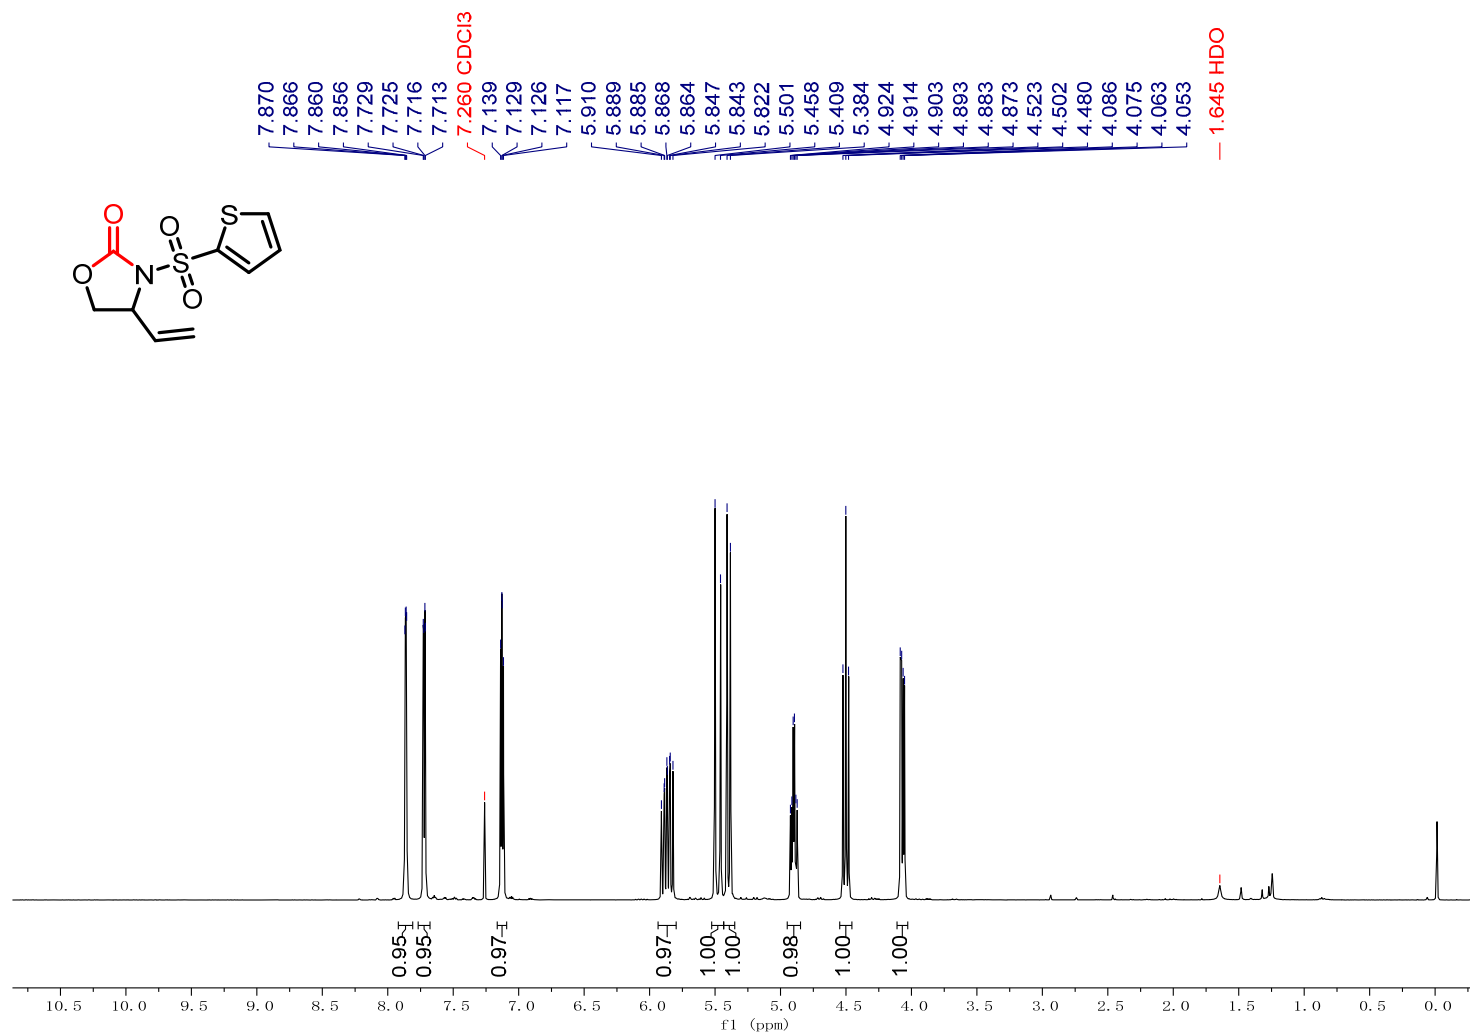

<sup>13</sup>C NMR (100 MHz, CDCl<sub>3</sub>) Spectrum of 3-(thiophen-2-ylsulfonyl)-4-vinylloxazolidin-2-one 3j

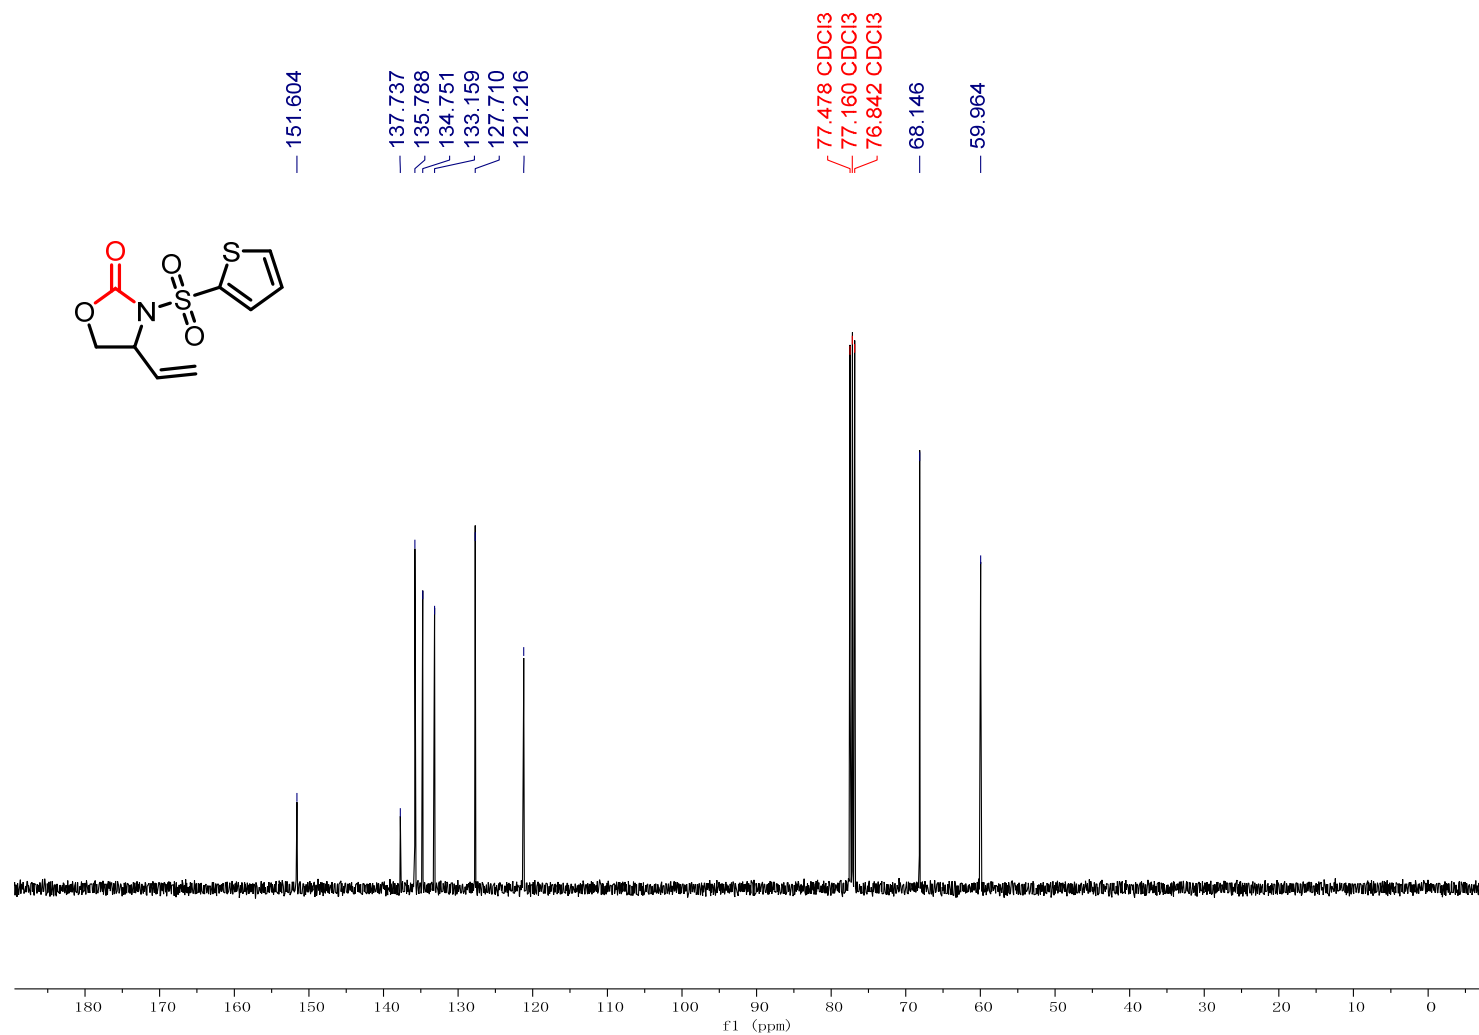

<sup>1</sup>H NMR (400 MHz, CDCl<sub>3</sub>) Spectrum of 3-(benzylsulfonyl)-4-vinylloxazolidin-2-one 3k

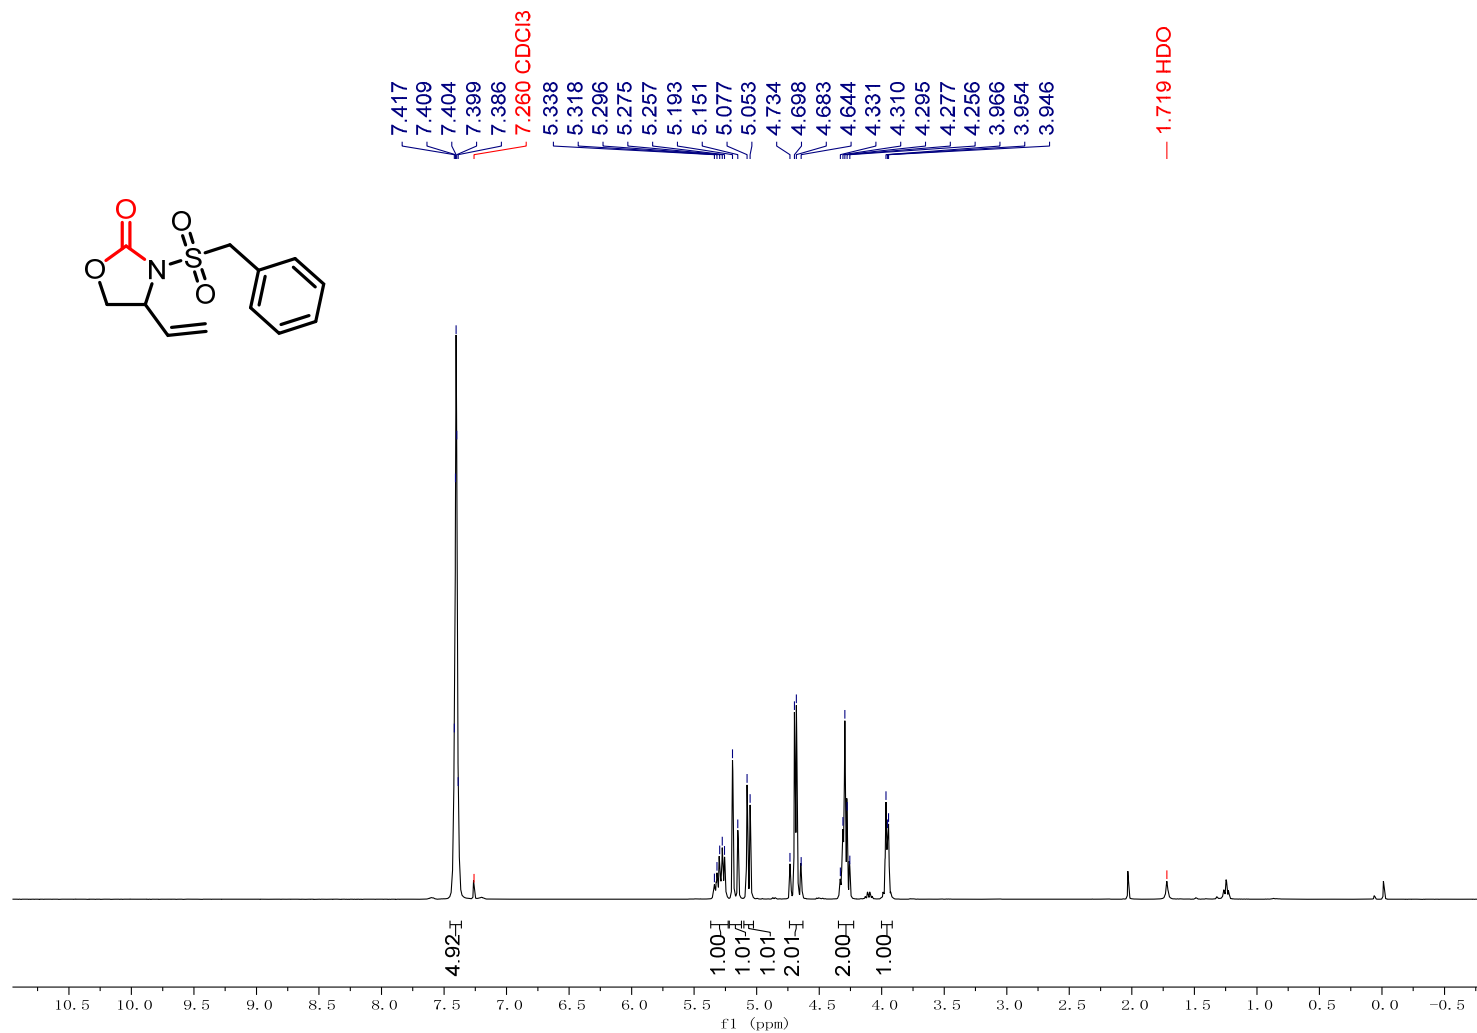

<sup>13</sup>C NMR (100 MHz, CDCl<sub>3</sub>) Spectrum of 3-(benzylsulfonyl)-4-vinylloxazolidin-2-one 3k

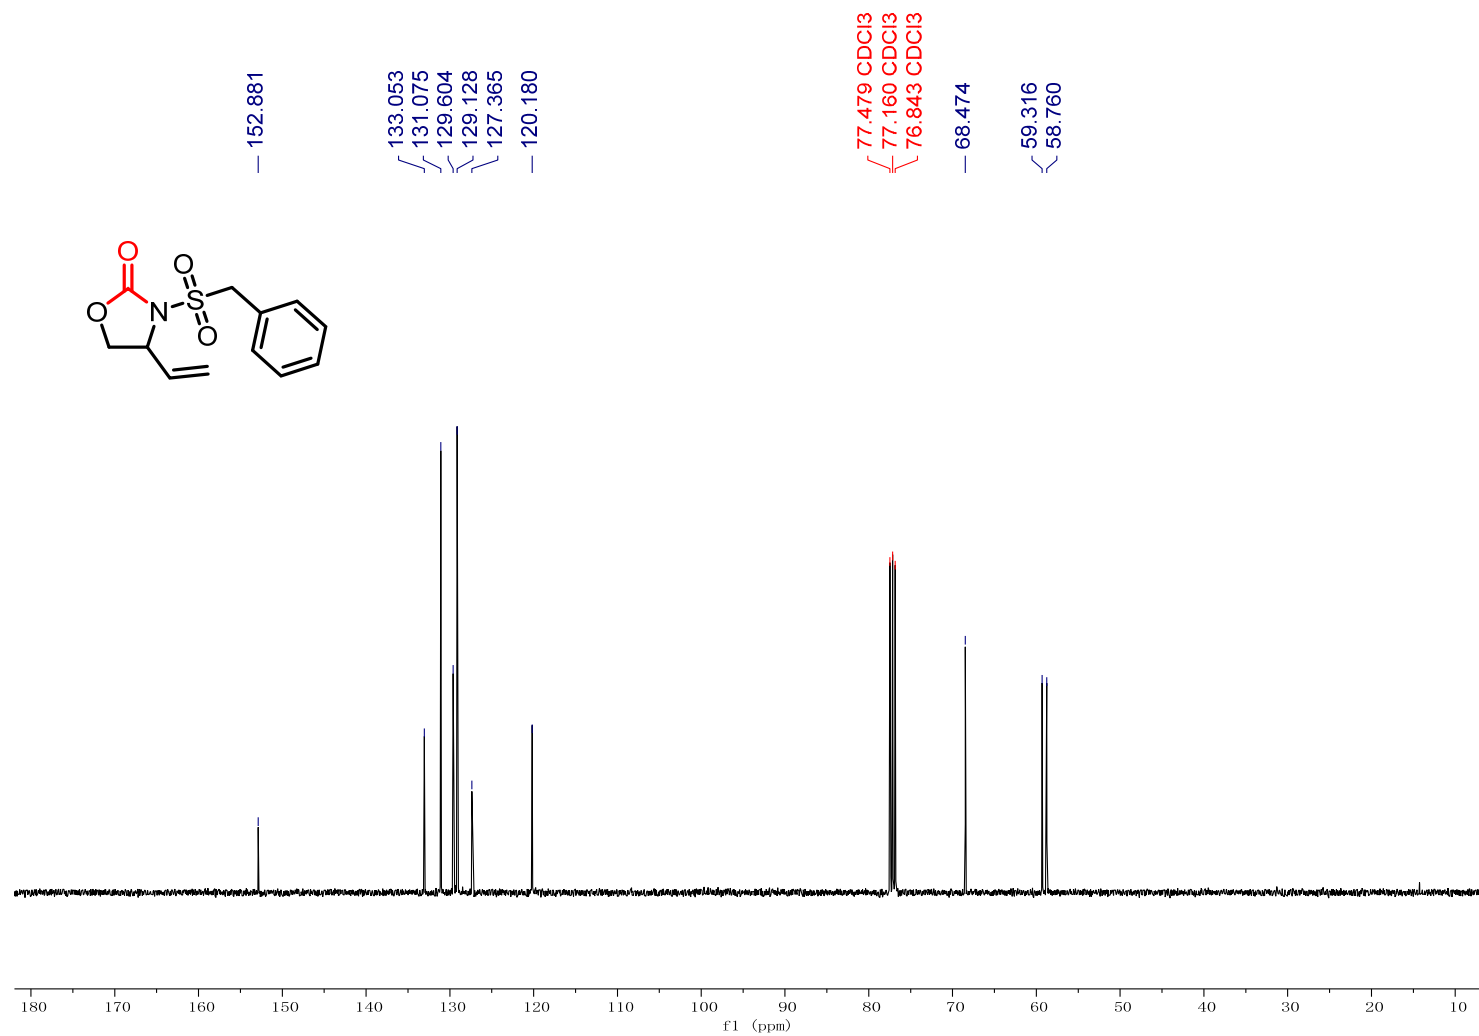

**<sup>1</sup>H NMR (400 MHz, CDCl<sub>3</sub>) Spectrum of 3-(butylsulfonyl)-4-vinylloxazolidin-2-one 3l**

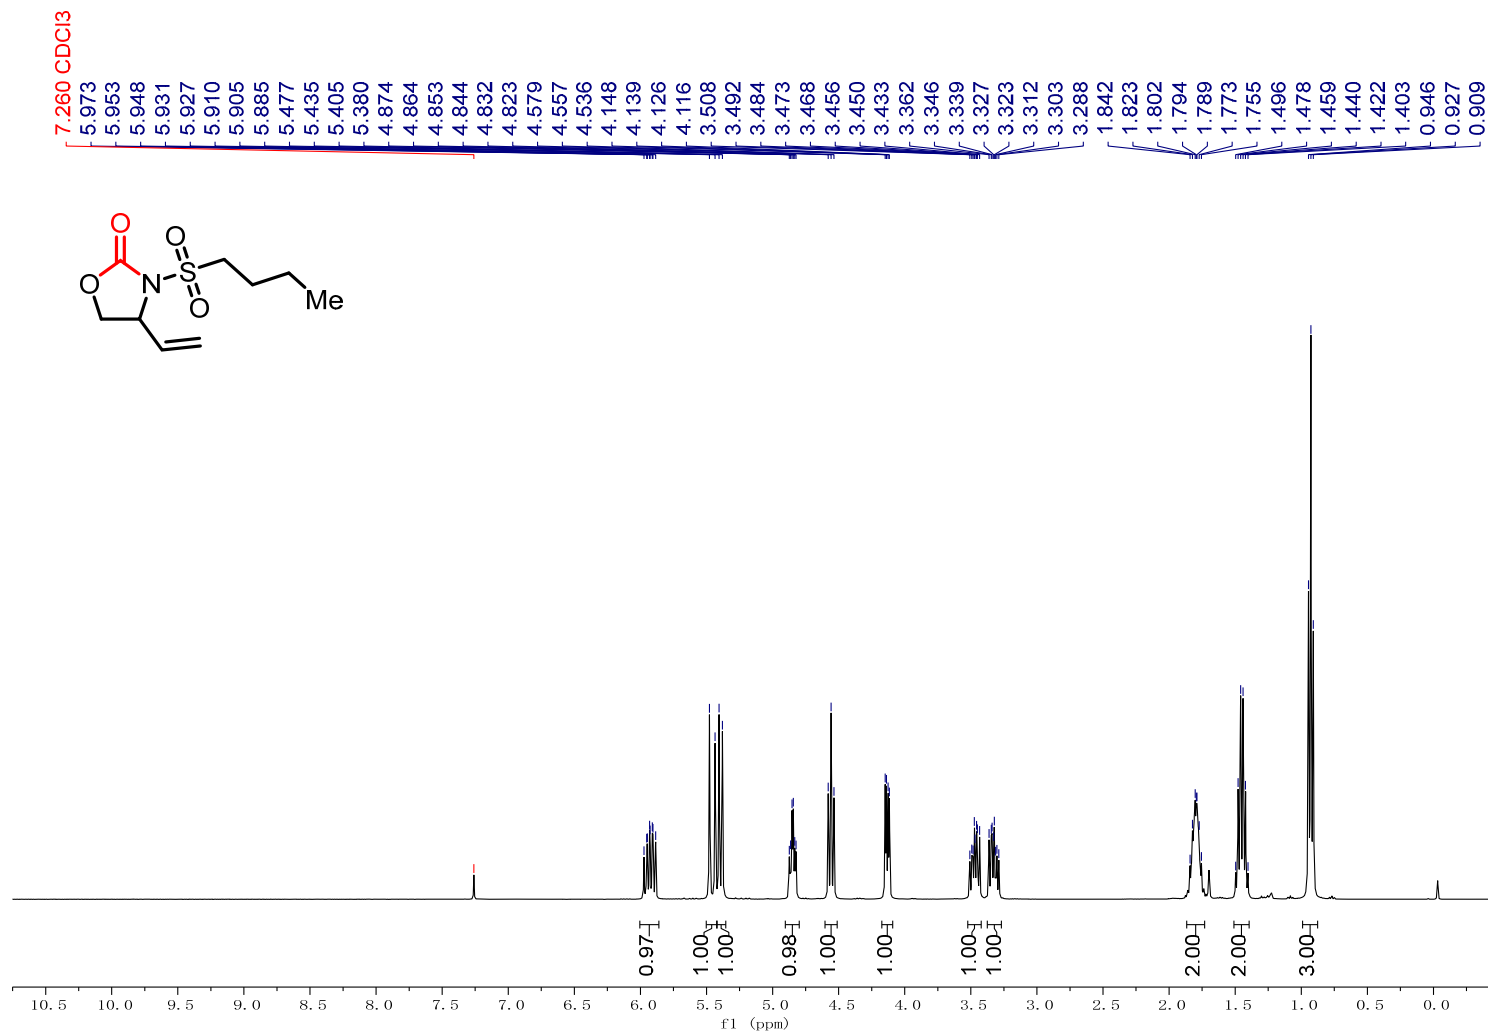

**<sup>13</sup>C NMR (100 MHz, CDCl<sub>3</sub>) Spectrum of 3-(butylsulfonyl)-4-vinylloxazolidin-2-one 3l**

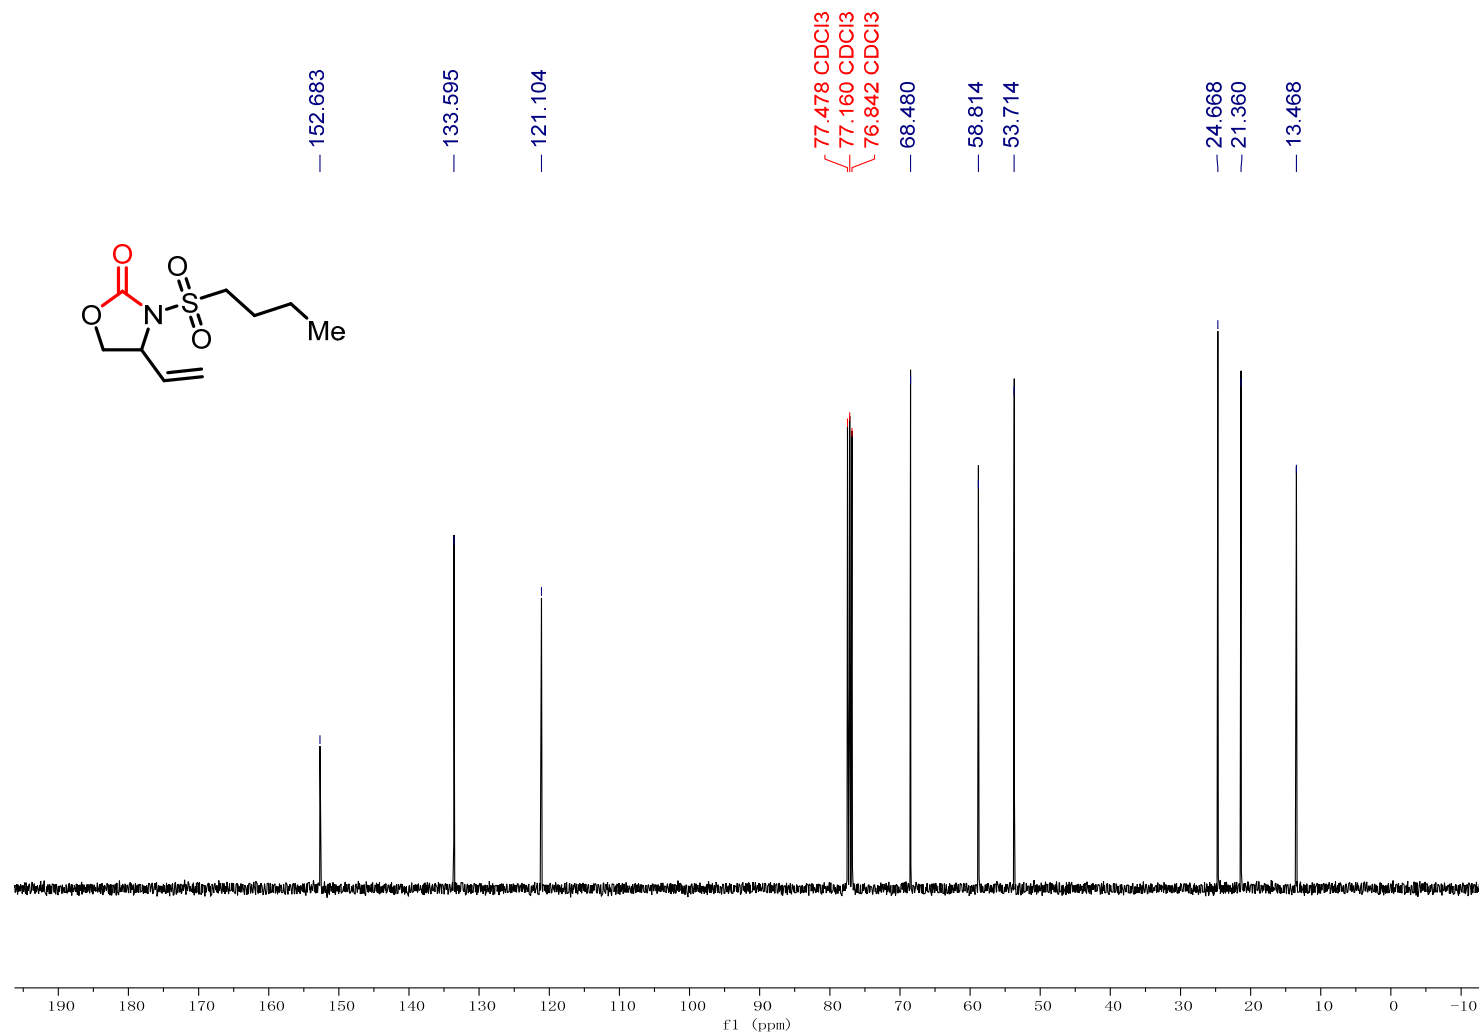



**<sup>1</sup>H NMR (400 MHz, CDCl<sub>3</sub>) Spectrum of 3-(propylsulfonyl)-4-vinylloxazolidin-2-one 3m**

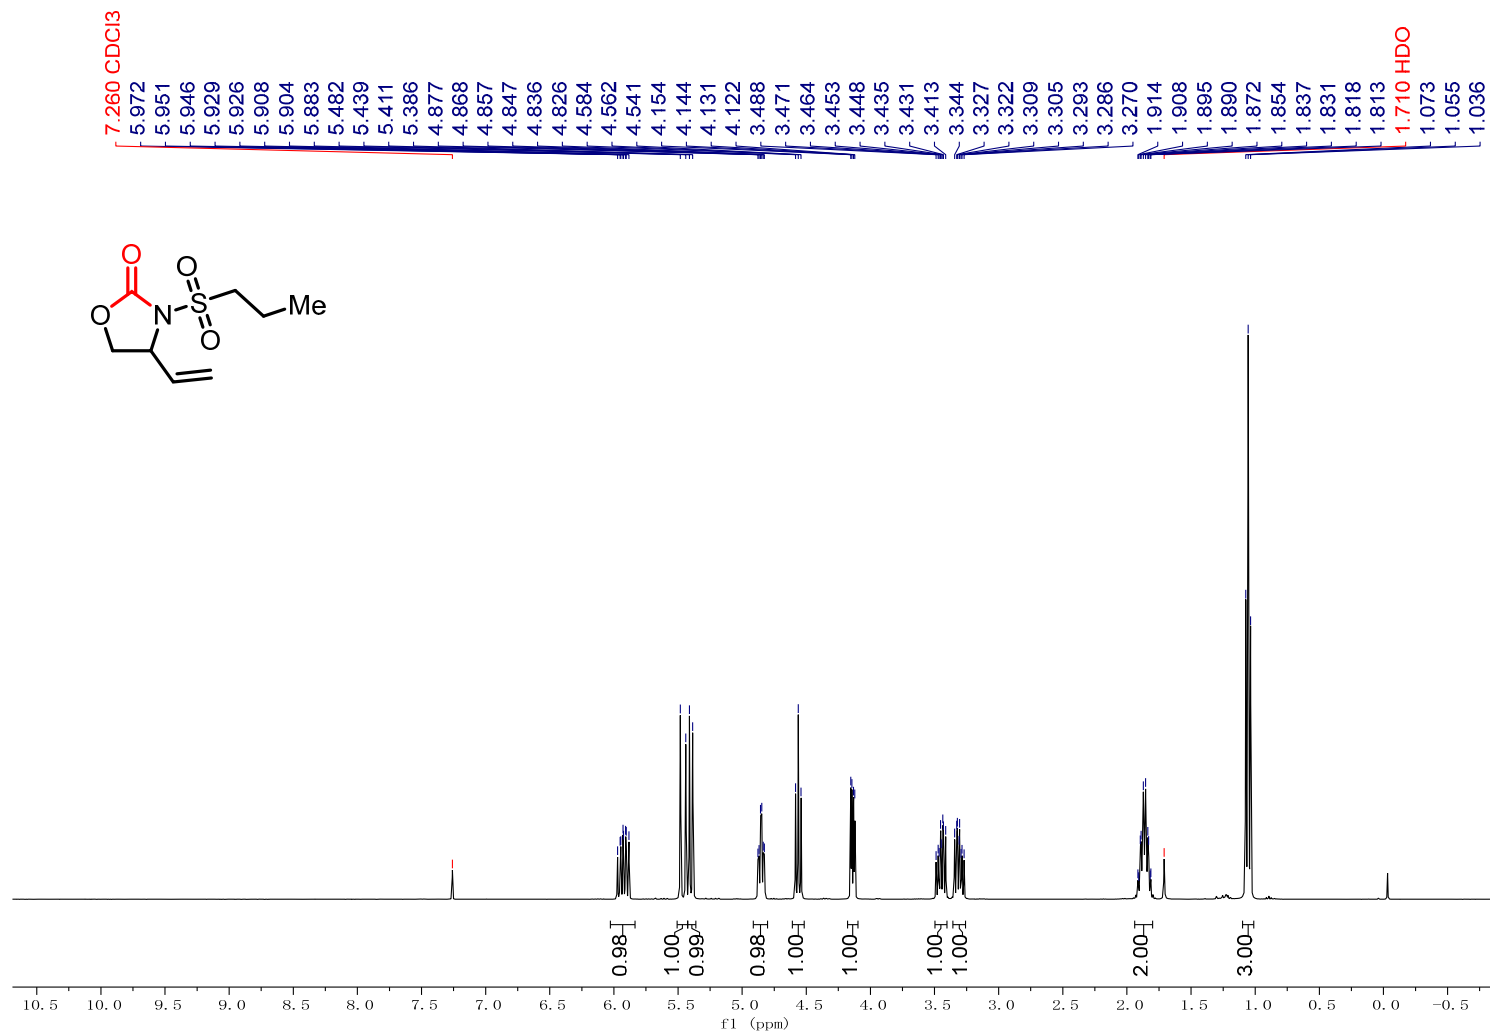

<sup>13</sup>C NMR (100 MHz, CDCl<sub>3</sub>) Spectrum of 3-(propylsulfonyl)-4-vinylloxazolidin-2-one 3m

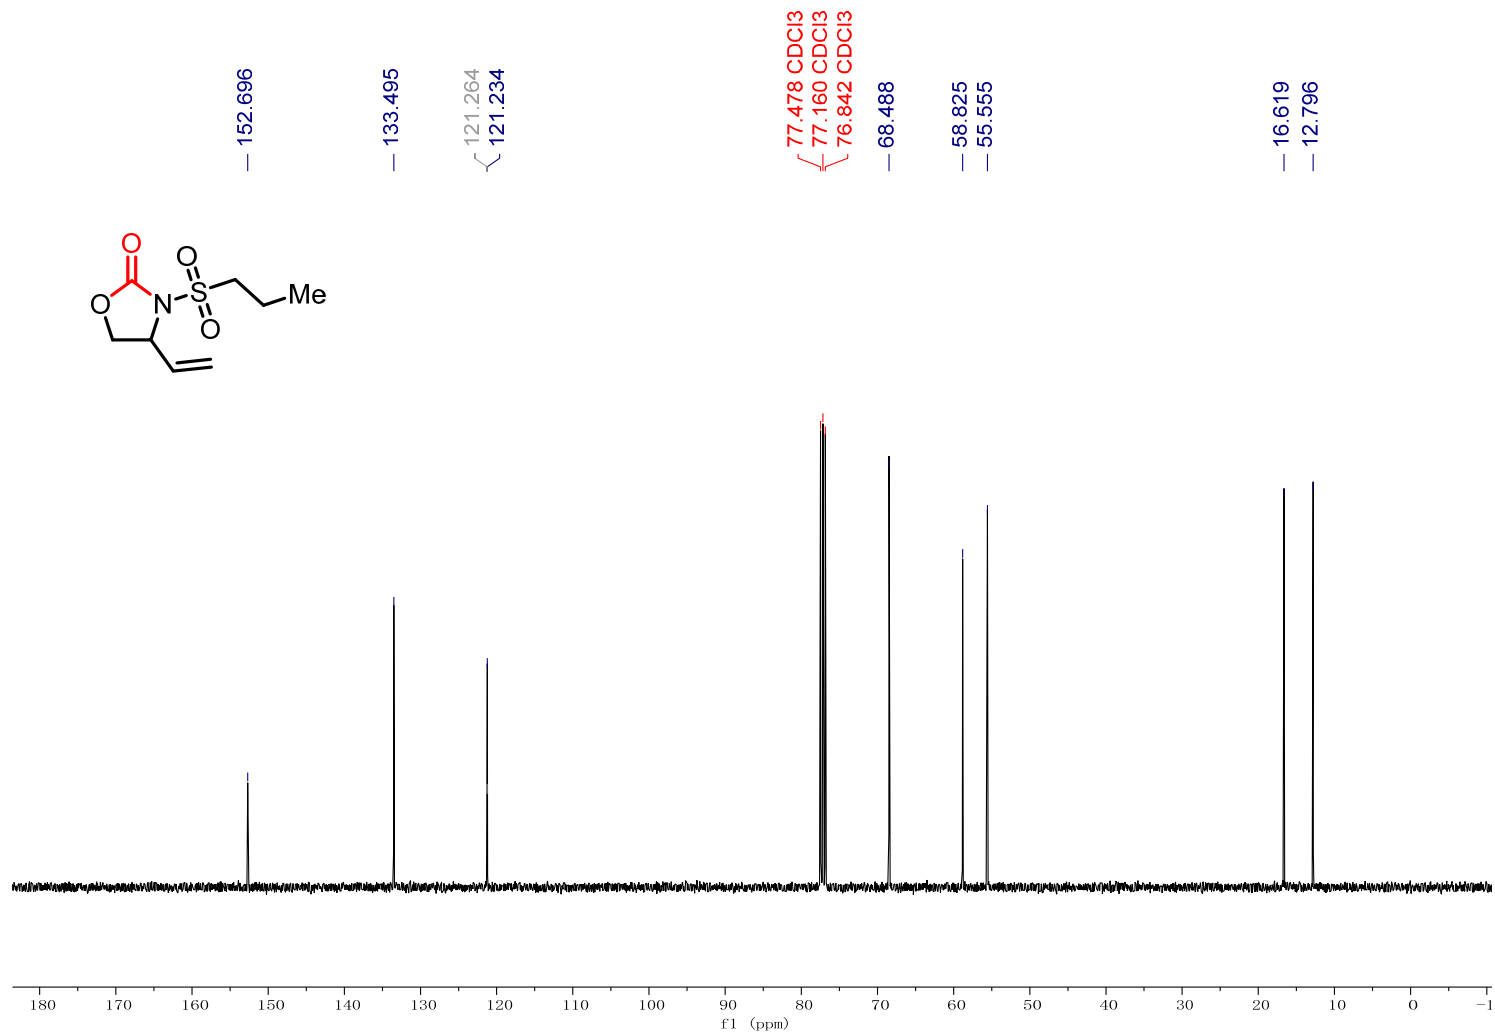

**<sup>1</sup>H NMR (400 MHz, CDCl<sub>3</sub>) Spectrum of 3-(ethylsulfonyl)-4-vinylloxazolidin-2-one 3n**

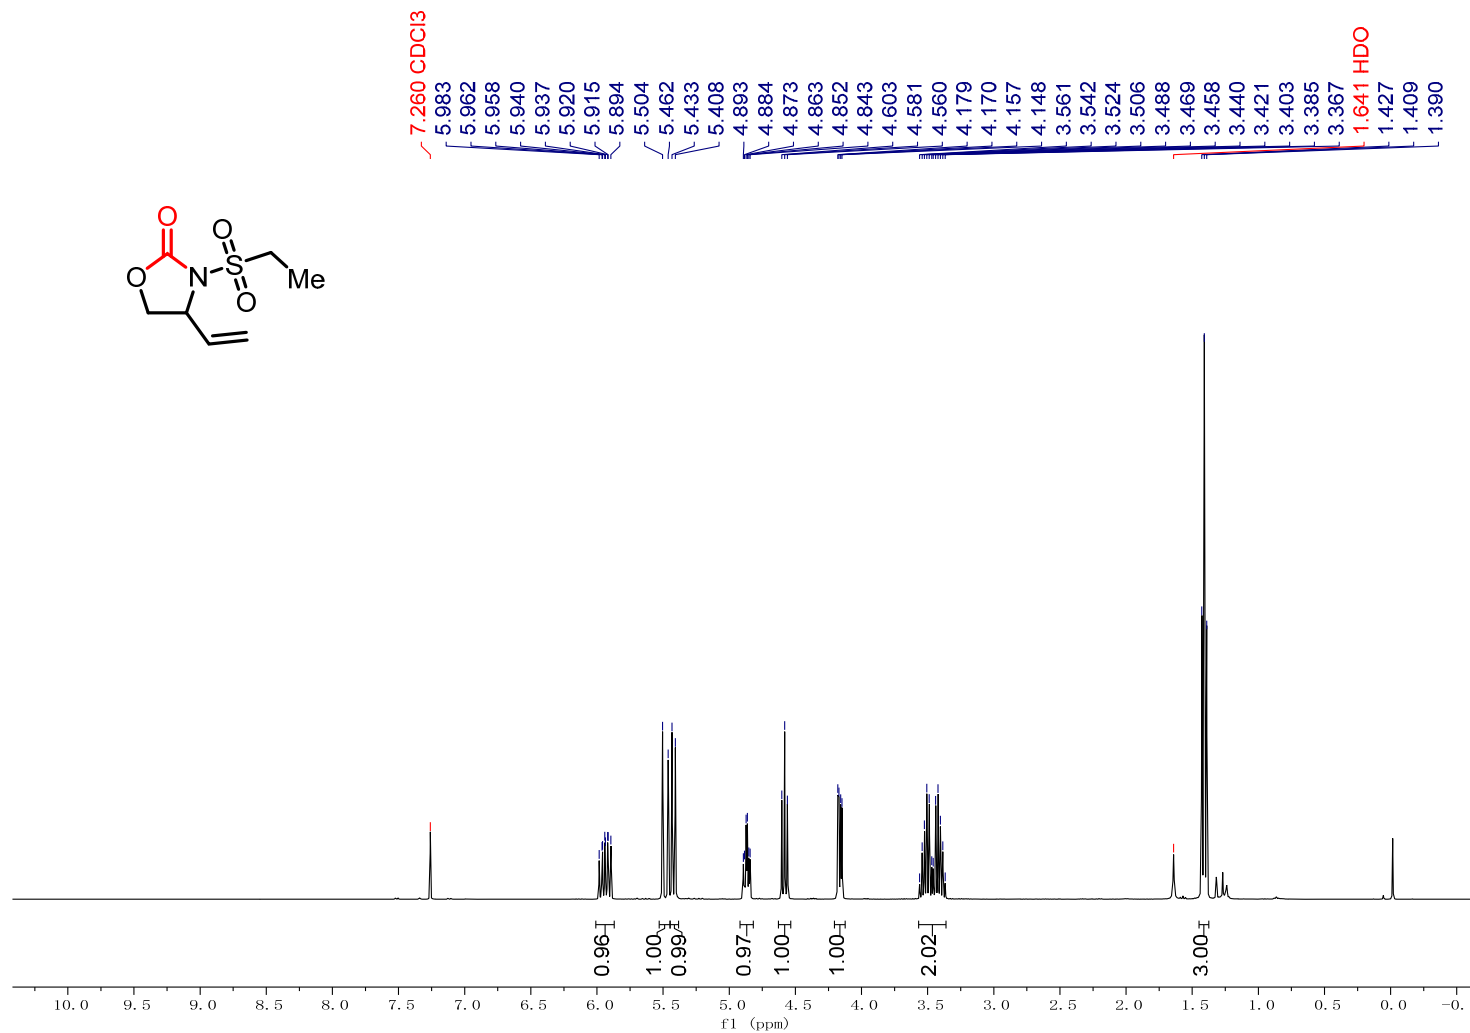

<sup>13</sup>C NMR (100 MHz, CDCl<sub>3</sub>) Spectrum of 3-(ethylsulfonyl)-4-vinylloxazolidin-2-one 3n

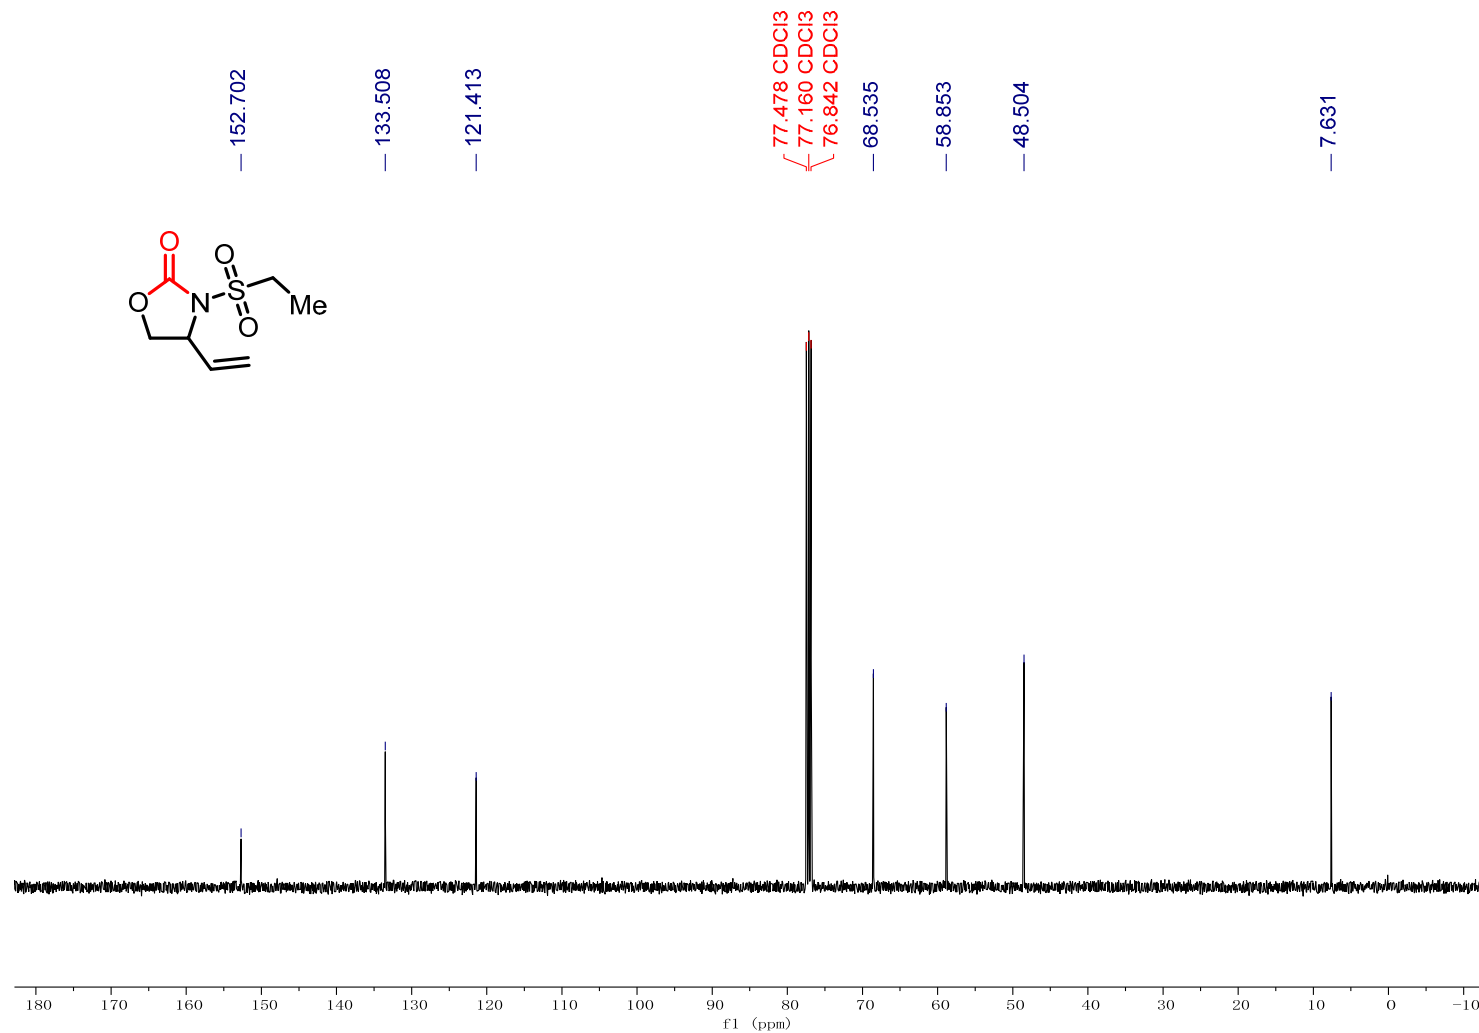

**<sup>1</sup>H NMR (400 MHz, CDCl<sub>3</sub>) Spectrum of 3-(isopropylsulfonyl)-4-vinylazolidin-2-one 3o**

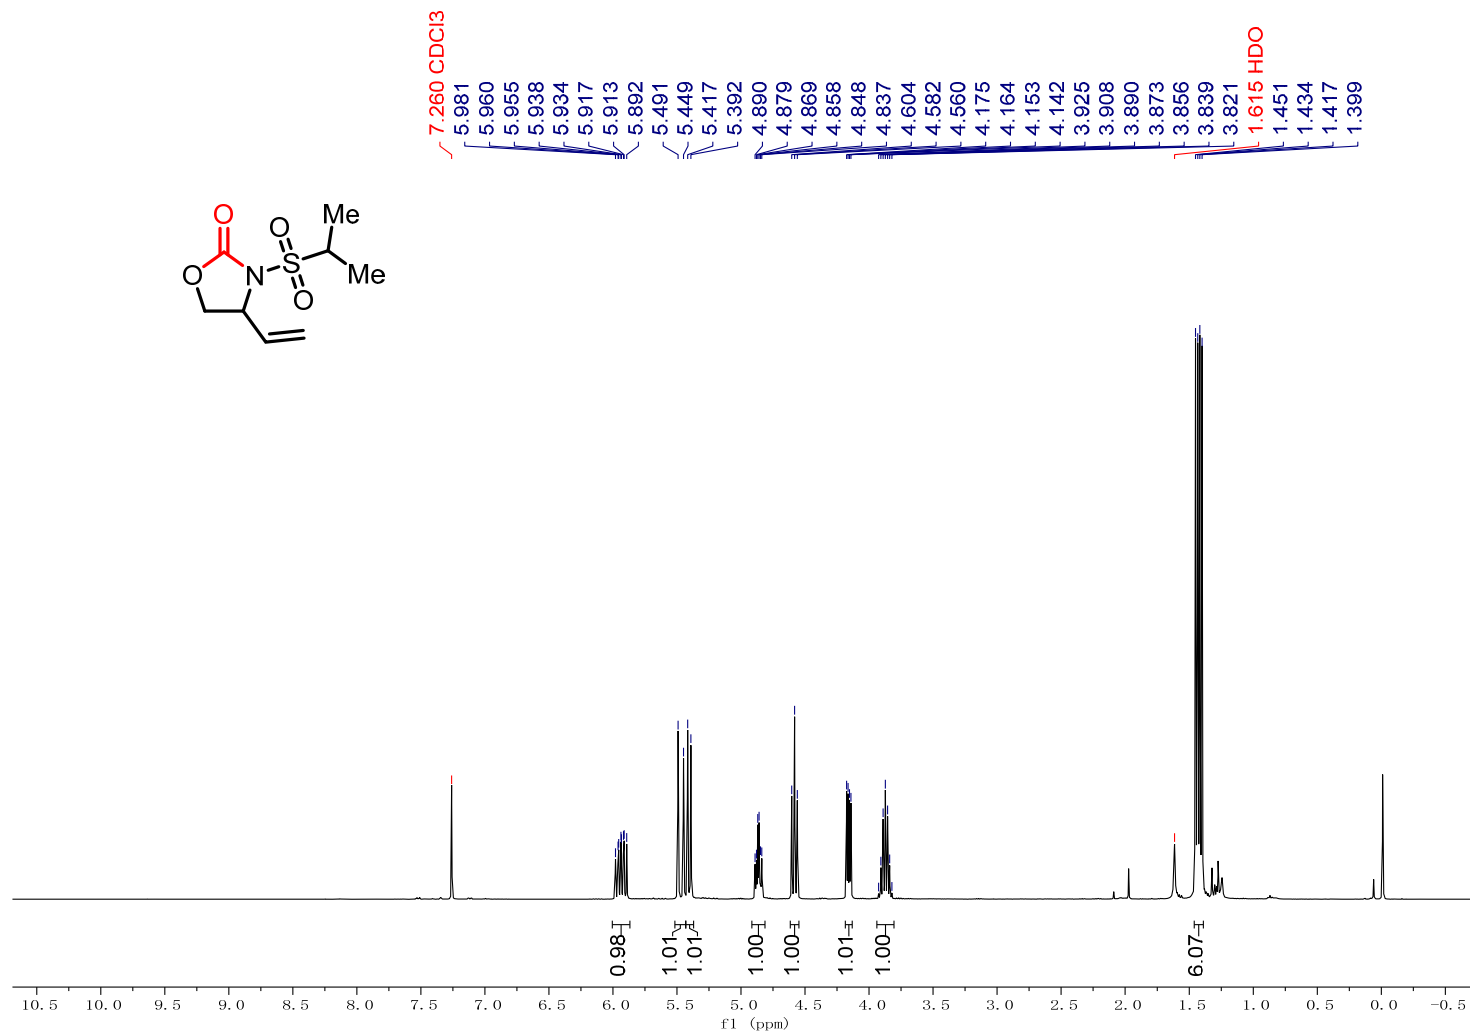

**<sup>13</sup>C NMR (100 MHz, CDCl<sub>3</sub>) Spectrum of 3-(isopropylsulfonyl)-4-vinylloxazolidin-2-one 3o**

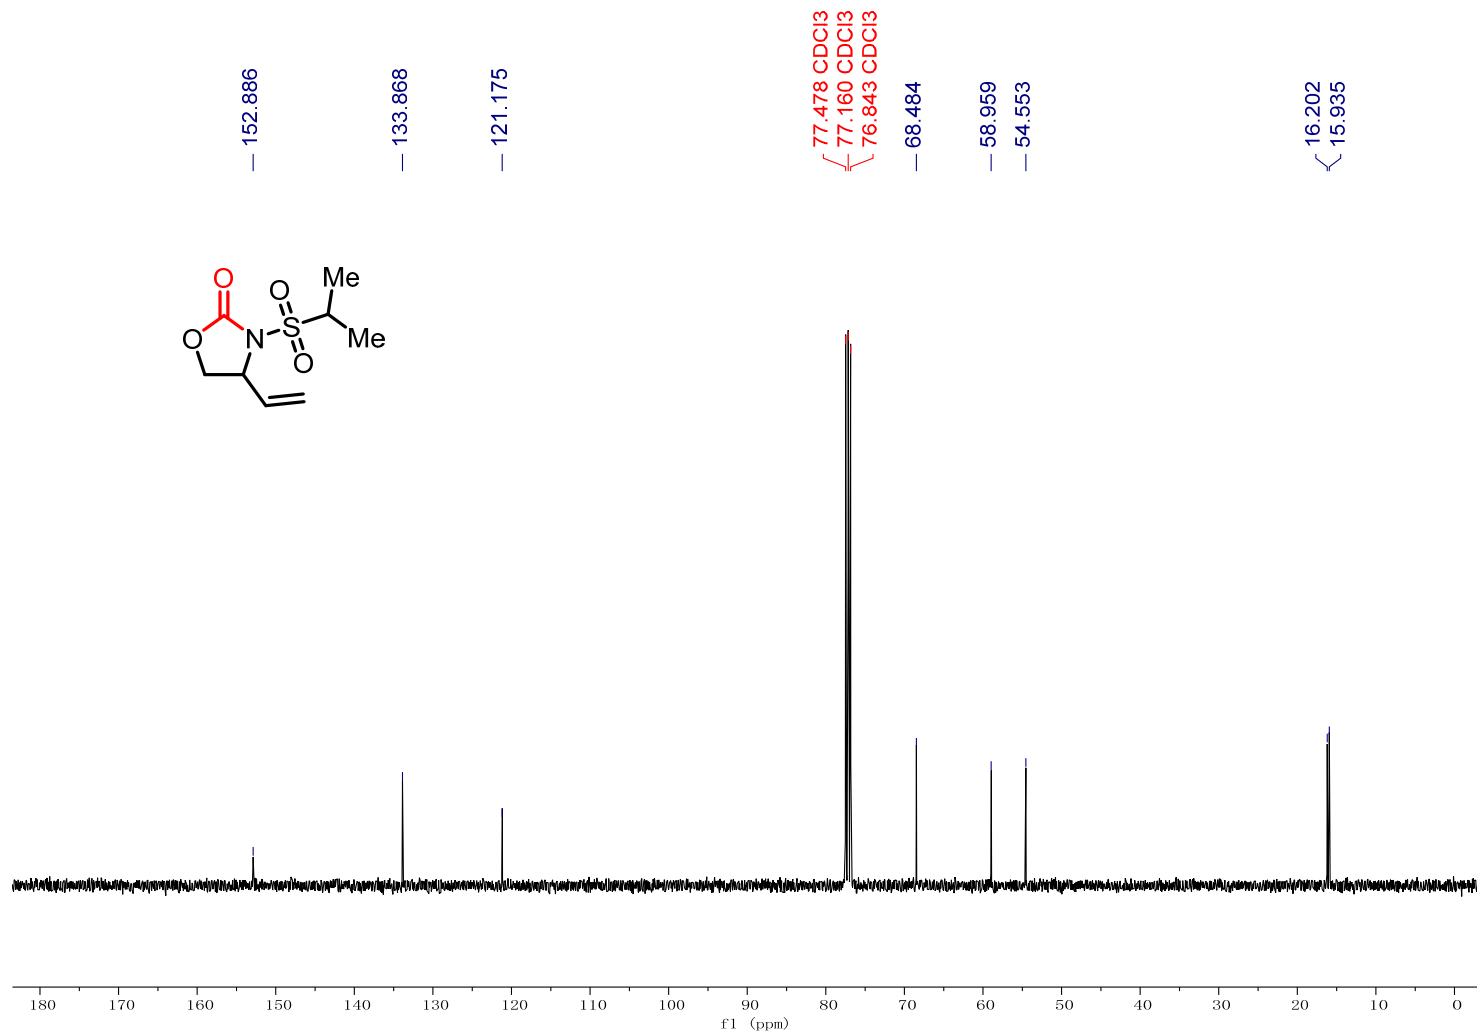

**<sup>1</sup>H NMR (400 MHz, CDCl<sub>3</sub>) Spectrum of 3-((1-allylcyclopropyl)sulfonyl)-4-vinylloxazolidin-2-one 3p**

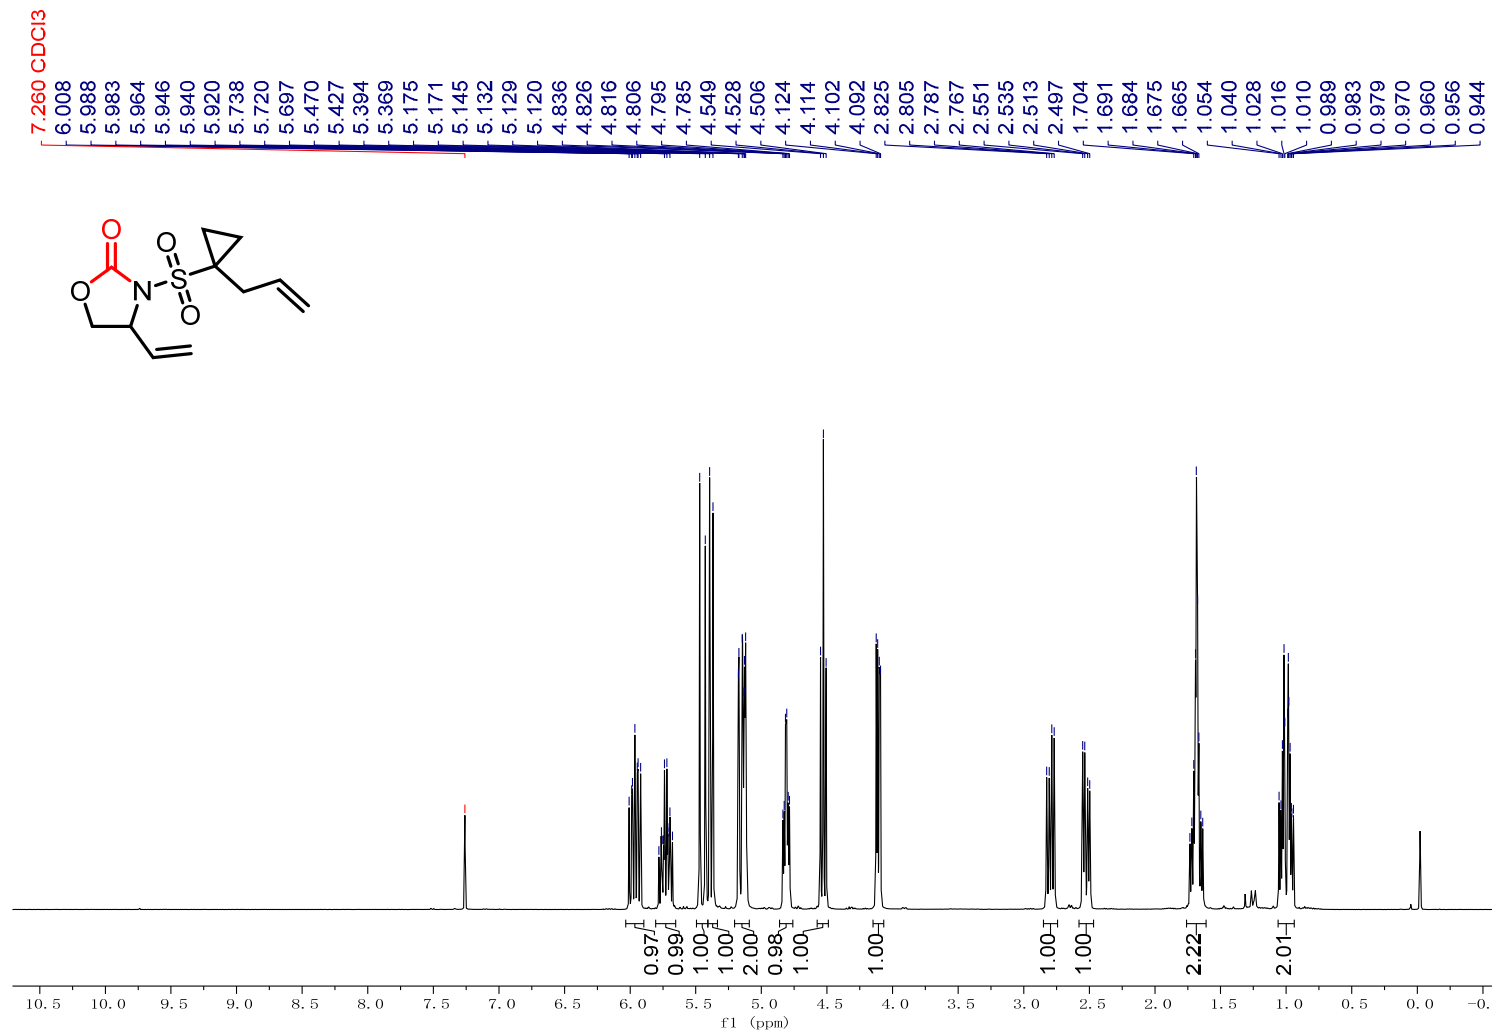

**<sup>13</sup>C NMR (100 MHz, CDCl<sub>3</sub>) Spectrum of 3-((1-allylcyclopropyl)sulfonyl)-4-vinyloxazolidin-2-one 3p**

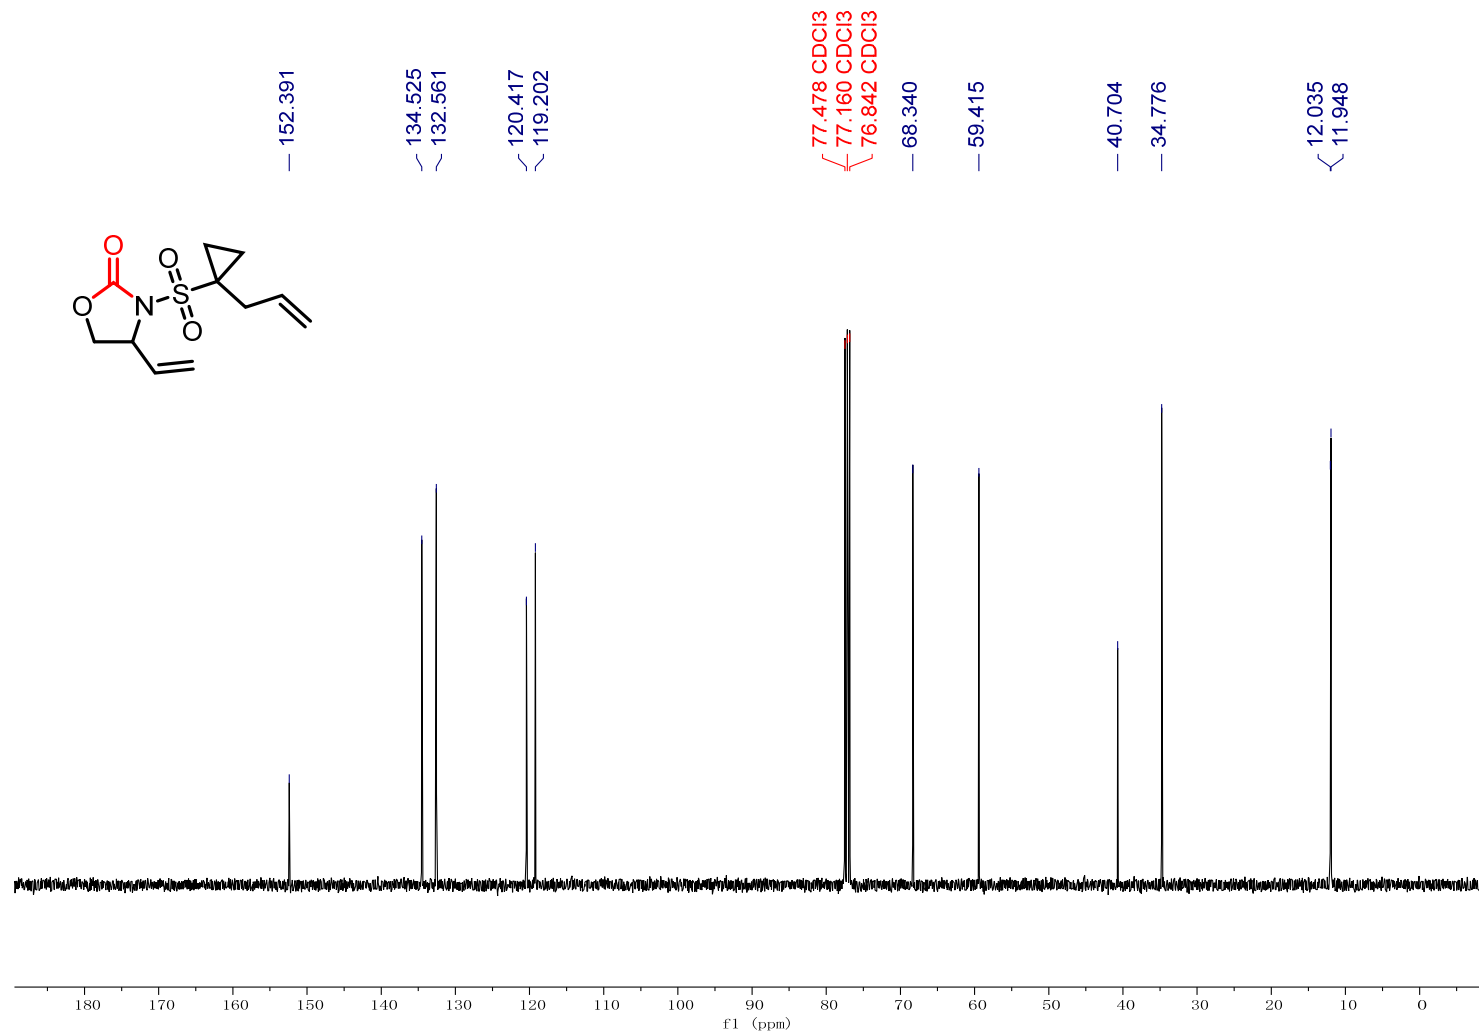



**<sup>1</sup>H NMR (400 MHz, CDCl<sub>3</sub>) Spectrum of 5-chloro-2-methoxy-N-(4-((2-oxo-4-vinylloxazolidin-3-yl)sulfonyl)phenethyl)benzamide 3q**

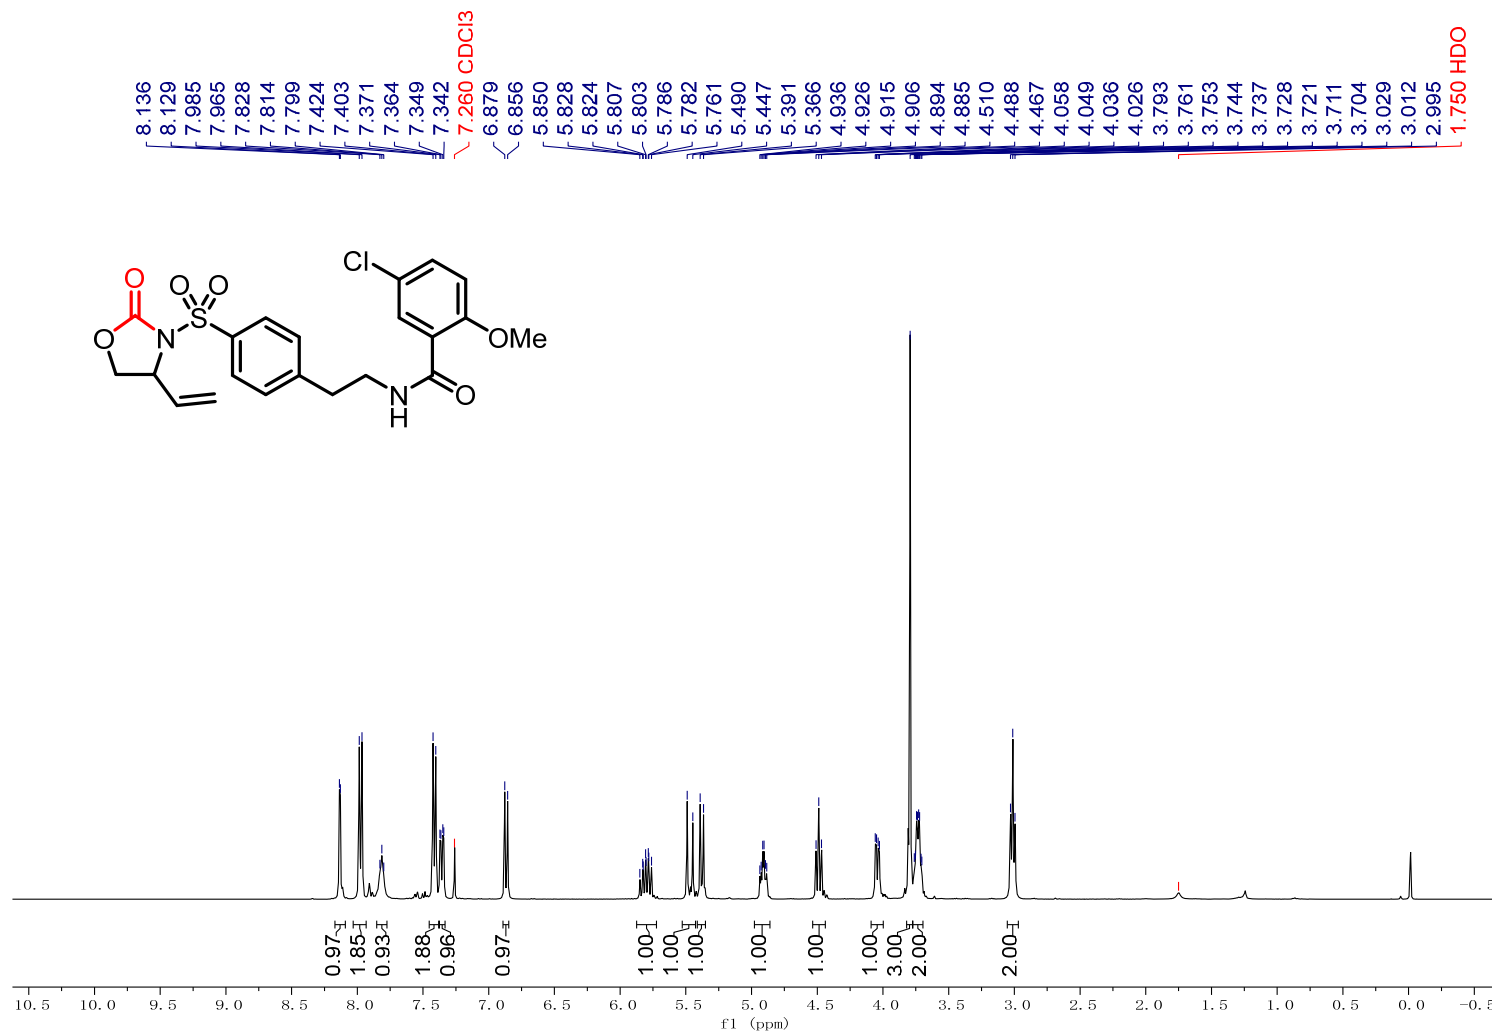

<sup>13</sup>C NMR (100 MHz, CDCl<sub>3</sub>) Spectrum of 5-chloro-2-methoxy-N-(4-((2-oxo-4-vinylloxazolidin-3-yl)sulfonyl)phenethyl)benzamide 3q

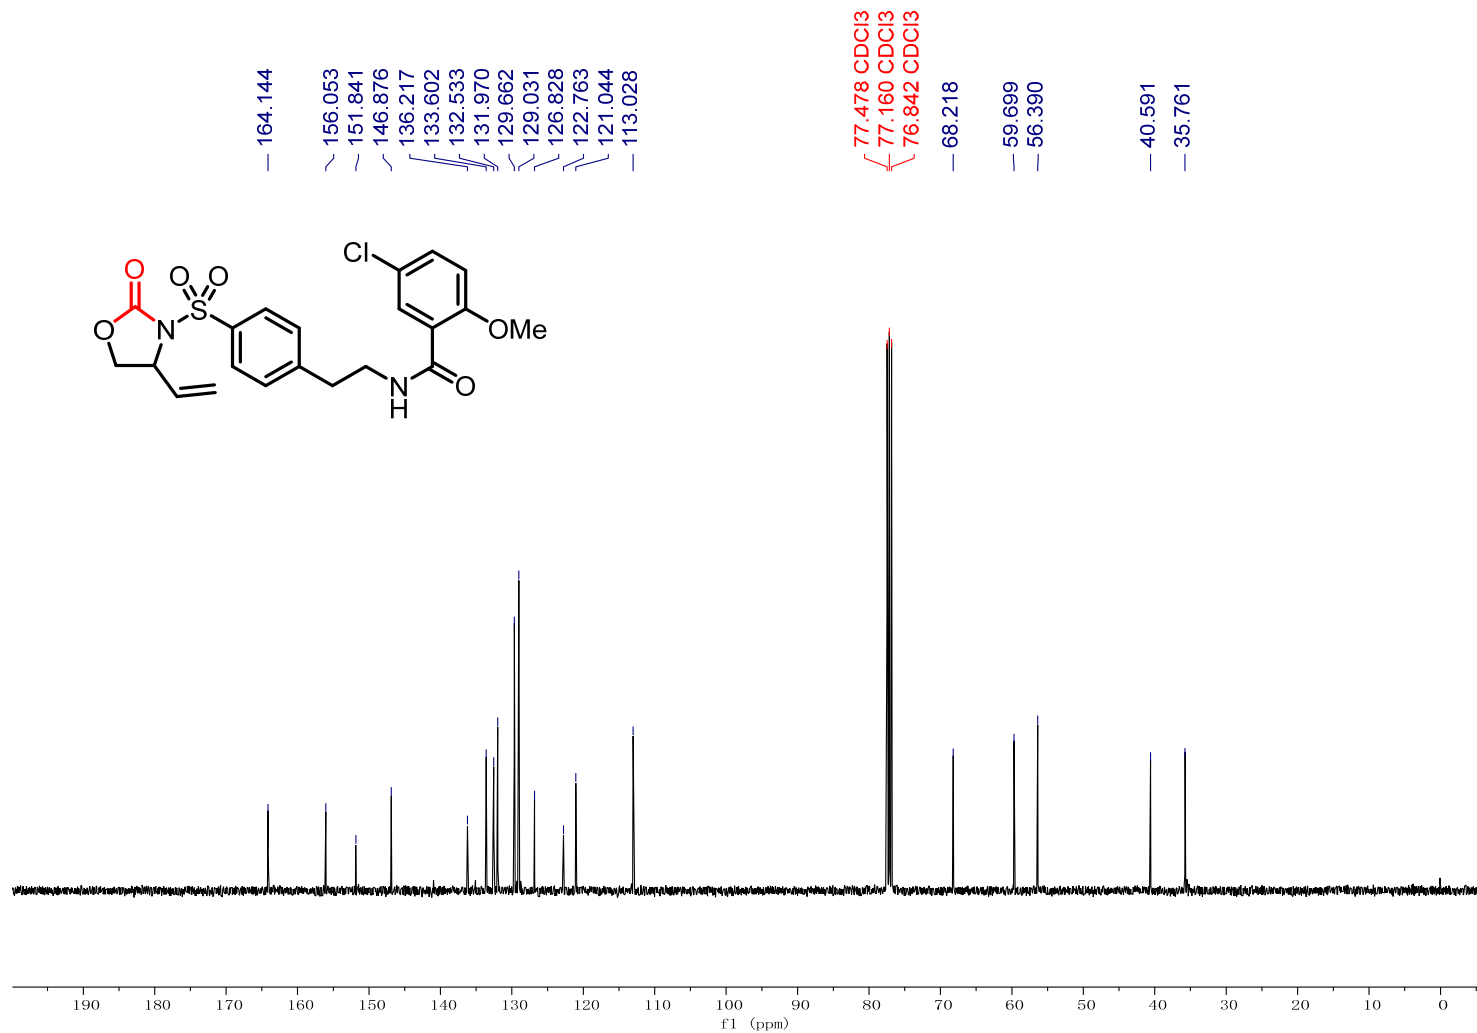

**<sup>1</sup>H NMR (400 MHz, CDCl<sub>3</sub>) Spectrum of 4-methyl-3-tosyl-4-vinylazolidin-2-one 3r**

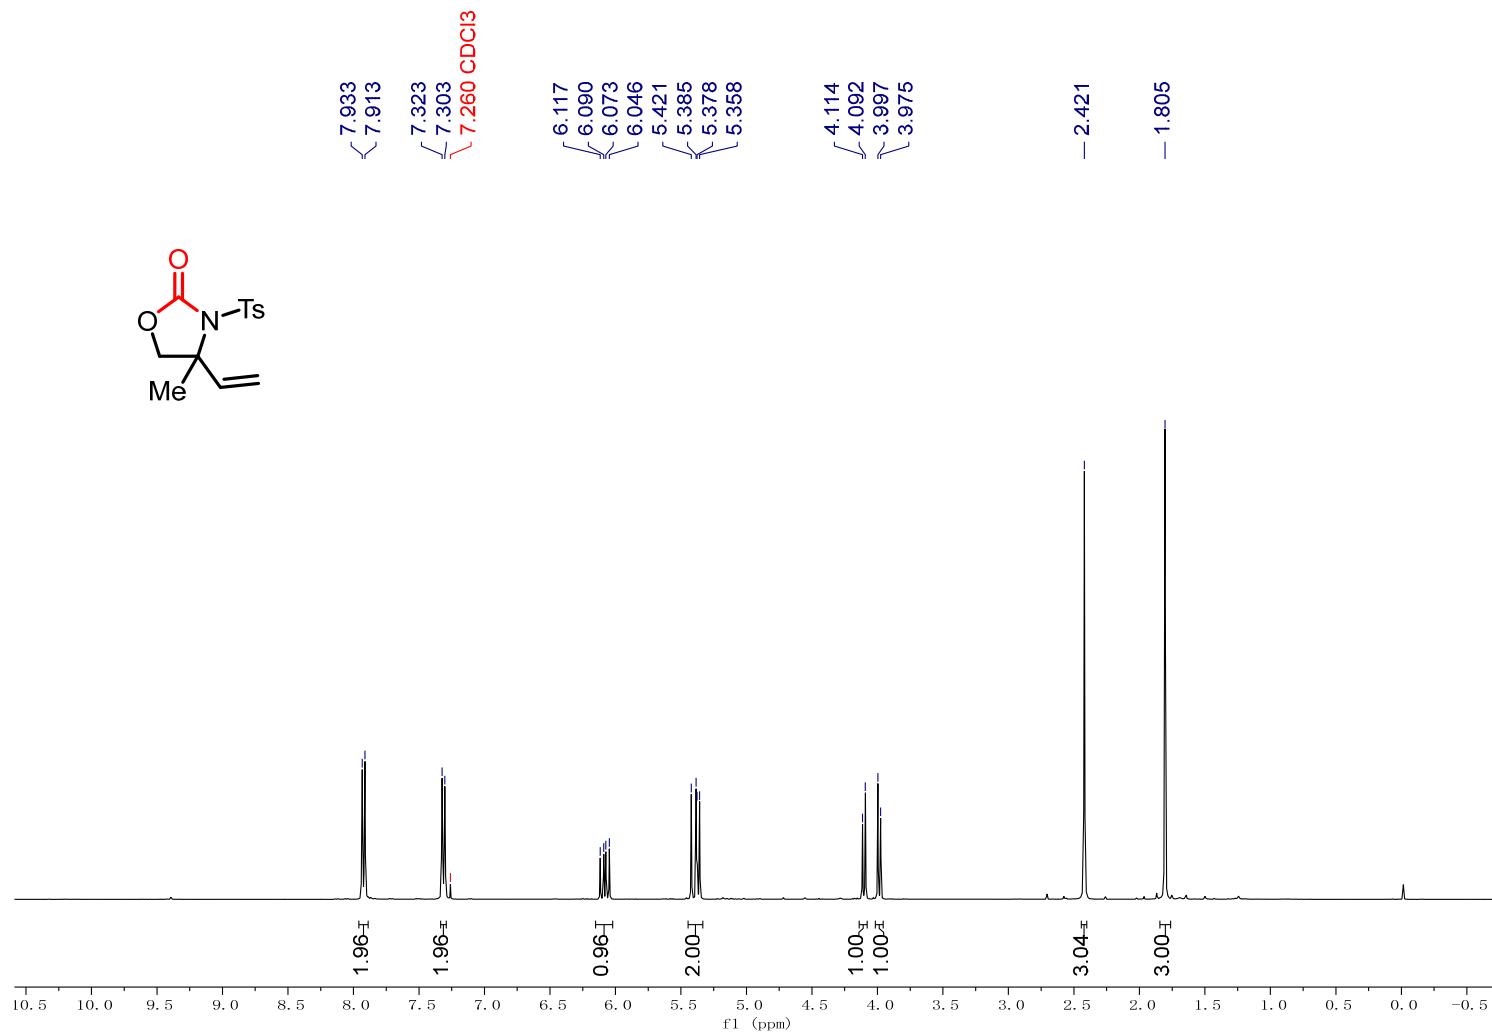

<sup>13</sup>C NMR (100 MHz, CDCl<sub>3</sub>) Spectrum of 4-methyl-3-tosyl-4-vinylloxazolidin-2-one 3r

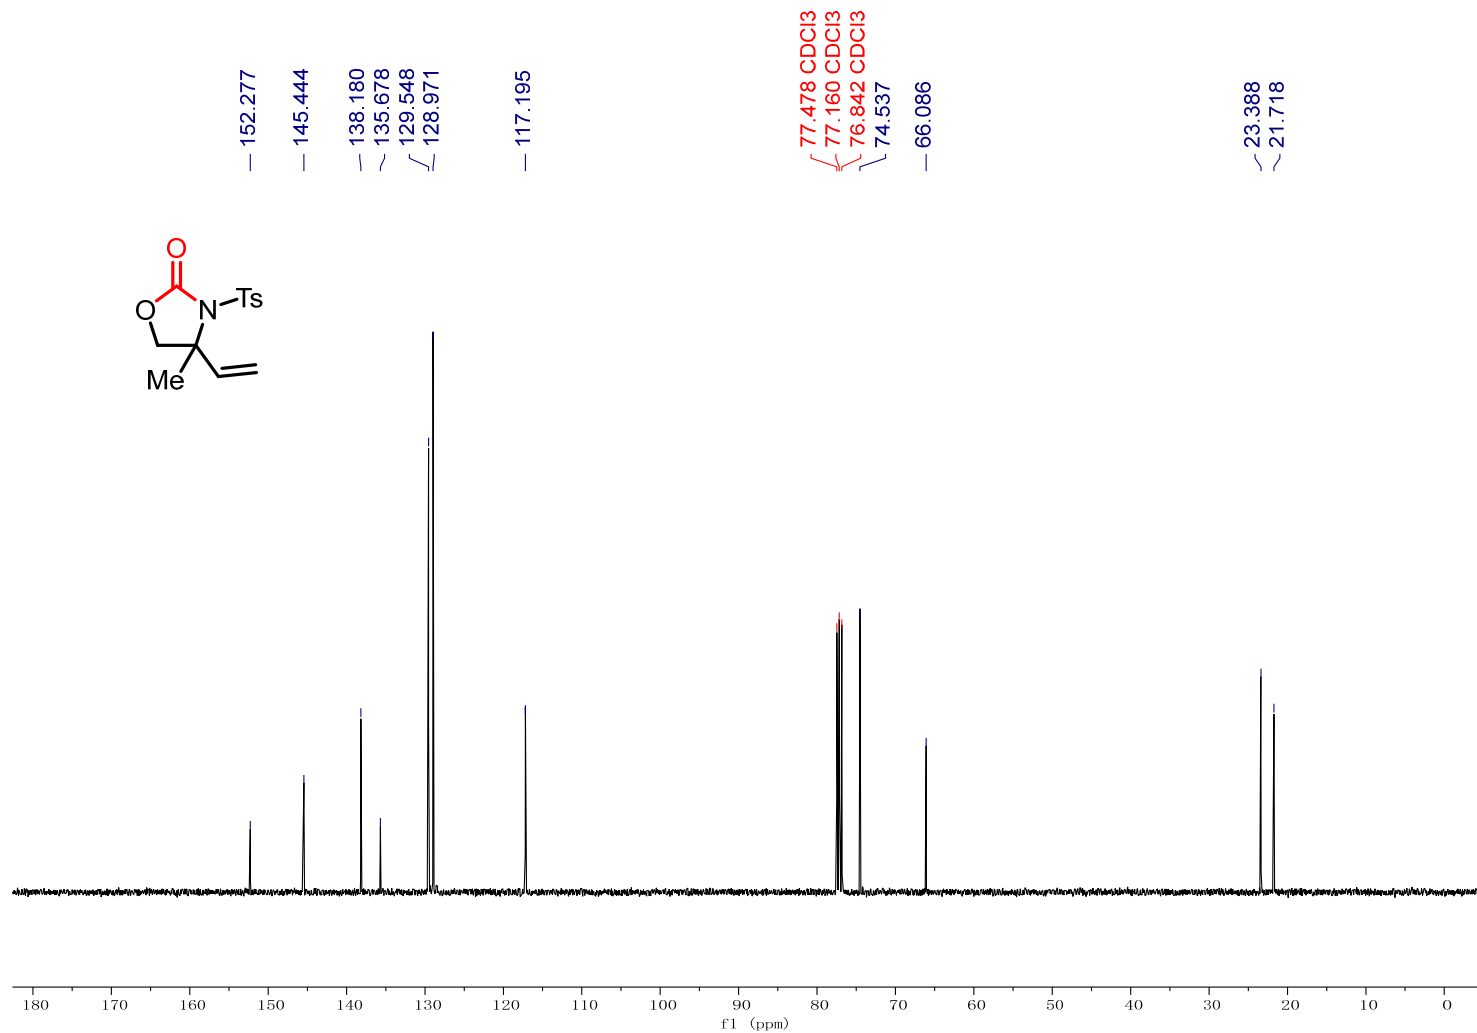

**<sup>1</sup>H NMR (400 MHz, CDCl<sub>3</sub>) Spectrum of (E)-4-(3-(benzyloxy)prop-1-en-1-yl)-5-methyl-3-tosyloxazolidin-2-one 3s**

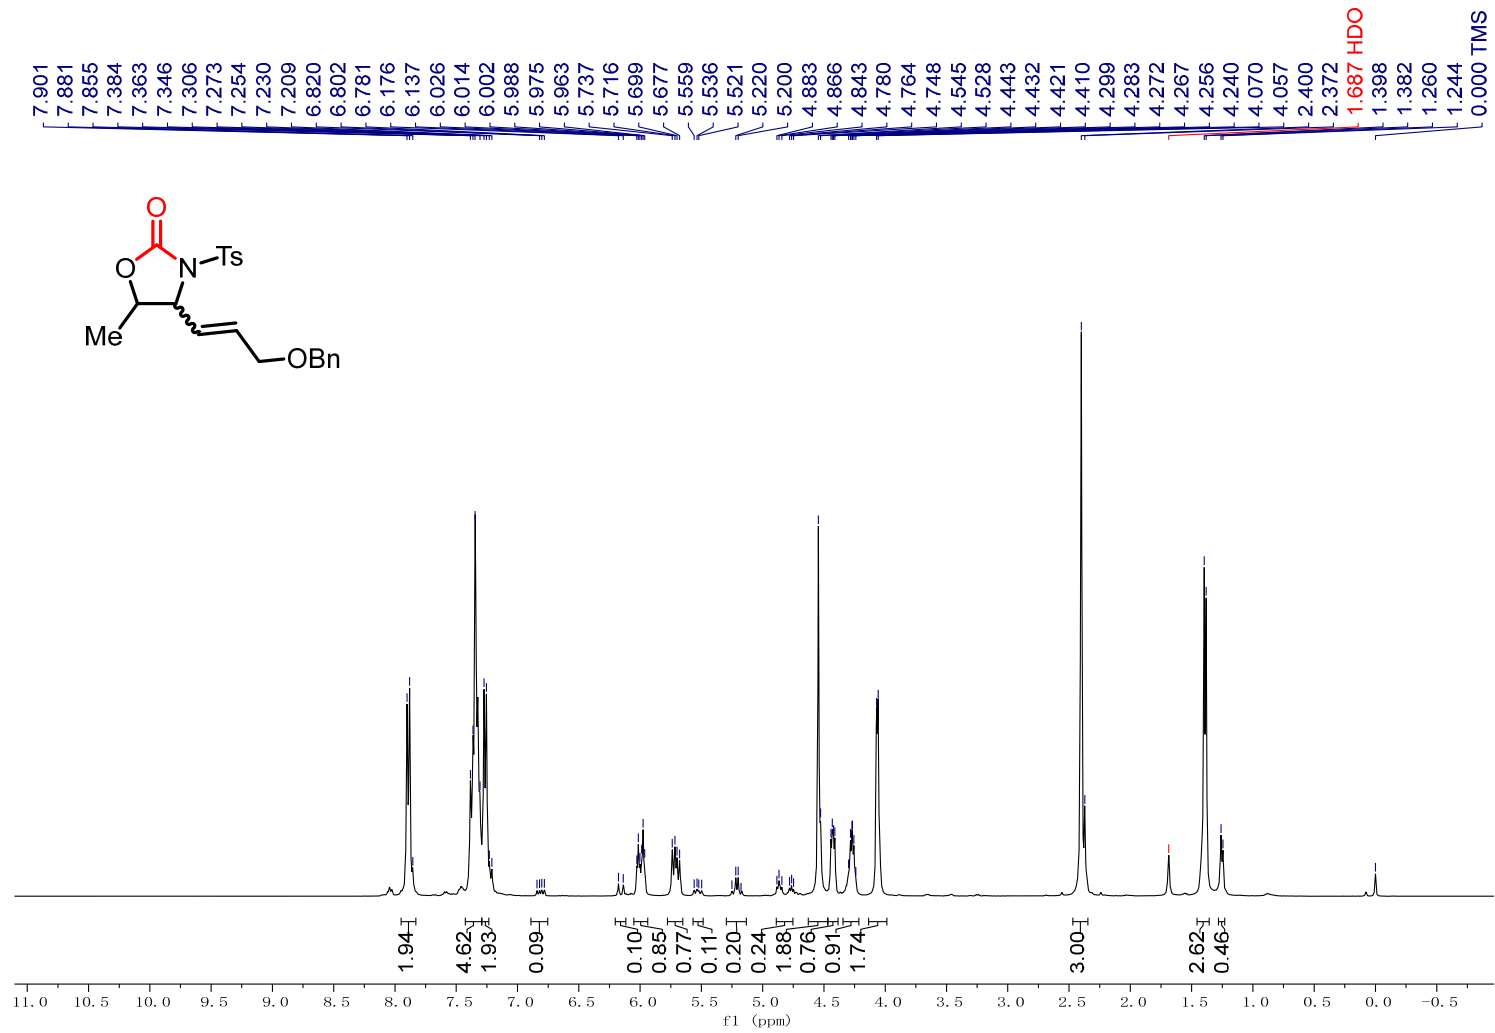

<sup>13</sup>C NMR (100 MHz, CDCl<sub>3</sub>) Spectrum of (*E*)-4-(3-(benzyloxy)prop-1-en-1-yl)-5-methyl-3-tosyloxazolidin-2-one 3s

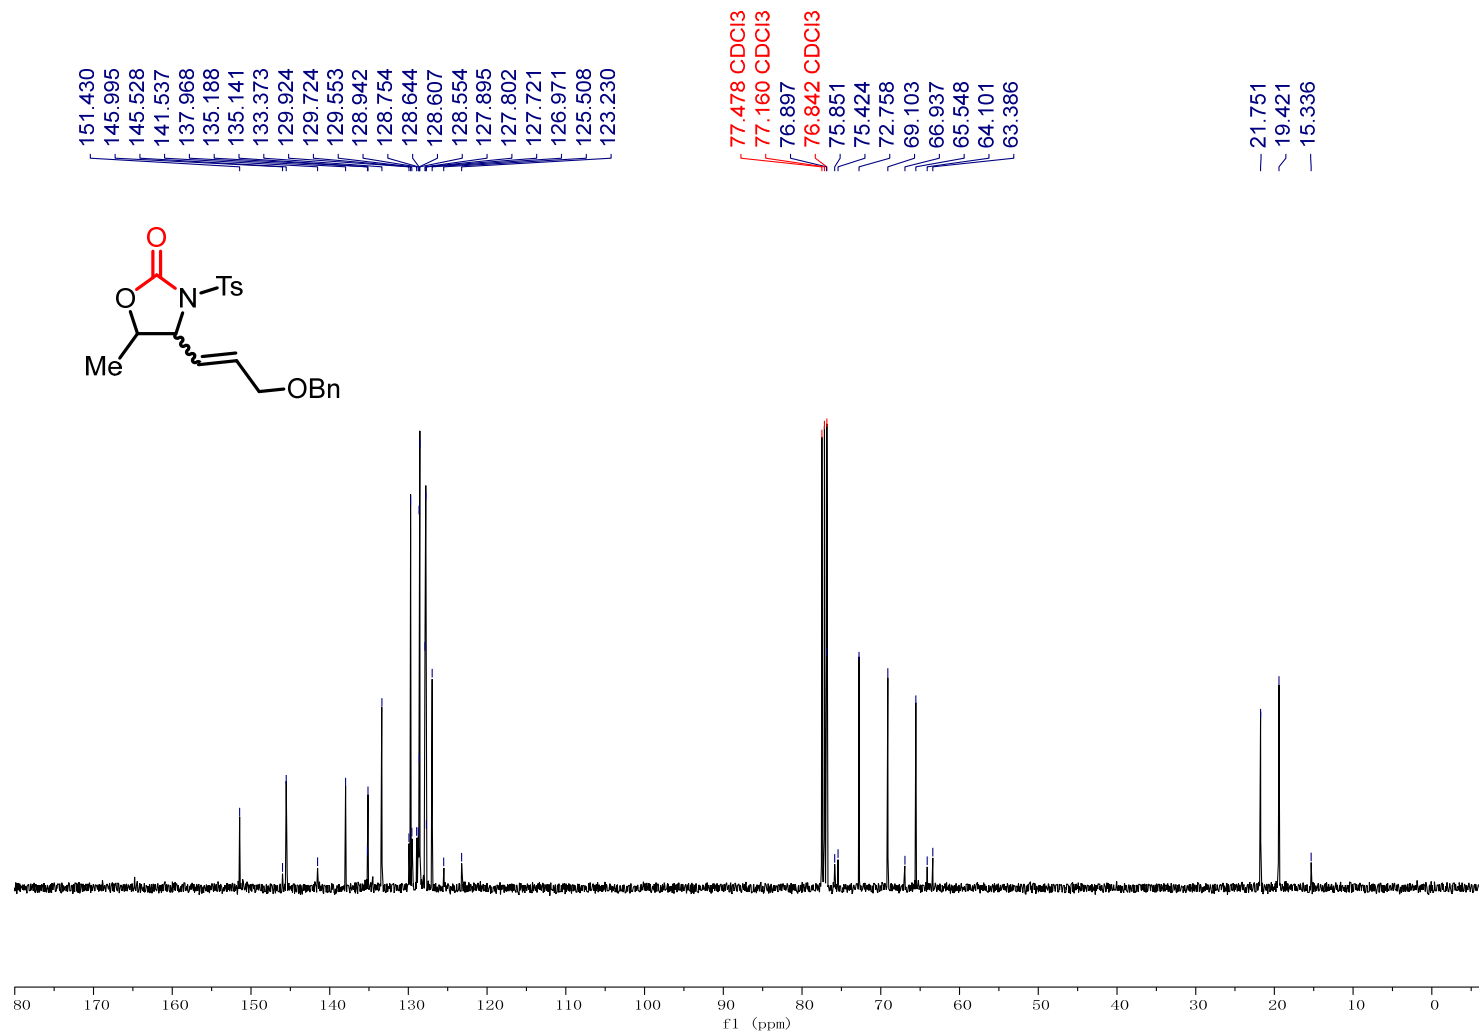

<sup>1</sup>H NMR (400 MHz, CDCl<sub>3</sub>) Spectrum of (*E*)-5-((benzyloxy)methyl)-4-(prop-1-en-1-yl)-3-tosyloxazolidin-2-one 3t

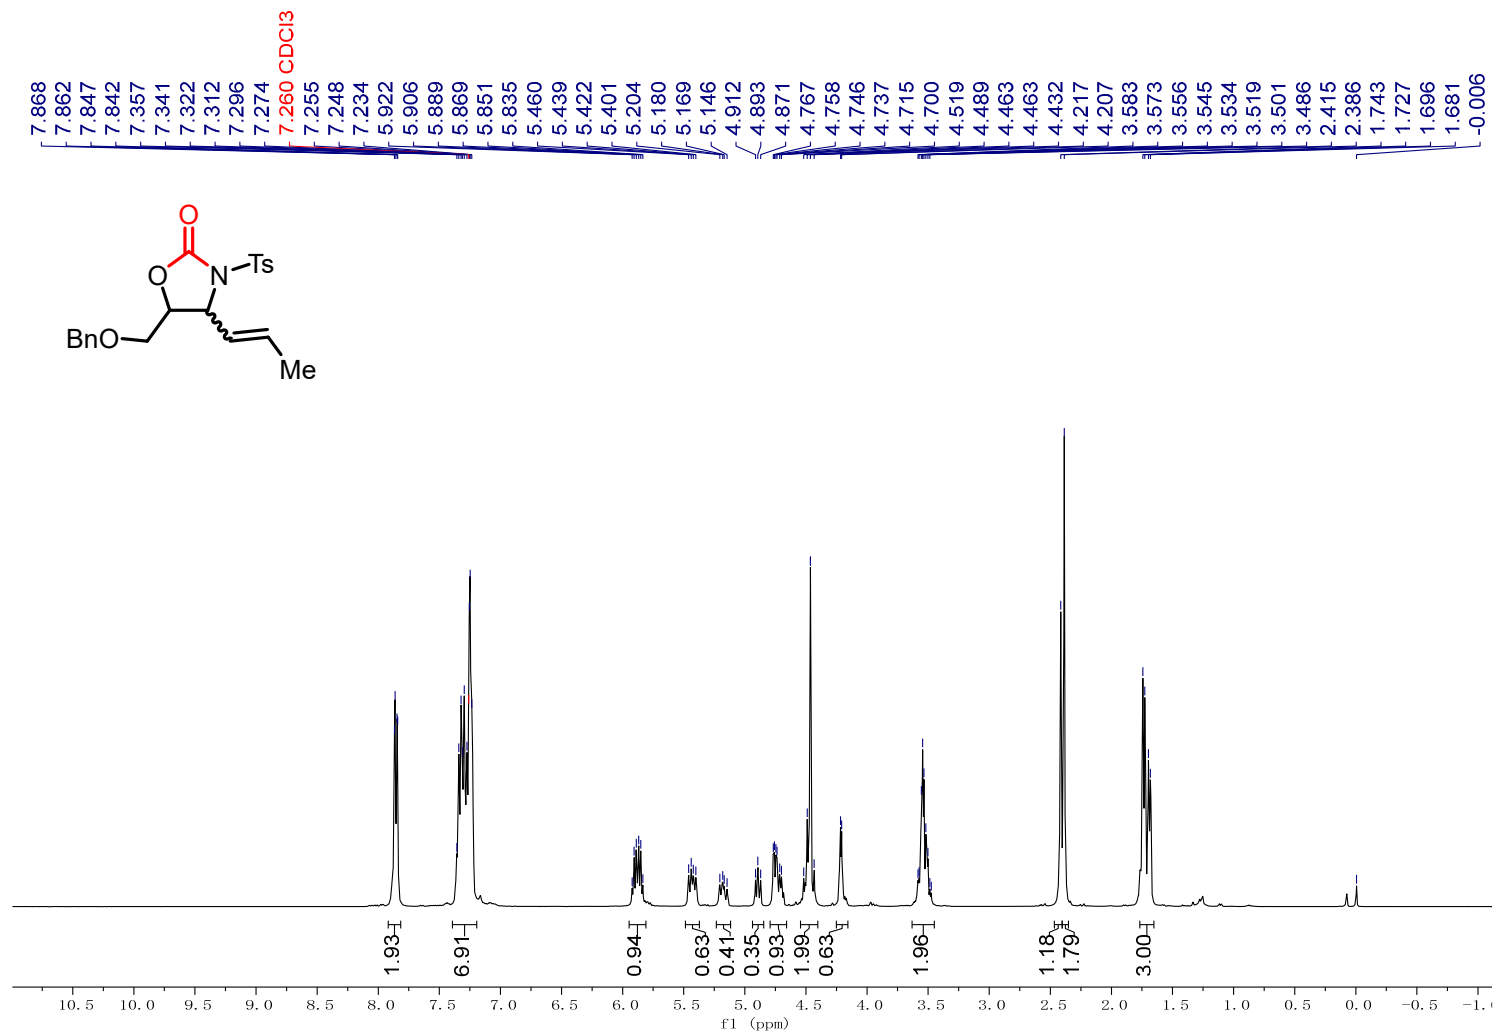

**<sup>13</sup>C NMR (100 MHz, CDCl<sub>3</sub>) Spectrum of (*E*)-5-((benzyloxy)methyl)-4-(prop-1-en-1-yl)-3-tosyloxazolidin-2-one 3t**

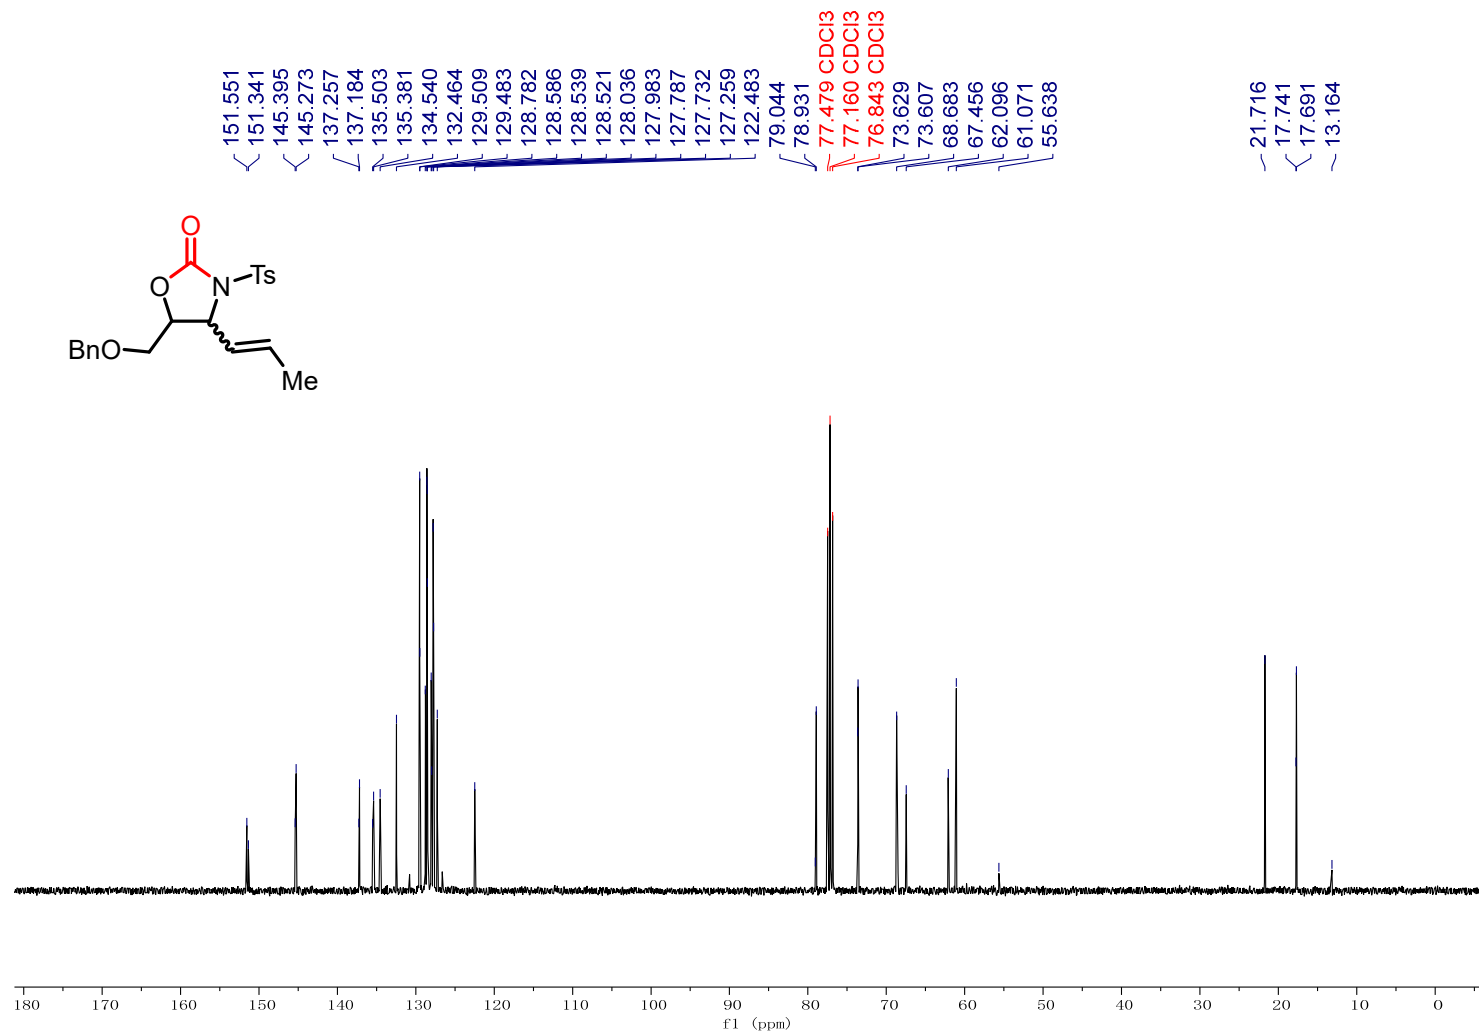



**<sup>1</sup>H NMR (400 MHz, CDCl<sub>3</sub>) Spectrum of 3-tosyl-3a,6,7,7a-tetrahydrobenzo[d]oxazol-2(3H)-one 3u**

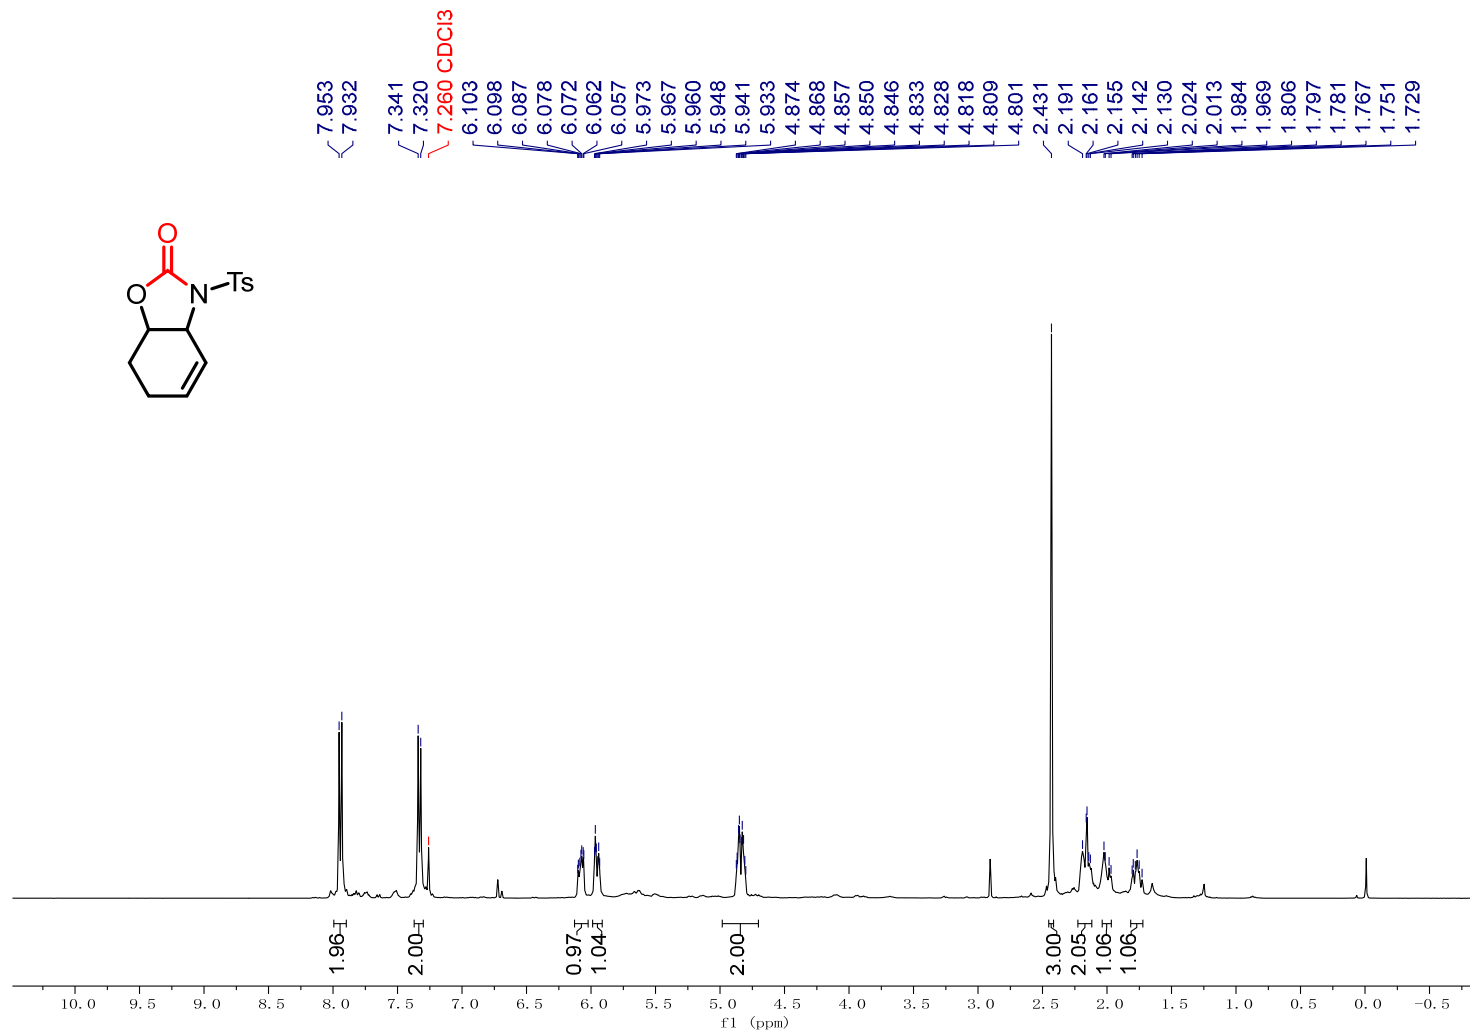

**<sup>1</sup>H NMR (400 MHz, CDCl<sub>3</sub>) Spectrum of 5-phenyl-3-tosyl-4-vinylloxazolidin-2-one 3v**

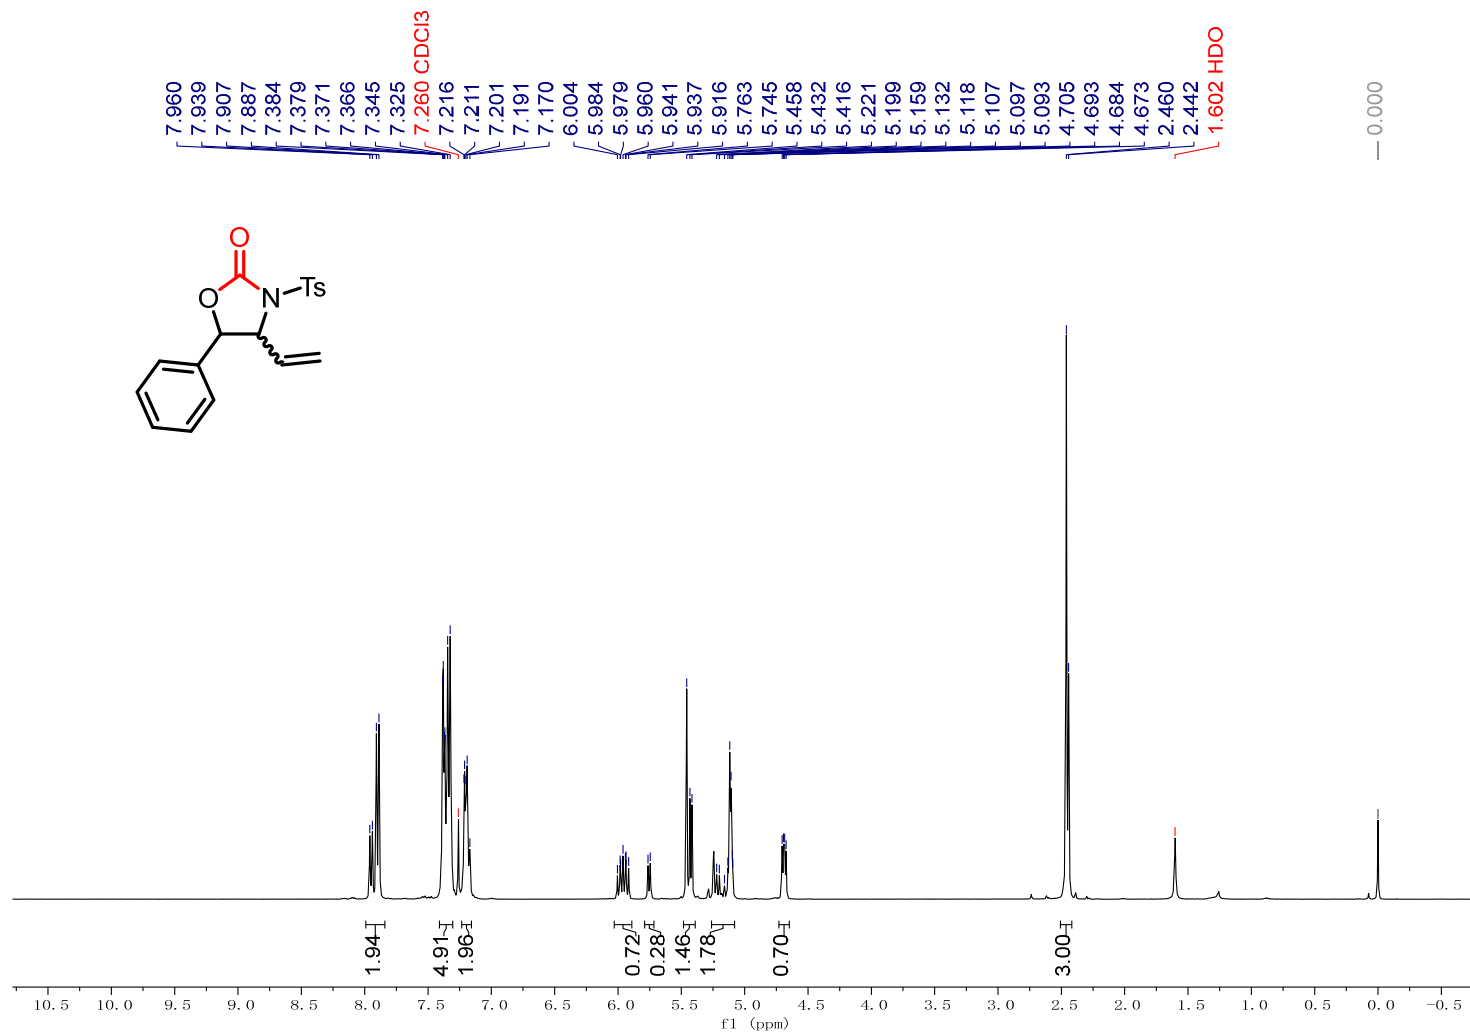

<sup>13</sup>C NMR (100 MHz, CDCl<sub>3</sub>) Spectrum of 5-phenyl-3-tosyl-4-vinylloxazolidin-2-one 3v

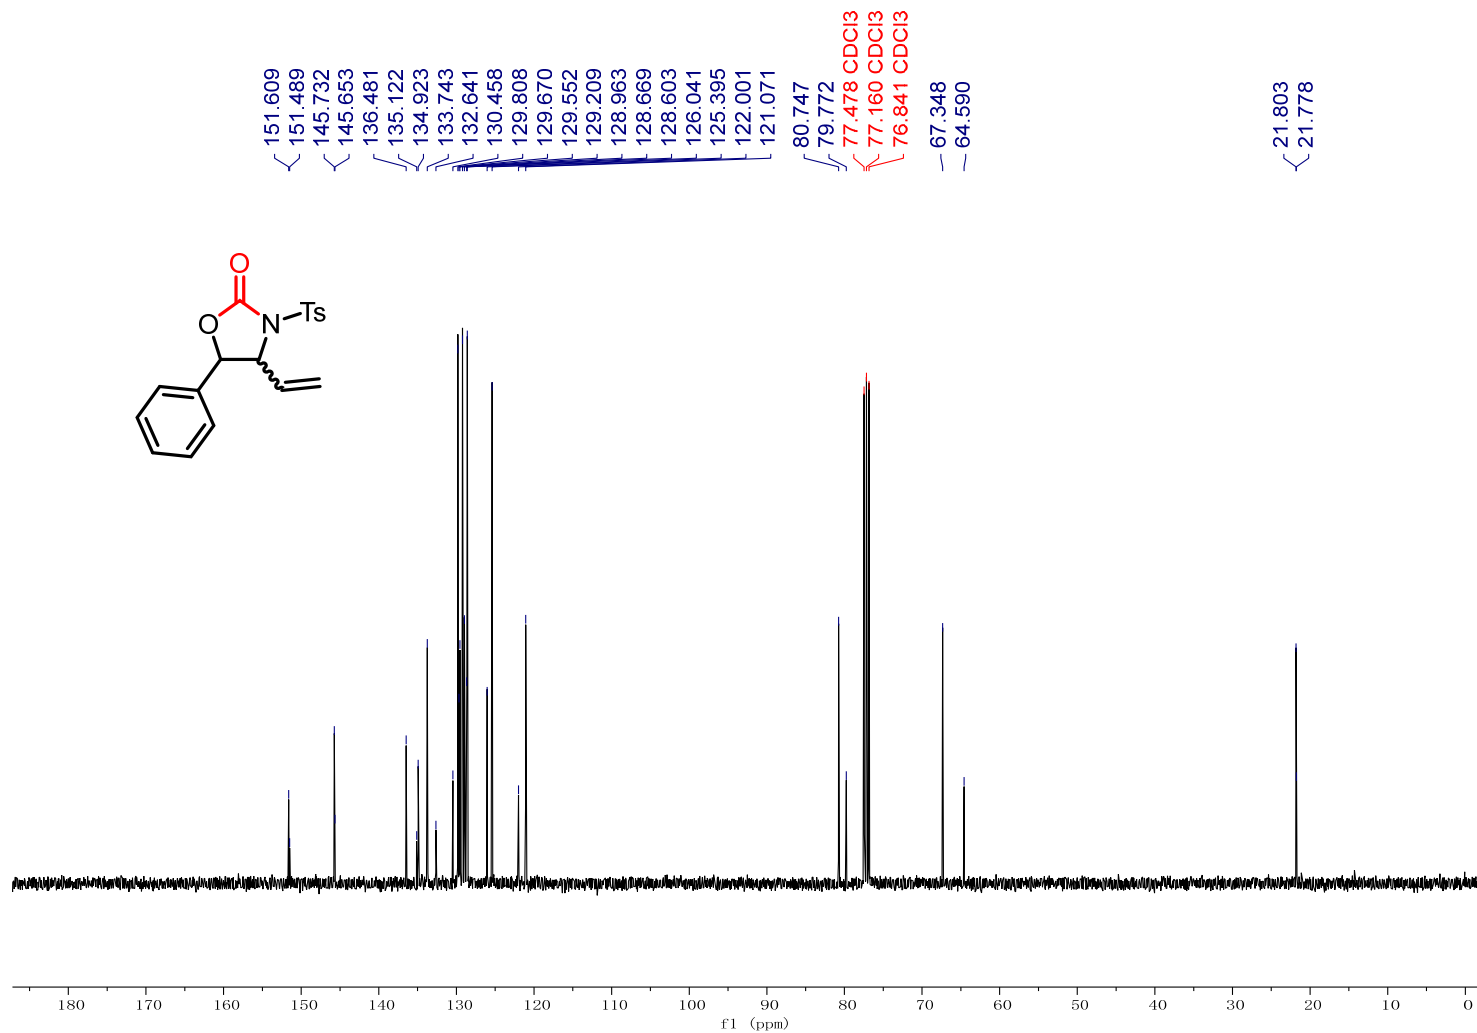

<sup>1</sup>H NMR (400 MHz, CDCl<sub>3</sub>) Spectrum of 5-(4-methoxyphenyl)-3-tosyl-4-vinylloxazolidin-2-one 3w

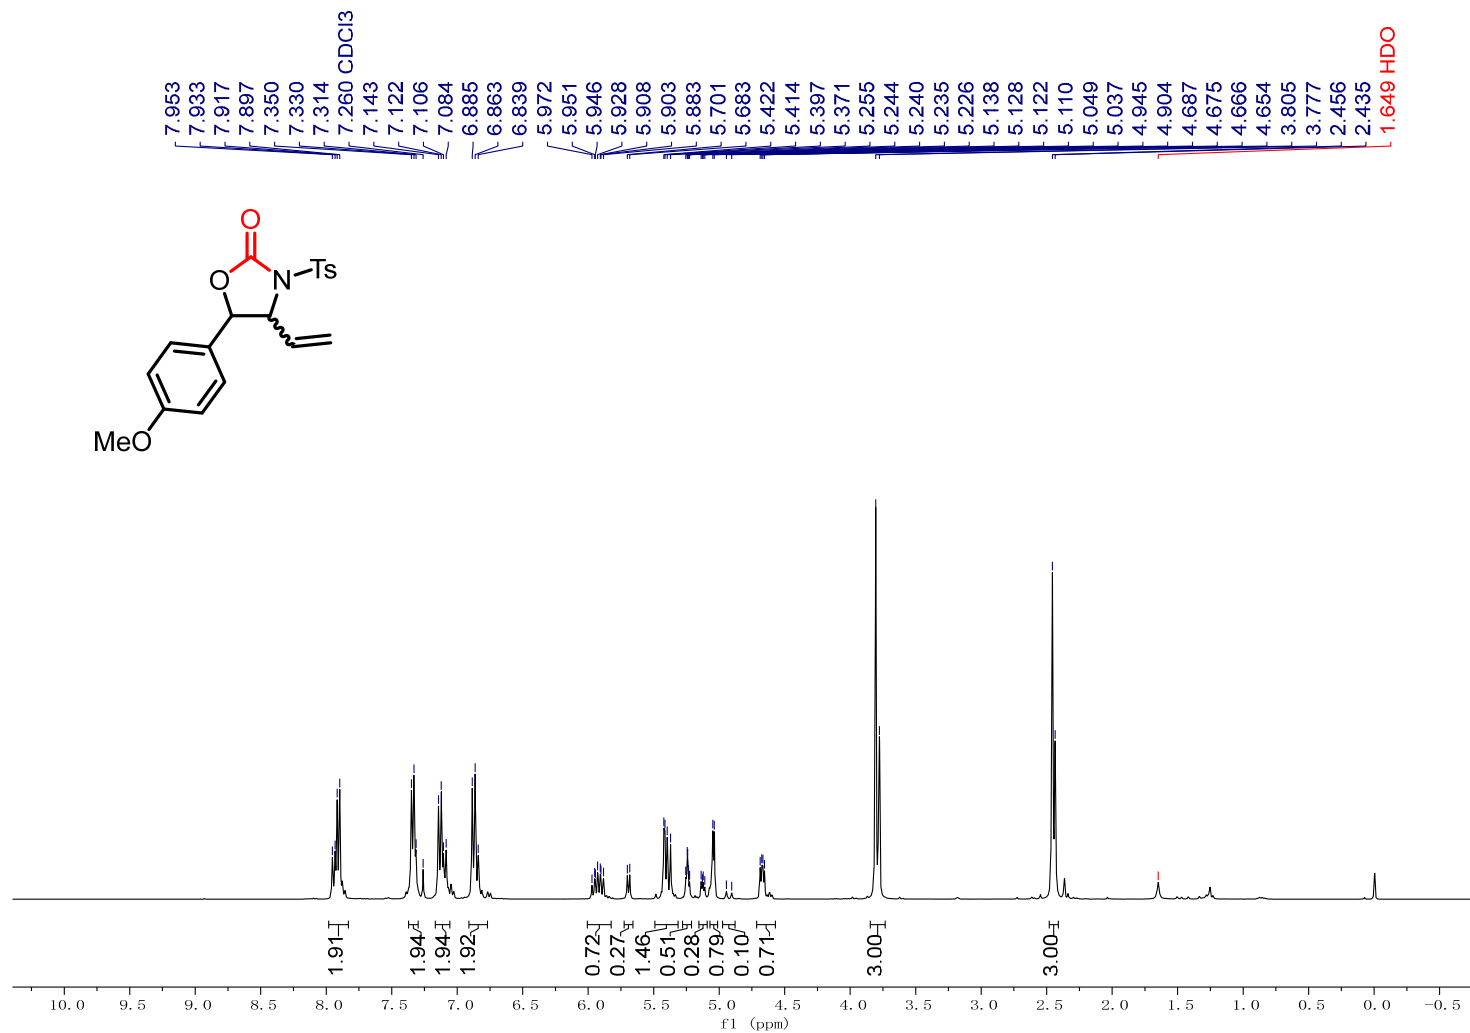

<sup>13</sup>C NMR (100 MHz, CDCl<sub>3</sub>) Spectrum of 5-(4-methoxyphenyl)-3-tosyl-4-vinylloxazolidin-2-one 3w

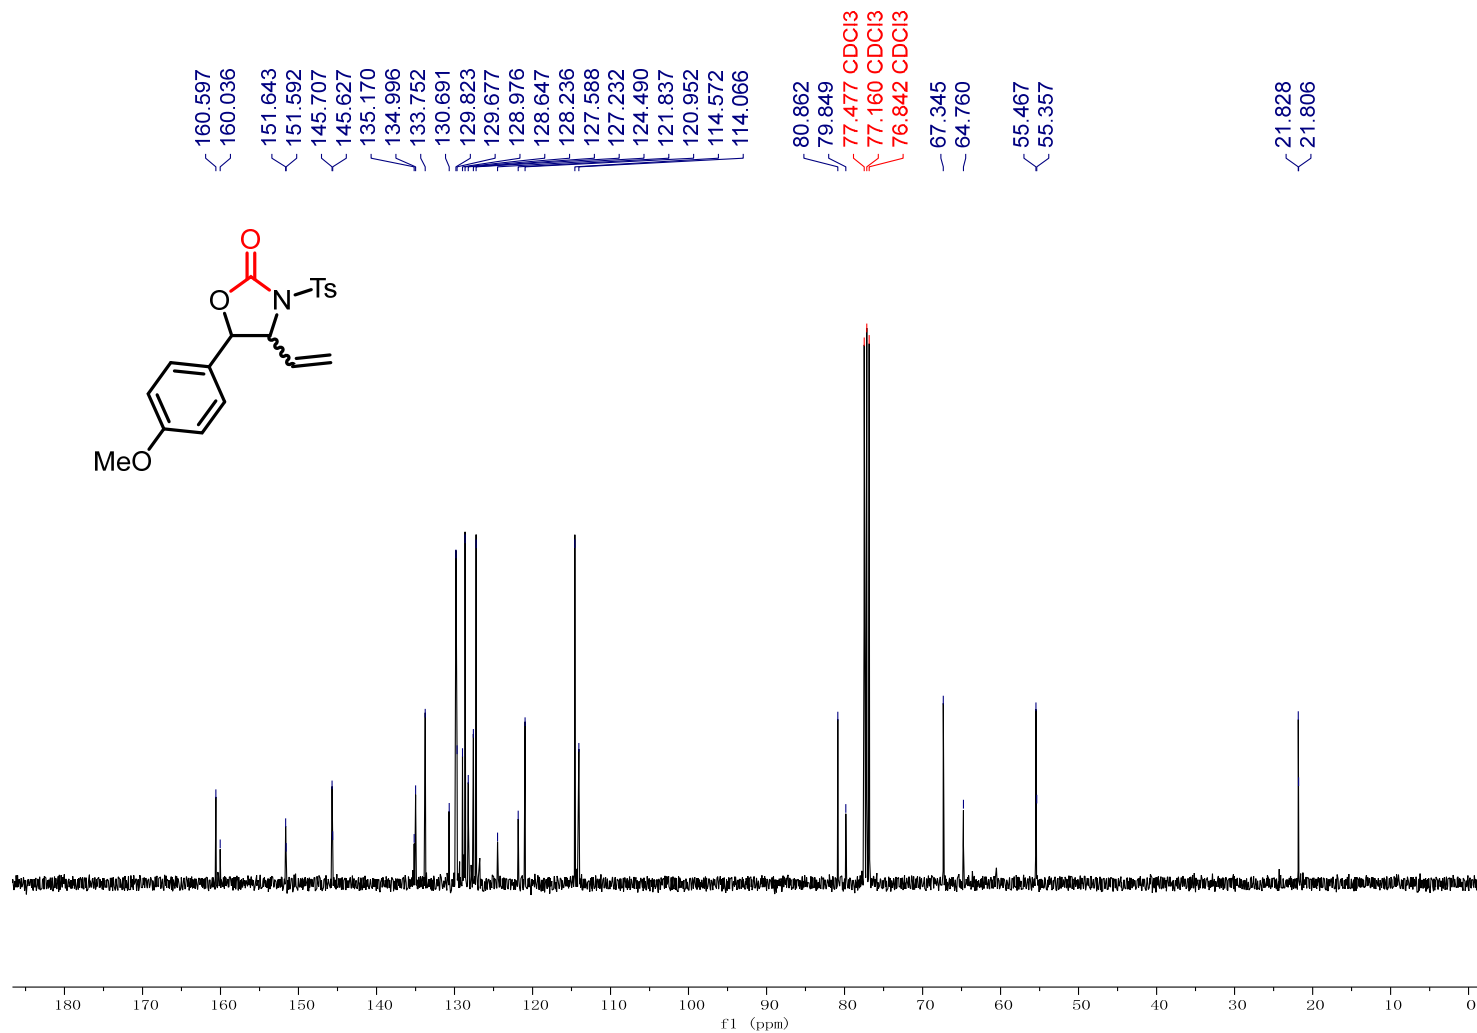

**<sup>1</sup>H NMR (400 MHz, CDCl<sub>3</sub>) Spectrum of 5-(naphthalen-2-yl)-3-tosyl-4-vinyloxazolidin-2-one 3x**

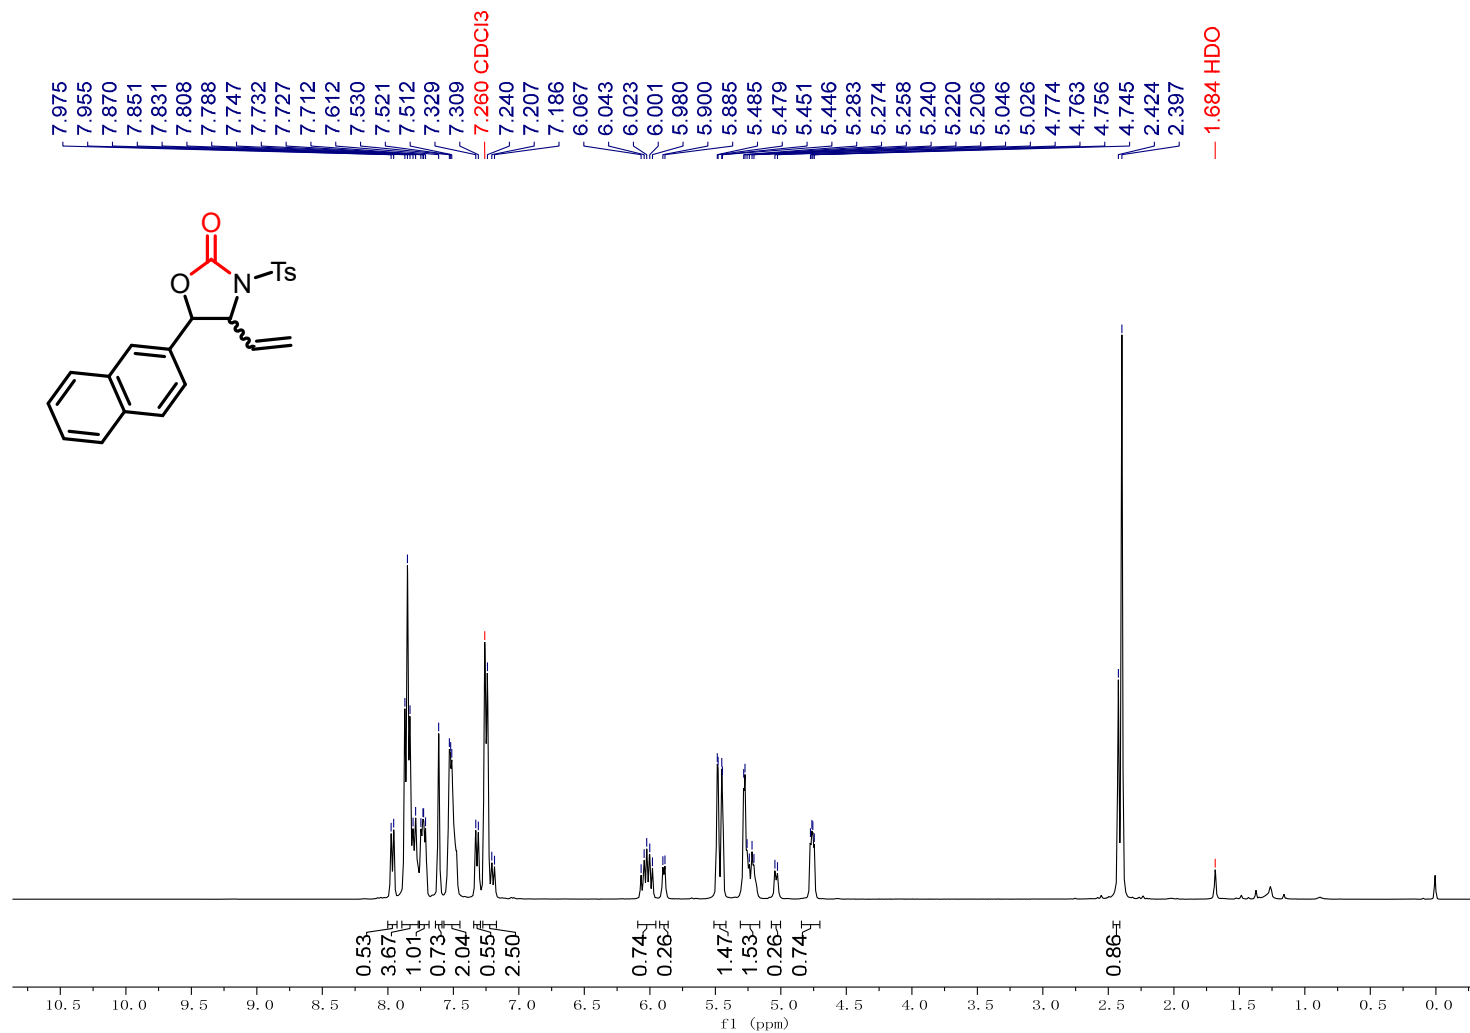

<sup>13</sup>C NMR (100 MHz, CDCl<sub>3</sub>) Spectrum of 5-(naphthalen-2-yl)-3-tosyl-4-vinylloxazolidin-2-one 3x

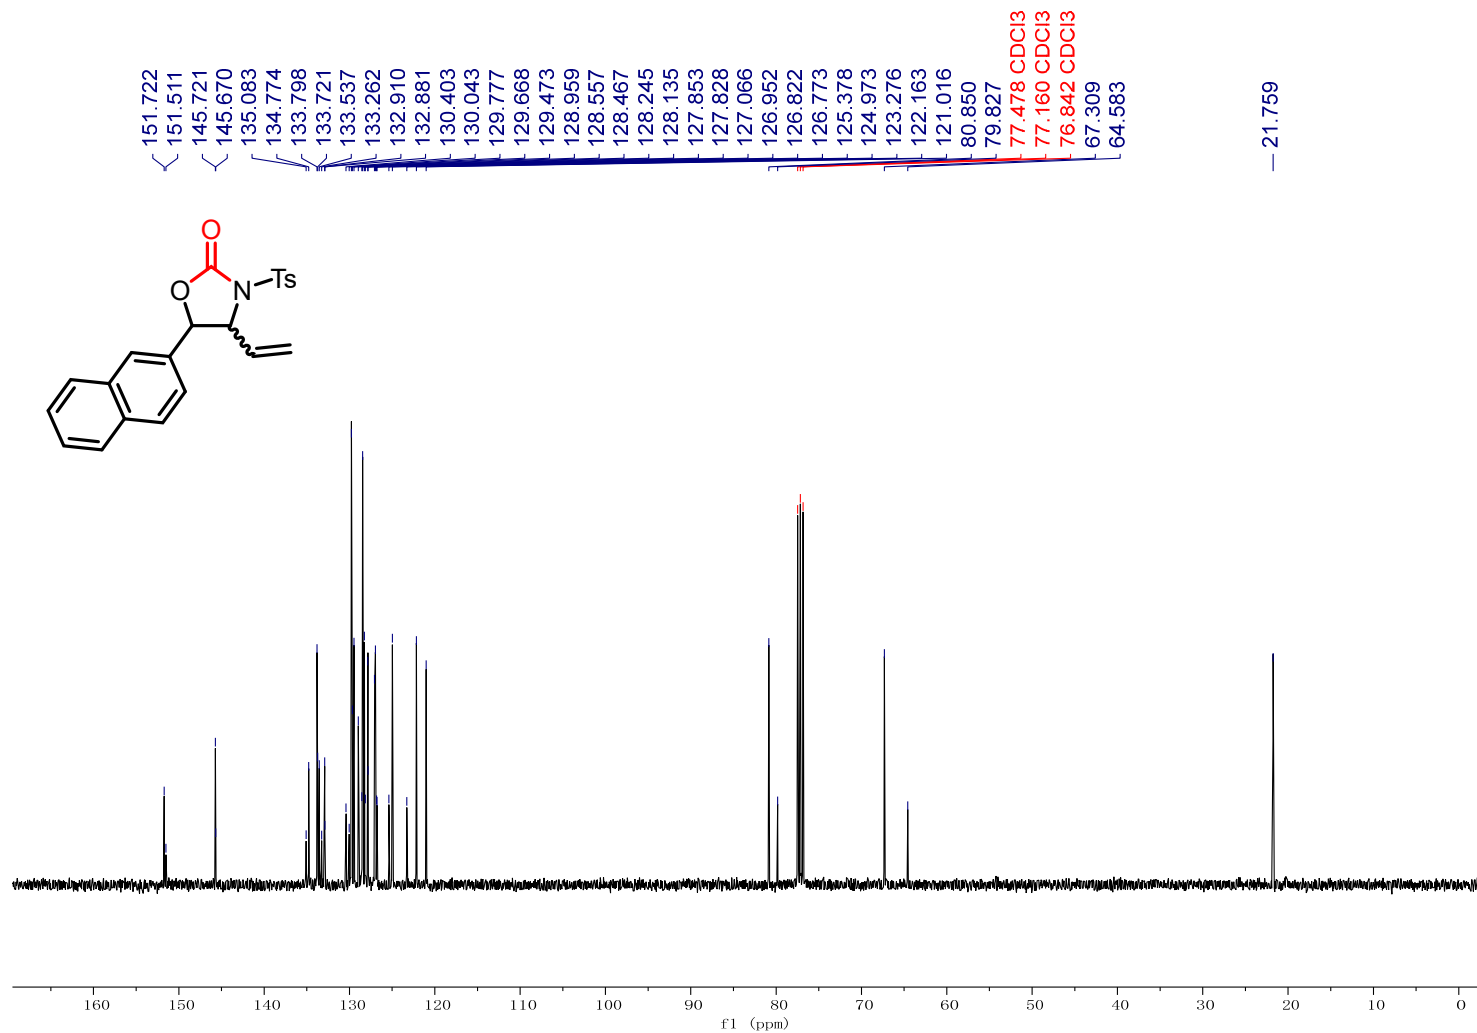

**<sup>1</sup>H NMR (400 MHz, CDCl<sub>3</sub>) Spectrum of 5-(thiophen-3-yl)-3-tosyl-4-vinylloxazolidin-2-one 3y**

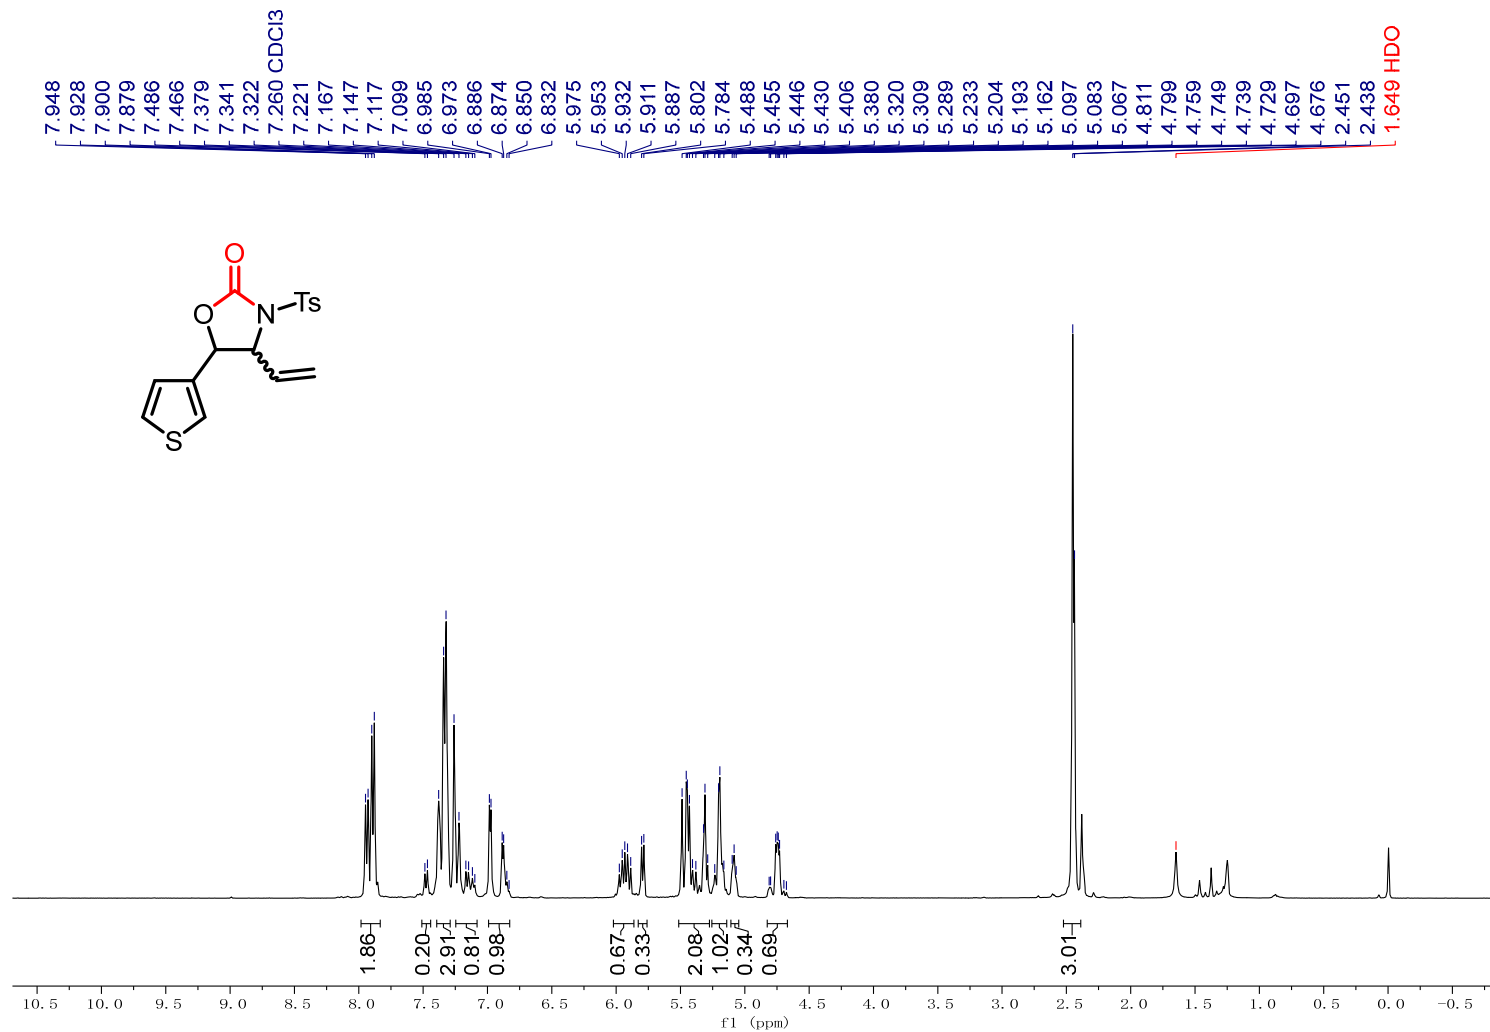



**<sup>13</sup>C NMR (100 MHz, CDCl<sub>3</sub>) Spectrum of 5-(thiophen-3-yl)-3-tosyl-4-vinyloxazolidin-2-one 3y**

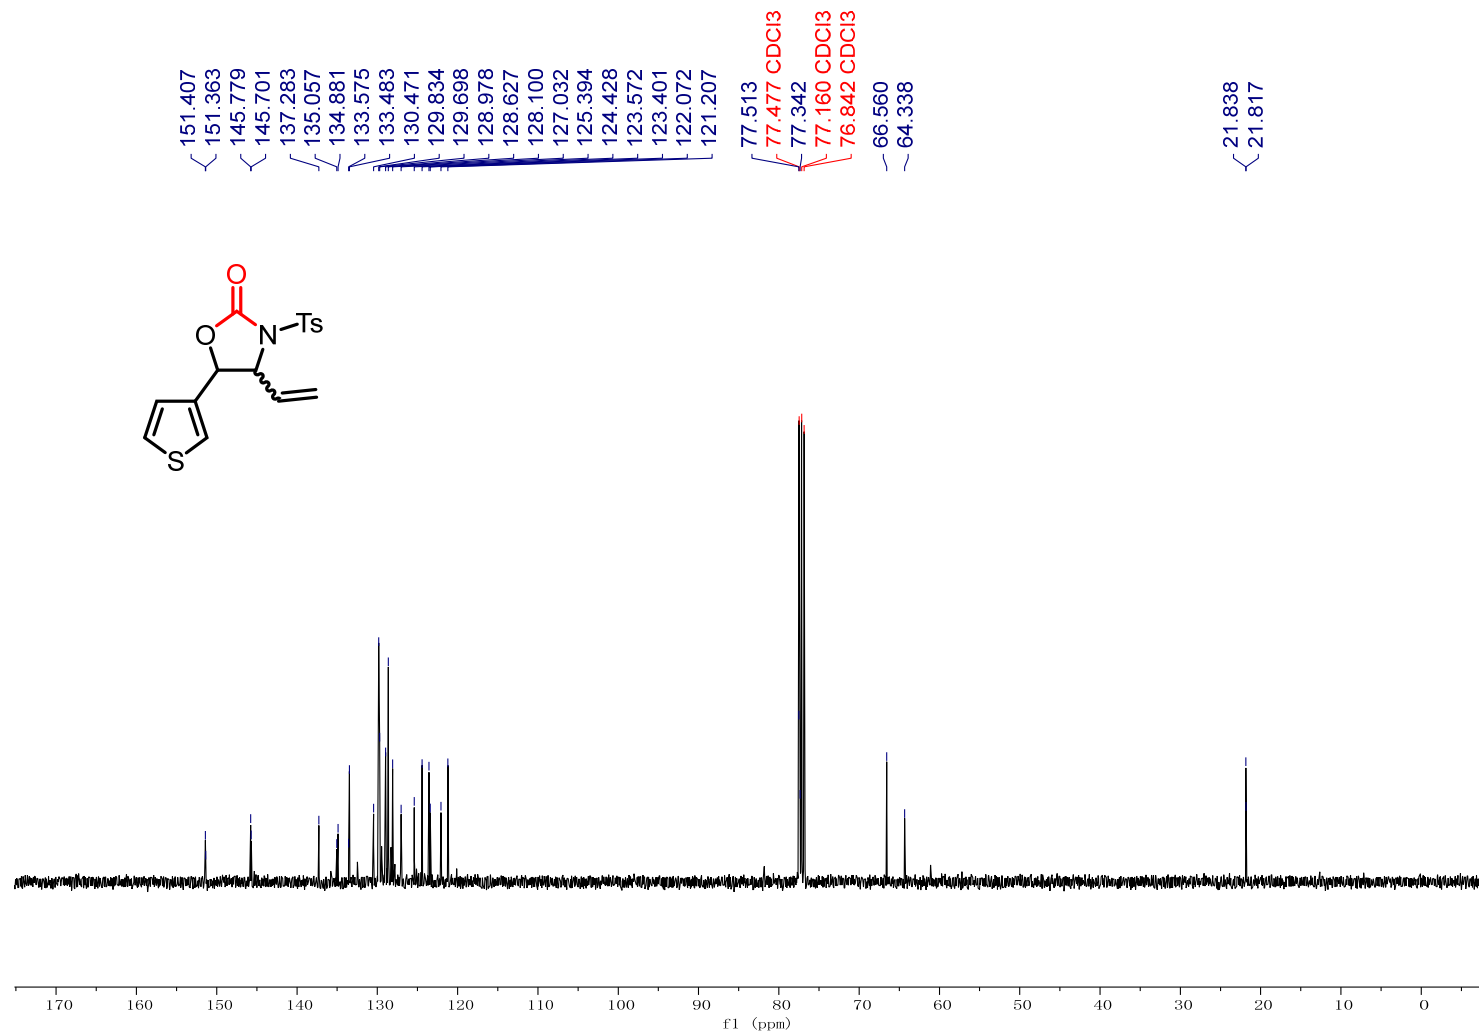

**<sup>1</sup>H NMR (400 MHz, CDCl<sub>3</sub>) Spectrum of *N*-(1-hydroxybut-3-en-2-yl)-4-methylbenzenesulfonamide 4**

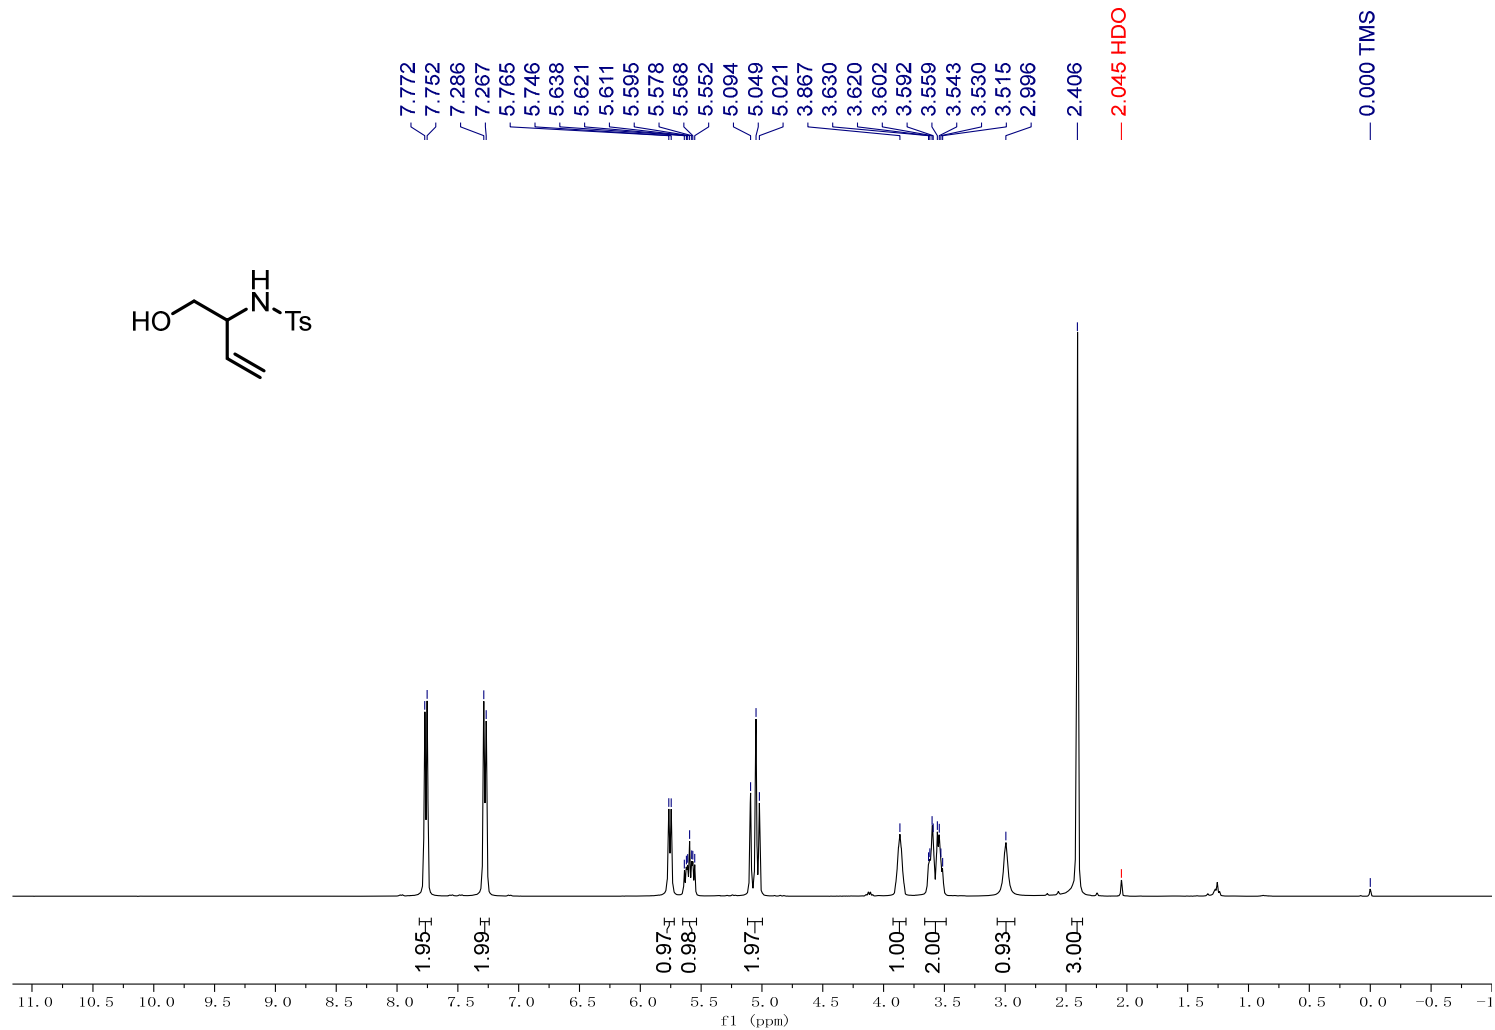

<sup>13</sup>C NMR (100 MHz, CDCl<sub>3</sub>) Spectrum of *N*-(1-hydroxybut-3-en-2-yl)-4-methylbenzenesulfonamide 4

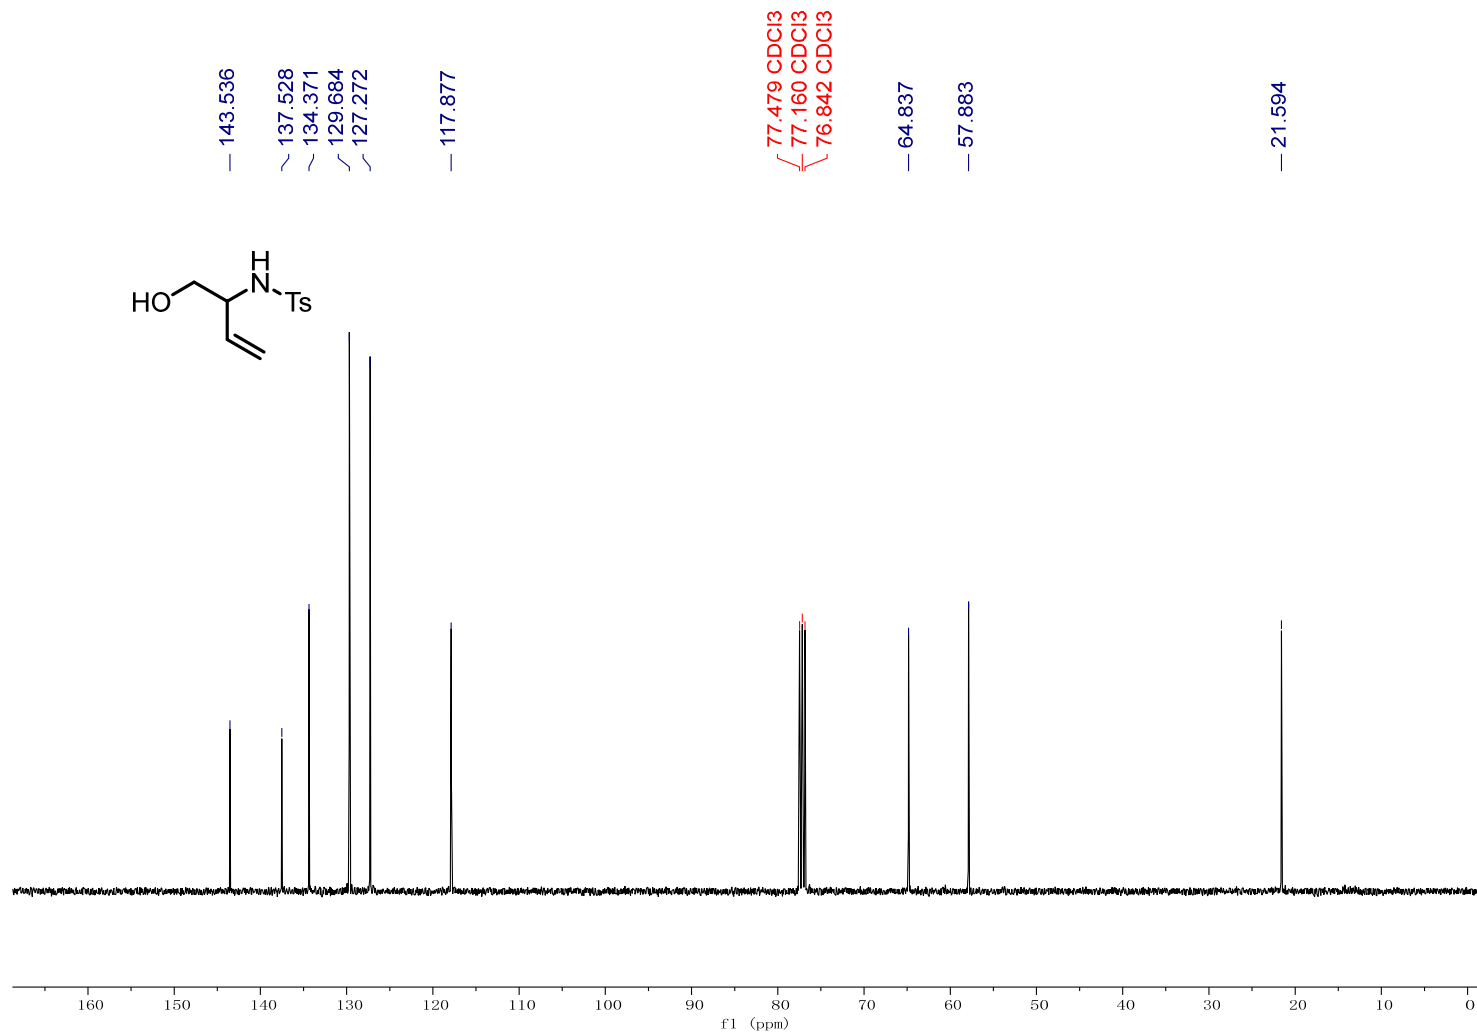

**<sup>1</sup>H NMR (400 MHz, CDCl<sub>3</sub>) Spectrum of 4-vinyloxazolidin-2-one 5**

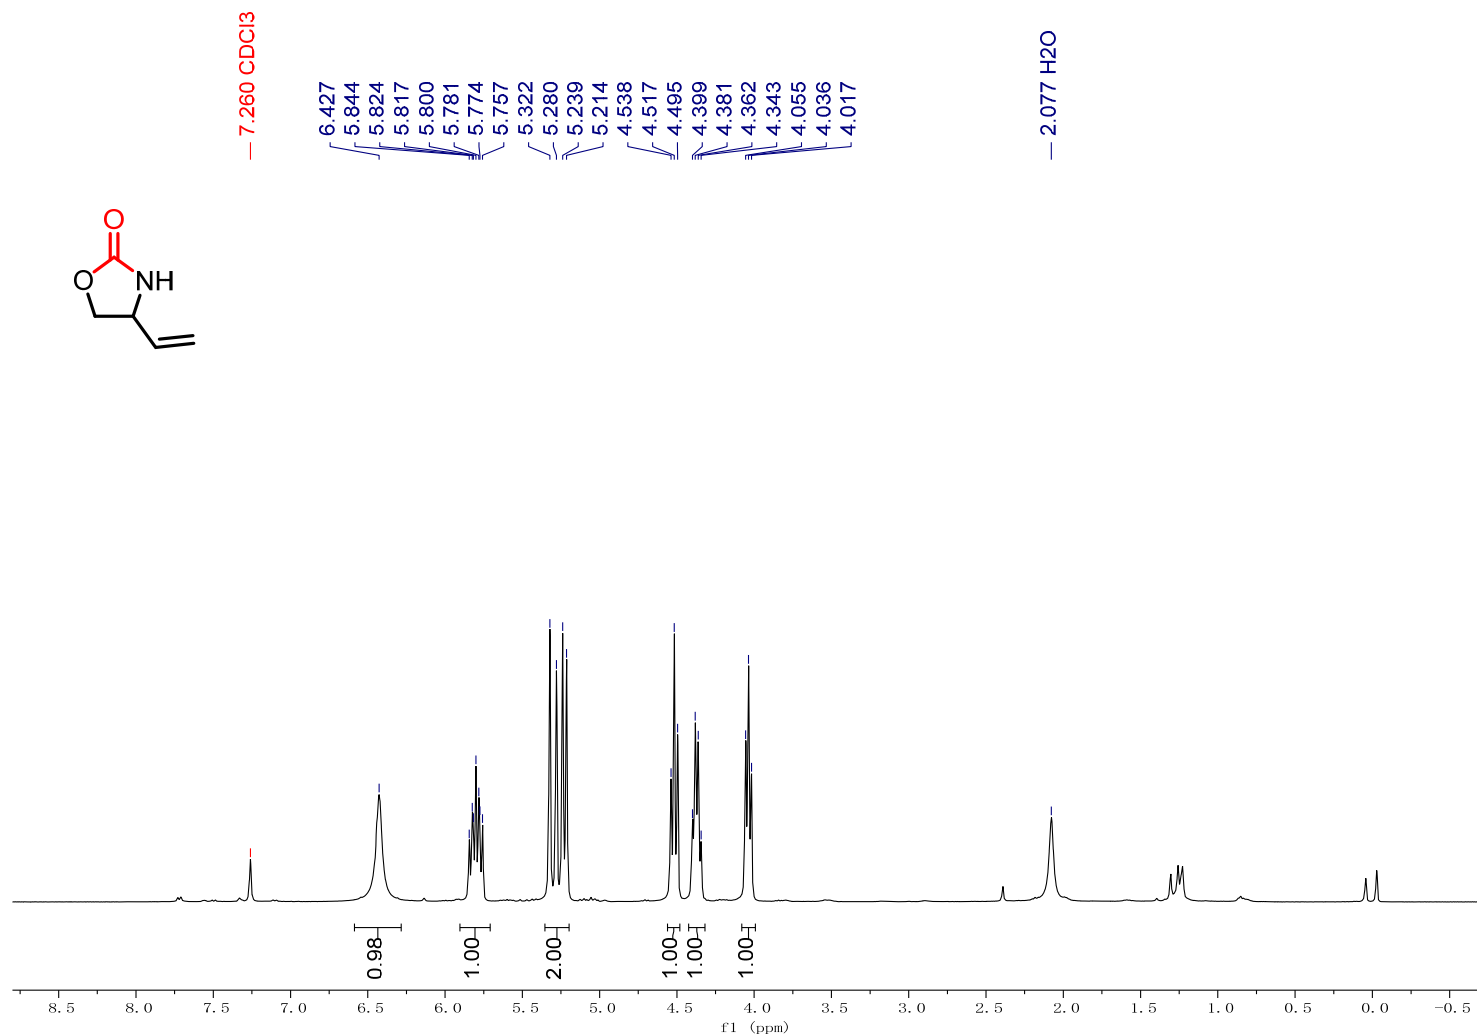

<sup>13</sup>C NMR (100 MHz, CDCl<sub>3</sub>) Spectrum of 4-vinyloxazolidin-2-one 5

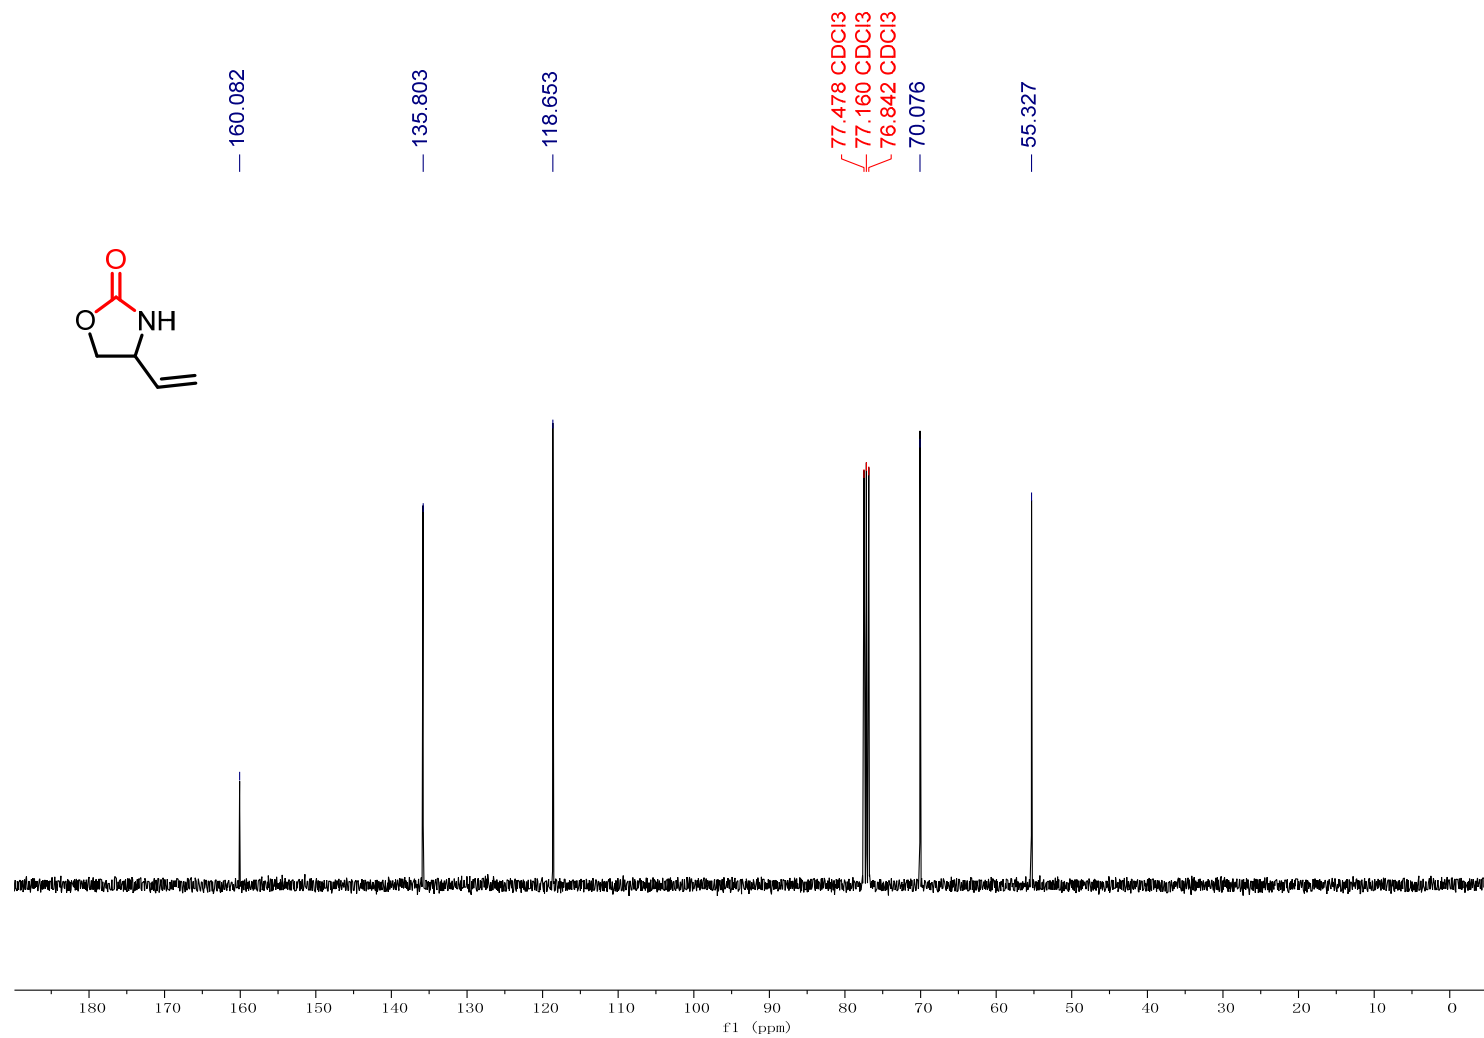

<sup>1</sup>H NMR (400 MHz, CDCl<sub>3</sub>) Spectrum of (*E*)-4-styryl-3-tosyloxazolidin-2-one 6

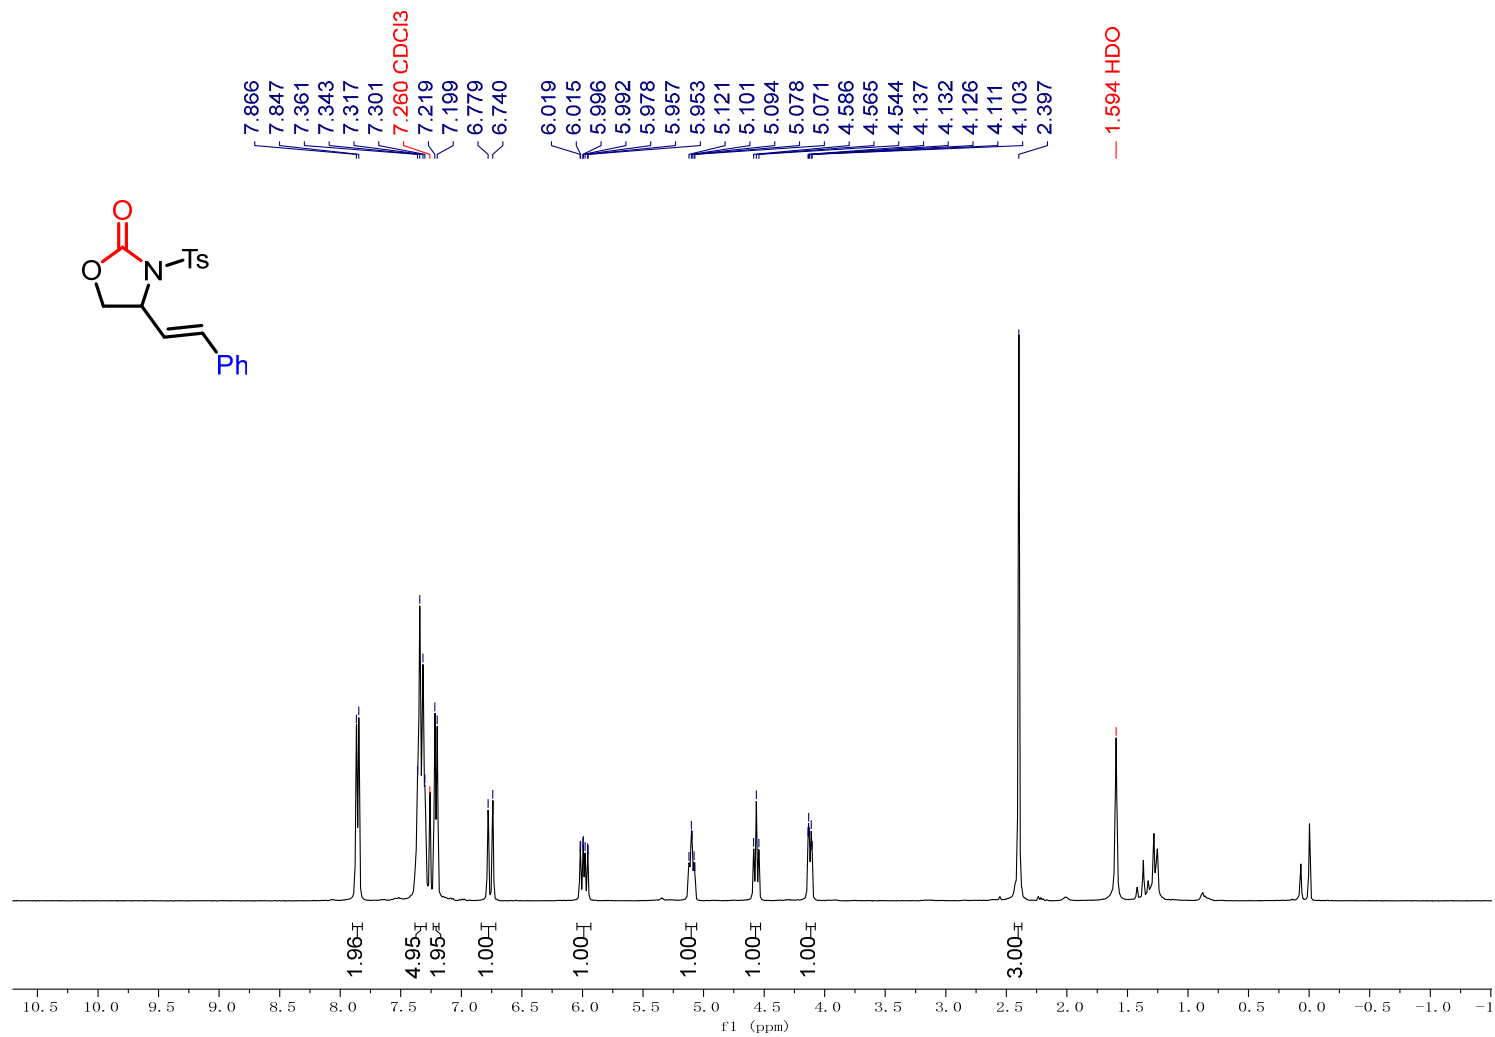

<sup>13</sup>C NMR (100 MHz, CDCl<sub>3</sub>) Spectrum of (*E*)-4-styryl-3-tosyloxazolidin-2-one **6**

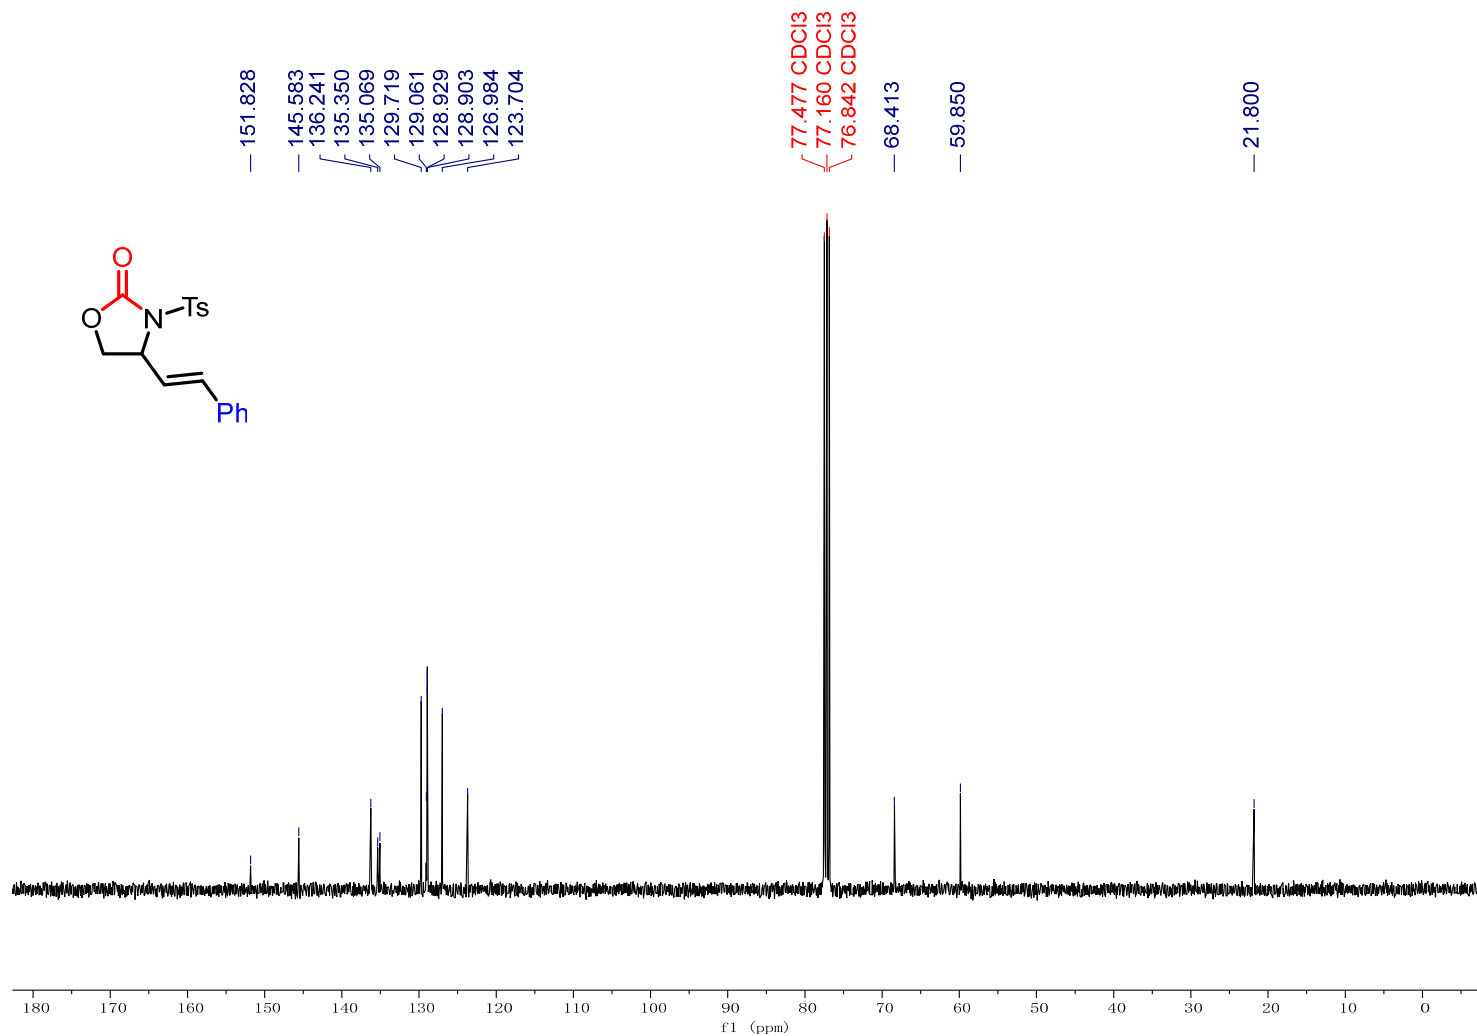

Supplement: d1qo00591j1.pdf [file d1qo00591j1.pdf]
